# Supplementary material for: Reactivity of Calcined Clays as SCM—A Review
Source: Materials (Basel). 2024 Jan 8;17(2):312. doi: 10.3390/ma17020312 (PMC10820630; doi:10.3390/ma17020312)
Supplement: Supplementary file 1 [file materials-17-00312-s001.zip › File S1.xlsx]

## Sheet: mortar tests
No.	reference	Calcined Clay								cement					CC/clinker	w/b	admixture		aggregate			samples	curing	storage	compressive strength of the reference mortar after					compressive strength of the mortar with CC after					relative compressive strength after
		raw material category	origin country	sample name	calcination furnace	max. grainsize before calcination	calcination temperature	calcination duration	content	type	strength class		clinker content	content			type	proportion	type	grading	content				2 d	7 d	28 d	56 d	90 d	2 d	7 d	28 d	56 d	90 d	2 d	7 d	28 d	56 d	90 d
-		-		-	-	mm	°C	h	wt. % of binder	-	-		-	wt. % of binder	-	-	-	wt.-% of binder	-	-	mass proportion normalized on binder	-	°C/ % r. h.	°C/ % r. h.	N/mm2					N/mm²					N/mm2
1	/Beu12/	illitic-kaolinitic clay	Germany	Lias Delta Clay	rotary kiln	< 100	< 950	00:35:00	20	CEM I	42.5	R	1	80	0.25	0.5	-	-	quartz sand	0/2 mm	3	40 × 40 × 160 mm³	20 / W	20 / W	29.4	51.2	66	80.1	-	24	43.3	63.7	78.6	-	0.816327	0.845703	0.965152	0.981273	-
2	/Beu12/	illitic-kaolinitic clay	Germany	Lias Delta Clay	rotary kiln	< 100	< 950	00:35:00	20	CEM II/A-LL	32.5	R	0.8-0.94	80	0.31-0.27	0.5	-	-	quartz sand	0/2 mm	3	40 × 40 × 160 mm³	20 / W	20 / W	23.2	37.1	47.5	59.9	-	19.4	33.7	54.3	67.2	-	0.836207	0.908356	1.14316	1.12187	-
3	/Beu12/	illitic-kaolinitic clay	Germany	Lias Delta Clay	rotary kiln	< 100	< 950	00:35:00	20	CEM II B-S	42.5	N	0.65-0.79	80	0.38-0.32	0.5	-	-	quartz sand	0/2 mm	3	40 × 40 × 160 mm³	20 / W	20 / W	26.7	36.3	60.8	76.2	-	18.8	32.6	48.5	63	-	0.70412	0.898072	0.797697	0.826772	-
4	/Dan13/	kaolinitic clay	Portugal	AB1080	muffle kiln	-	700	00:45:00	20	CEM I	-	-	1	80	0.25	0.5	-	-	quartz sand	0/2 mm	3	40 × 40 × 160 mm³	20 / W	20 / W	-	-	55.2	-	-	-	-	62.2	-	-	-	-	1.12681	-	-
5	/Dan13/	kaolinitic clay	Portugal	AB1080	muffle kiln	-	725	00:45:00	20	CEM I	-	-	1	80	0.25	0.5	-	-	quartz sand	0/2 mm	3	40 × 40 × 160 mm³	20 / W	20 / W	-	-	55.2	-	-	-	-	63.9	-	-	-	-	1.15761	-	-
6	/Dan13/	kaolinitic clay	Portugal	AB1080	muffle kiln	-	750	00:45:00	20	CEM I	-	-	1	80	0.25	0.5	-	-	quartz sand	0/2 mm	3	40 × 40 × 160 mm³	20 / W	20 / W	-	-	55.2	-	-	-	-	64.1	-	-	-	-	1.16123	-	-
7	/Dan13/	kaolinitic clay	Portugal	AB1080	muffle kiln	-	775	00:45:00	20	CEM I	-	-	1	80	0.25	0.5	-	-	quartz sand	0/2 mm	3	40 × 40 × 160 mm³	20 / W	20 / W	-	-	55.2	-	-	-	-	64.9	-	-	-	-	1.17572	-	-
8	/Dan13/	kaolinitic clay	Portugal	AB1080	muffle kiln	-	800	00:45:00	20	CEM I	-	-	1	80	0.25	0.5	-	-	quartz sand	0/2 mm	3	40 × 40 × 160 mm³	20 / W	20 / W	-	-	55.2	-	-	-	-	62.7	-	-	-	-	1.13587	-	-
9	/Dan13/	kaolinitic clay	Portugal	Aldeia e Irmao	muffle kiln	-	700	00:45:00	20	CEM I	-	-	1	80	0.25	0.5	-	-	quartz sand	0/2 mm	3	40 × 40 × 160 mm³	20 / W	20 / W	-	-	55.2	-	-	-	-	60.7	-	-	-	-	1.09964	-	-
10	/Dan13/	kaolinitic clay	Portugal	Aldeia e Irmao	muffle kiln	-	725	00:45:00	20	CEM I	-	-	1	80	0.25	0.5	-	-	quartz sand	0/2 mm	3	40 × 40 × 160 mm³	20 / W	20 / W	-	-	55.2	-	-	-	-	60.1	-	-	-	-	1.08877	-	-
11	/Dan13/	kaolinitic clay	Portugal	Aldeia e Irmao	muffle kiln	-	750	00:45:00	20	CEM I	-	-	1	80	0.25	0.5	-	-	quartz sand	0/2 mm	3	40 × 40 × 160 mm³	20 / W	20 / W	-	-	55.2	-	-	-	-	60.5	-	-	-	-	1.09601	-	-
12	/Dan13/	kaolinitic clay	Portugal	Aldeia e Irmao	muffle kiln	-	775	00:45:00	20	CEM I	-	-	1	80	0.25	0.5	-	-	quartz sand	0/2 mm	3	40 × 40 × 160 mm³	20 / W	20 / W	-	-	55.2	-	-	-	-	60.3	-	-	-	-	1.09239	-	-
13	/Dan13/	kaolinitic clay	Portugal	Aldeia e Irmao	muffle kiln	-	800	00:45:00	20	CEM I	-	-	1	80	0.25	0.5	-	-	quartz sand	0/2 mm	3	40 × 40 × 160 mm³	20 / W	20 / W	-	-	55.2	-	-	-	-	61	-	-	-	-	1.10507	-	-
14	/Dan13/	kaolinitic clay	Portugal	Kal-Sorgila	muffle kiln	-	700	00:45:00	20	CEM I	-	-	1	80	0.25	0.5	-	-	quartz sand	0/2 mm	3	40 × 40 × 160 mm³	20 / W	20 / W	-	-	55.2	-	-	-	-	60.3	-	-	-	-	1.09239	-	-
15	/Dan13/	kaolinitic clay	Portugal	Kal-Sorgila	muffle kiln	-	725	00:45:00	20	CEM I	-	-	1	80	0.25	0.5	-	-	quartz sand	0/2 mm	3	40 × 40 × 160 mm³	20 / W	20 / W	-	-	55.2	-	-	-	-	61	-	-	-	-	1.10507	-	-
16	/Dan13/	kaolinitic clay	Portugal	Kal-Sorgila	muffle kiln	-	750	00:45:00	20	CEM I	-	-	1	80	0.25	0.5	-	-	quartz sand	0/2 mm	3	40 × 40 × 160 mm³	20 / W	20 / W	-	-	55.2	-	-	-	-	60.4	-	-	-	-	1.0942	-	-
17	/Dan13/	kaolinitic clay	Portugal	Kal-Sorgila	muffle kiln	-	775	00:45:00	20	CEM I	-	-	1	80	0.25	0.5	-	-	quartz sand	0/2 mm	3	40 × 40 × 160 mm³	20 / W	20 / W	-	-	55.2	-	-	-	-	60	-	-	-	-	1.08696	-	-
18	/Dan13/	kaolinitic clay	Portugal	Kal-Sorgila	muffle kiln	-	800	00:45:00	20	CEM I	-	-	1	80	0.25	0.5	-	-	quartz sand	0/2 mm	3	40 × 40 × 160 mm³	20 / W	20 / W	-	-	55.2	-	-	-	-	62	-	-	-	-	1.12319	-	-
19	/Dan13/	kaolinitic clay	Portugal	Argila Sorgia	muffle kiln	-	700	00:45:00	20	CEM I	-	-	1	80	0.25	0.5	-	-	quartz sand	0/2 mm	3	40 × 40 × 160 mm³	20 / W	20 / W	-	-	50.9	-	-	-	-	45.9	-	-	-	-	0.901768	-	-
20	/Dan13/	kaolinitic clay	Portugal	Argila Sorgia	muffle kiln	-	750	00:45:00	20	CEM I	-	-	1	80	0.25	0.5	-	-	quartz sand	0/2 mm	3	40 × 40 × 160 mm³	20 / W	20 / W	-	-	50.9	-	-	-	-	46.2	-	-	-	-	0.907662	-	-
21	/Dan13/	kaolinitic clay	Portugal	Argila Sorgia	muffle kiln	-	800	00:45:00	20	CEM I	-	-	1	80	0.25	0.5	-	-	quartz sand	0/2 mm	3	40 × 40 × 160 mm³	20 / W	20 / W	-	-	50.9	-	-	-	-	49.2	-	-	-	-	0.966601	-	-
22	/Dan13/	illitic clay	Portugal	Argila Rascoia	muffle kiln	-	700	00:45:00	20	CEM I	-	-	1	80	0.25	0.5	-	-	quartz sand	0/2 mm	3	40 × 40 × 160 mm³	20 / W	20 / W	-	-	52.1	-	-	-	-	44.6	-	-	-	-	0.856046	-	-
23	/Dan13/	illitic clay	Portugal	Argila Rascoia	muffle kiln	-	750	00:45:00	20	CEM I	-	-	1	80	0.25	0.5	-	-	quartz sand	0/2 mm	3	40 × 40 × 160 mm³	20 / W	20 / W	-	-	52.1	-	-	-	-	41.4	-	-	-	-	0.794626	-	-
24	/Dan13/	illitic clay	Portugal	Argila Rascoia	muffle kiln	-	800	00:45:00	20	CEM I	-	-	1	80	0.25	0.5	-	-	quartz sand	0/2 mm	3	40 × 40 × 160 mm³	20 / W	20 / W	-	-	52.1	-	-	-	-	44.3	-	-	-	-	0.850288	-	-
25	/Dan13/	smectitic marl	Denmark	Sovind Marl	muffle kiln	-	700	00:45:00	20	CEM I	-	-	1	80	0.25	0.5	-	-	quartz sand	0/2 mm	3	40 × 40 × 160 mm³	20 / W	20 / W	-	-	55.2	-	-	-	-	53.2	-	-	-	-	0.963768	-	-
26	/Dan13/	smectitic marl	Denmark	Sovind Marl	muffle kiln	-	750	00:45:00	20	CEM I	-	-	1	80	0.25	0.5	-	-	quartz sand	0/2 mm	3	40 × 40 × 160 mm³	20 / W	20 / W	-	-	55.2	-	-	-	-	56.8	-	-	-	-	1.02899	-	-
27	/Dan13/	smectitic marl	Denmark	Sovind Marl	muffle kiln	-	800	00:45:00	20	CEM I	-	-	1	80	0.25	0.5	-	-	quartz sand	0/2 mm	3	40 × 40 × 160 mm³	20 / W	20 / W	-	-	55.2	-	-	-	-	61.6	-	-	-	-	1.11594	-	-
28	/Dan13/	smectitic marl	Denmark	Sovind Marl	muffle kiln	-	850	00:45:00	20	CEM I	-	-	1	80	0.25	0.5	-	-	quartz sand	0/2 mm	3	40 × 40 × 160 mm³	20 / W	20 / W	-	-	55.2	-	-	-	-	56	-	-	-	-	1.01449	-	-
29	/Dan13/	smectitic marl	Denmark	Sovind Marl	muffle kiln	-	900	00:45:00	20	CEM I	-	-	1	80	0.25	0.5	-	-	quartz sand	0/2 mm	3	40 × 40 × 160 mm³	20 / W	20 / W	-	-	55.2	-	-	-	-	52.1	-	-	-	-	0.943841	-	-
30	/Dan13/	smectitic marl	Denmark	Sovind Marl	muffle kiln	-	950	00:45:00	20	CEM I	-	-	1	80	0.25	0.5	-	-	quartz sand	0/2 mm	3	40 × 40 × 160 mm³	20 / W	20 / W	-	-	55.2	-	-	-	-	50.2	-	-	-	-	0.90942	-	-
31	/Dan13/	smectitic marl	Denmark	Sovind Marl	muffle kiln	-	1000	00:45:00	20	CEM I	-	-	1	80	0.25	0.5	-	-	quartz sand	0/2 mm	3	40 × 40 × 160 mm³	20 / W	20 / W	-	-	55.2	-	-	-	-	51.1	-	-	-	-	0.925725	-	-
32	/Dan13/	smectitic marl	Denmark	Sovind Marl	industrial rotary kiln	-	750	-	20	CEM I	-	-	1	80	0.25	0.5	-	-	quartz sand	0/2 mm	3	40 × 40 × 160 mm³	20 / W	20 / W	-	-	51.1	-	-	-	-	46.3	-	-	-	-	0.906067	-	-
33	/Dan13/	smectitic marl	Denmark	Sovind Marl	industrial rotary kiln	-	800	-	20	CEM I	-	-	1	80	0.25	0.5	-	-	quartz sand	0/2 mm	3	40 × 40 × 160 mm³	20 / W	20 / W	-	-	51.1	-	-	-	-	49.9	-	-	-	-	0.976517	-	-
34	/Dan13/	smectitic marl	Denmark	Sovind Marl	industrial rotary kiln	-	850	-	20	CEM I	-	-	1	80	0.25	0.5	-	-	quartz sand	0/2 mm	3	40 × 40 × 160 mm³	20 / W	20 / W	-	-	51.1	-	-	-	-	51.6	-	-	-	-	1.00978	-	-
35	/Dan13/	smectitic marl	Denmark	Sovind Marl	industrial rotary kiln	-	900	-	20	CEM I	-	-	1	80	0.25	0.5	-	-	quartz sand	0/2 mm	3	40 × 40 × 160 mm³	20 / W	20 / W	-	-	51.1	-	-	-	-	57.3	-	-	-	-	1.12133	-	-
36	/Dan13/	smectitic marl	Denmark	Sovind Marl	industrial rotary kiln	-	950	-	20	CEM I	-	-	1	80	0.25	0.5	-	-	quartz sand	0/2 mm	3	40 × 40 × 160 mm³	20 / W	20 / W	-	-	51.1	-	-	-	-	49.9	-	-	-	-	0.976517	-	-
37	/Dan13/	smectitic marl	Denmark	Sovind Marl H2	muffle kiln	-	600	00:45:00	20	CEM I	-	-	1	80	0.25	0.5	-	-	quartz sand	0/2 mm	3	40 × 40 × 160 mm³	20 / W	20 / W	-	-	55.2	-	-	-	-	48	-	-	-	-	0.869565	-	-
38	/Dan13/	smectitic marl	Denmark	Sovind Marl H2	muffle kiln	-	650	00:45:00	20	CEM I	-	-	1	80	0.25	0.5	-	-	quartz sand	0/2 mm	3	40 × 40 × 160 mm³	20 / W	20 / W	-	-	55.2	-	-	-	-	50.4	-	-	-	-	0.913043	-	-
39	/Dan13/	smectitic marl	Denmark	Sovind Marl H2	muffle kiln	-	700	00:45:00	20	CEM I	-	-	1	80	0.25	0.5	-	-	quartz sand	0/2 mm	3	40 × 40 × 160 mm³	20 / W	20 / W	-	-	55.2	-	-	-	-	51.2	-	-	-	-	0.927536	-	-
40	/Dan13/	smectitic marl	Denmark	Sovind Marl H2	muffle kiln	-	750	00:45:00	20	CEM I	-	-	1	80	0.25	0.5	-	-	quartz sand	0/2 mm	3	40 × 40 × 160 mm³	20 / W	20 / W	-	-	55.2	-	-	-	-	53.3	-	-	-	-	0.96558	-	-
41	/Dan13/	smectitic marl	Denmark	Sovind Marl H2	muffle kiln	-	800	00:45:00	20	CEM I	-	-	1	80	0.25	0.5	-	-	quartz sand	0/2 mm	3	40 × 40 × 160 mm³	20 / W	20 / W	-	-	55.2	-	-	-	-	52.8	-	-	-	-	0.956522	-	-
42	/Dan13/	smectitic marl	Denmark	Sovind Marl H2	muffle kiln	-	850	00:45:00	20	CEM I	-	-	1	80	0.25	0.5	-	-	quartz sand	0/2 mm	3	40 × 40 × 160 mm³	20 / W	20 / W	-	-	55.2	-	-	-	-	57.4	-	-	-	-	1.03986	-	-
43	/Dan13/	smectitic marl	Denmark	Sovind Marl H3	muffle kiln	-	600	00:45:00	20	CEM I	-	-	1	80	0.25	0.5	-	-	quartz sand	0/2 mm	3	40 × 40 × 160 mm³	20 / W	20 / W	-	-	55.2	-	-	-	-	50.6	-	-	-	-	0.916667	-	-
44	/Dan13/	smectitic marl	Denmark	Sovind Marl H3	muffle kiln	-	650	00:45:00	20	CEM I	-	-	1	80	0.25	0.5	-	-	quartz sand	0/2 mm	3	40 × 40 × 160 mm³	20 / W	20 / W	-	-	55.2	-	-	-	-	51.1	-	-	-	-	0.925725	-	-
45	/Dan13/	smectitic marl	Denmark	Sovind Marl H3	muffle kiln	-	700	00:45:00	20	CEM I	-	-	1	80	0.25	0.5	-	-	quartz sand	0/2 mm	3	40 × 40 × 160 mm³	20 / W	20 / W	-	-	55.2	-	-	-	-	53.1	-	-	-	-	0.961957	-	-
46	/Dan13/	smectitic marl	Denmark	Sovind Marl H3	muffle kiln	-	750	00:45:00	20	CEM I	-	-	1	80	0.25	0.5	-	-	quartz sand	0/2 mm	3	40 × 40 × 160 mm³	20 / W	20 / W	-	-	55.2	-	-	-	-	54.8	-	-	-	-	0.992754	-	-
47	/Dan13/	smectitic marl	Denmark	Sovind Marl H3	muffle kiln	-	800	00:45:00	20	CEM I	-	-	1	80	0.25	0.5	-	-	quartz sand	0/2 mm	3	40 × 40 × 160 mm³	20 / W	20 / W	-	-	55.2	-	-	-	-	55.5	-	-	-	-	1.00543	-	-
48	/Dan13/	smectitic marl	Denmark	Sovind Marl H3	muffle kiln	-	850	00:45:00	20	CEM I	-	-	1	80	0.25	0.5	-	-	quartz sand	0/2 mm	3	40 × 40 × 160 mm³	20 / W	20 / W	-	-	55.2	-	-	-	-	57.4	-	-	-	-	1.03986	-	-
49	/Dan13/	smectitic marl	Denmark	Sovind Marl H4	muffle kiln	-	600	00:45:00	20	CEM I	-	-	1	80	0.25	0.5	-	-	quartz sand	0/2 mm	3	40 × 40 × 160 mm³	20 / W	20 / W	-	-	55.2	-	-	-	-	47.2	-	-	-	-	0.855072	-	-
50	/Dan13/	smectitic marl	Denmark	Sovind Marl H4	muffle kiln	-	650	00:45:00	20	CEM I	-	-	1	80	0.25	0.5	-	-	quartz sand	0/2 mm	3	40 × 40 × 160 mm³	20 / W	20 / W	-	-	55.2	-	-	-	-	50.6	-	-	-	-	0.916667	-	-
51	/Dan13/	smectitic marl	Denmark	Sovind Marl H4	muffle kiln	-	700	00:45:00	20	CEM I	-	-	1	80	0.25	0.5	-	-	quartz sand	0/2 mm	3	40 × 40 × 160 mm³	20 / W	20 / W	-	-	55.2	-	-	-	-	50.9	-	-	-	-	0.922101	-	-
52	/Dan13/	smectitic marl	Denmark	Sovind Marl H4	muffle kiln	-	750	00:45:00	20	CEM I	-	-	1	80	0.25	0.5	-	-	quartz sand	0/2 mm	3	40 × 40 × 160 mm³	20 / W	20 / W	-	-	55.2	-	-	-	-	53.9	-	-	-	-	0.976449	-	-
53	/Dan13/	smectitic marl	Denmark	Sovind Marl H4	muffle kiln	-	800	00:45:00	20	CEM I	-	-	1	80	0.25	0.5	-	-	quartz sand	0/2 mm	3	40 × 40 × 160 mm³	20 / W	20 / W	-	-	55.2	-	-	-	-	54.4	-	-	-	-	0.985507	-	-
54	/Dan13/	smectitic marl	Denmark	Sovind Marl H4	muffle kiln	-	850	00:45:00	20	CEM I	-	-	1	80	0.25	0.5	-	-	quartz sand	0/2 mm	3	40 × 40 × 160 mm³	20 / W	20 / W	-	-	55.2	-	-	-	-	56.5	-	-	-	-	1.02355	-	-
55	/Dan13/	illitic clay	Poland	Gniew	muffle kiln	-	700	00:45:00	20	CEM I	-	-	1	80	0.25	0.5	-	-	quartz sand	0/2 mm	3	40 × 40 × 160 mm³	20 / W	20 / W	-	-	55.2	-	-	-	-	52.3	-	-	-	-	0.947464	-	-
56	/Dan13/	illitic clay	Poland	Gniew	muffle kiln	-	725	00:45:00	20	CEM I	-	-	1	80	0.25	0.5	-	-	quartz sand	0/2 mm	3	40 × 40 × 160 mm³	20 / W	20 / W	-	-	55.2	-	-	-	-	52.7	-	-	-	-	0.95471	-	-
57	/Dan13/	illitic clay	Poland	Gniew	muffle kiln	-	750	00:45:00	20	CEM I	-	-	1	80	0.25	0.5	-	-	quartz sand	0/2 mm	3	40 × 40 × 160 mm³	20 / W	20 / W	-	-	55.2	-	-	-	-	54.7	-	-	-	-	0.990942	-	-
58	/Dan13/	illitic clay	Poland	Gniew	muffle kiln	-	775	00:45:00	20	CEM I	-	-	1	80	0.25	0.5	-	-	quartz sand	0/2 mm	3	40 × 40 × 160 mm³	20 / W	20 / W	-	-	55.2	-	-	-	-	55.6	-	-	-	-	1.00725	-	-
59	/Dan13/	illitic clay	Poland	Gniew	muffle kiln	-	800	00:45:00	20	CEM I	-	-	1	80	0.25	0.5	-	-	quartz sand	0/2 mm	3	40 × 40 × 160 mm³	20 / W	20 / W	-	-	55.2	-	-	-	-	55.4	-	-	-	-	1.00362	-	-
60	/Tol07/	calcined-clay brick	Brazil	GCWCCB	-	-	850	-	10	CEM II/A	32	-	0.85-0.91	90	0.12-0.11	0.4	SP	-	natural sand	fineness modulus: 2.37	1.5	cyl. Ø: 50 mm, h: 100 mm	24 / W	24 / W	-	-	55.09	-	-	-	-	55.19	-	-	-	-	1.00182	-	-
61	/Tol07/	calcined-clay brick	Brazil	GCWCCB	-	-	850	-	20	CEM II/A	32	-	0.85-0.91	80	0.24-0.22	0.4	SP	-	natural sand	fineness modulus: 2.37	1.5	cyl. Ø: 50 mm, h: 100 mm	24 / W	24 / W	-	-	55.09	-	-	-	-	56.76	-	-	-	-	1.03031	-	-
62	/Tol07/	calcined-clay brick	Brazil	GCWCCB	-	-	850	-	30	CEM II/A	32	-	0.85-0.91	70	0.35-0.33	0.4	SP	-	natural sand	fineness modulus: 2.37	1.5	cyl. Ø: 50 mm, h: 100 mm	24 / W	24 / W	-	-	55.09	-	-	-	-	49.41	-	-	-	-	0.896896	-	-
63	/Tol07/	calcined-clay brick	Brazil	GCWCCB	-	-	850	-	40	CEM II/A	32	-	0.85-0.91	60	0.47-0.44	0.4	SP	-	natural sand	fineness modulus: 2.37	1.5	cyl. Ø: 50 mm, h: 100 mm	24 / W	24 / W	-	-	55.09	-	-	-	-	47.7	-	-	-	-	0.865856	-	-
64	/Tol07/	calcined-clay brick	Brazil	GCWCCB	-	-	850	-	10	CEM II/A	32	-	0.85-0.91	90	0.12-0.11	0.5	SP	-	natural sand	fineness modulus: 2.37	1.5	cyl. Ø: 50 mm, h: 100 mm	24 / W	24 / W	-	-	40.92	-	-	-	-	39.77	-	-	-	-	0.971896	-	-
65	/Tol07/	calcined-clay brick	Brazil	GCWCCB	-	-	850	-	20	CEM II/A	32	-	0.85-0.91	80	0.24-0.22	0.5	SP	-	natural sand	fineness modulus: 2.37	1.5	cyl. Ø: 50 mm, h: 100 mm	24 / W	24 / W	-	-	40.92	-	-	-	-	38.09	-	-	-	-	0.930841	-	-
66	/Tol07/	calcined-clay brick	Brazil	GCWCCB	-	-	850	-	30	CEM II/A	32	-	0.85-0.91	70	0.35-0.33	0.5	SP	-	natural sand	fineness modulus: 2.37	1.5	cyl. Ø: 50 mm, h: 100 mm	24 / W	24 / W	-	-	40.92	-	-	-	-	32.97	-	-	-	-	0.805718	-	-
67	/Tol07/	calcined-clay brick	Brazil	GCWCCB	-	-	850	-	40	CEM II/A	32	-	0.85-0.91	60	0.47-0.44	0.5	SP	-	natural sand	fineness modulus: 2.37	1.5	cyl. Ø: 50 mm, h: 100 mm	24 / W	24 / W	-	-	40.92	-	-	-	-	26.5	-	-	-	-	0.647605	-	-
68	/Beu15/	kaolinitc clay	Germany	LCT	muffle furnace	-	720	00:60	20	CEM I	-	-	1	80	0.25	0.5	-	-	quartz sand	0/2 mm	3	40 × 40 × 160 mm³	20 / W	20 / W	-	-	-	-	-	-	-	-	-	-	-	-	1.19	-	-
69	/Beu15/	kaolinitc clay	Germany	GCT	rotary kiln	-	750	-	20	CEM I	-	-	1	80	0.25	0.5	-	-	quartz sand	0/2 mm	3	40 × 40 × 160 mm³	20 / W	20 / W	-	-	-	-	-	-	-	-	-	-	-	-	1.12	-	-
70	/Beu15/	kaolinitc clay	Germany	LCT	muffle furnace	-	600	00:60	20	CEM I	-	-	1	80	0.25	0.5	-	-	quartz sand	0/2 mm	3	40 × 40 × 160 mm³	20 / W	20 / W	-	-	-	-	-	-	-	-	-	-	-	-	1	-	-
71	/Beu15/	kaolinitc clay	Germany	GCT	rotary kiln	-	600	-	20	CEM I	-	-	1	80	0.25	0.5	-	-	quartz sand	0/2 mm	3	40 × 40 × 160 mm³	20 / W	20 / W	-	-	-	-	-	-	-	-	-	-	-	-	1.02	-	-
72	/Beu15/	kaolinitc clay	Germany	LCT	muffle furnace	-	770	00:60	20	CEM I	-	-	1	80	0.25	0.5	-	-	quartz sand	0/2 mm	3	40 × 40 × 160 mm³	20 / W	20 / W	-	-	-	-	-	-	-	-	-	-	-	-	1.14	-	-
73	/Beu15/	kaolinitc clay	Germany	GCT	rotary kiln	-	800	-	20	CEM I	-	-	1	80	0.25	0.5	-	-	quartz sand	0/2 mm	3	40 × 40 × 160 mm³	20 / W	20 / W	-	-	-	-	-	-	-	-	-	-	-	-	1.08	-	-
74	/Beu15/	kaolinitc clay	Germany	LCT	muffle furnace	-	820	00:60	20	CEM I	-	-	1	80	0.25	0.5	-	-	quartz sand	0/2 mm	3	40 × 40 × 160 mm³	20 / W	20 / W	-	-	-	-	-	-	-	-	-	-	-	-	1.08	-	-
75	/Beu15/	kaolinitc clay	Germany	GCT	rotary kiln	-	850	-	20	CEM I	-	-	1	80	0.25	0.5	-	-	quartz sand	0/2 mm	3	40 × 40 × 160 mm³	20 / W	20 / W	-	-	-	-	-	-	-	-	-	-	-	-	1.19	-	-
76	/Beu15/	kaolinitc clay	Germany	LCT	muffle furnace	-	1000	00:60	20	CEM I	-	-	1	80	0.25	0.5	-	-	quartz sand	0/2 mm	3	40 × 40 × 160 mm³	20 / W	20 / W	-	-	-	-	-	-	-	-	-	-	-	-	0.82	-	-
77	/Beu15/	kaolinitc clay	Germany	GCT	rotary kiln	-	1000	-	20	CEM I	-	-	1	80	0.25	0.5	-	-	quartz sand	0/2 mm	3	40 × 40 × 160 mm³	20 / W	20 / W	-	-	-	-	-	-	-	-	-	-	-	-	0.93	-	-
78	/Trü19/	kaolinitc clay	-	K_700_D	pilot rotary kiln	-	700	00:10:00	30	CEM I	42.5	R	1	70	0.428571	0.5	-	-	quartz sand	0/2 mm	3	40 × 40 × 160 mm³	20 / W	20 / W	28.1	53.2	67.3	-	71.2	14.3	32.3	57.2	-	60.5	0.508897	0.607143	0.849926	-	0.849719
79	/Trü19/	kaolinitc clay	-	K_700_D	pilot rotary kiln	-	700	00:10:00	30	CEM I	42.5	R	1	70	0.428571	0.5	-	-	quartz sand	0/2 mm	3	40 × 40 × 160 mm³	20 / W	20 / W	37.5	47.9	53.5	-	64.1	24.8	48.6	56.4	-	61.7	0.661333	1.01461	1.05421	-	0.962559
80	/Trü19/	Illitic clay	-	I_900_D	pilot rotary kiln	-	900	00:10:00	30	CEM I	42.5	R	1	70	0.428571	0.5	-	-	quartz sand	0/2 mm	3	40 × 40 × 160 mm³	20 / W	20 / W	28.1	53.2	67.3	-	71.2	15.8	35.9	55.9	-	61.4	0.562278	0.674812	0.830609	-	0.86236
81	/Trü19/	Illitic clay	-	I_900_D	pilot rotary kiln	-	900	00:10:00	30	CEM I	42.5	R	1	70	0.428571	0.5	-	-	quartz sand	0/2 mm	3	40 × 40 × 160 mm³	20 / W	20 / W	37.5	47.9	53.5	-	64.1	26.1	40	48.6	-	52.8	0.696	0.835073	0.908411	-	0.823713
82	/Trü19/	smectitic clay	-	M_900_D	pilot rotary kiln	-	900	00:10:00	30	CEM I	42.5	R	1	70	0.428571	0.5	-	-	quartz sand	0/2 mm	3	40 × 40 × 160 mm³	20 / W	20 / W	28.1	53.2	67.3	-	71.2	14.2	33.9	54.5	-	66	0.505338	0.637218	0.809807	-	0.926966
83	/Trü19/	smectitic clay	-	M_900_D	pilot rotary kiln	-	900	00:10:00	30	CEM I	42.5	R	1	70	0.428571	0.5	-	-	quartz sand	0/2 mm	3	40 × 40 × 160 mm³	20 / W	20 / W	37.5	47.9	53.5	-	64.1	25	38.7	56.6	-	63.4	0.666667	0.807933	1.05794	-	0.98908
84	/He95/	Illitic clay	USA	Illite	muffle furnace	-	650	01:40:00	30	CEM I		-	1	70	0.428571	0.6	-	-	quartz sand	0/2 mm	3	20 × 20 × 150 mm³	40 / W	40 / W	33.7	53.7	69.2	-	65.6	18.9	32.8	39.2	-	40.3	0.560831	0.610801	0.566474	-	0.614329
85	/He95/	Illitic clay	USA	Illite	muffle furnace	-	790	01:40:00	30	CEM I		-	1	70	0.428571	0.6	-	-	quartz sand	0/2 mm	3	20 × 20 × 150 mm³	40 / W	40 / W	33.7	53.7	69.2	-	65.6	20	33.4	44.4	-	46.6	0.593472	0.621974	0.641618	-	0.710366
86	/He95/	Illitic clay	USA	Illite	muffle furnace	-	930	01:40:00	30	CEM I		-	1	70	0.428571	0.6	-	-	quartz sand	0/2 mm	3	20 × 20 × 150 mm³	40 / W	40 / W	33.7	53.7	69.2	-	65.6	19.1	35.6	54.6	-	59.8	0.566766	0.662942	0.789017	-	0.911585
87	/He94/	kaolin	Denmark?	kaolin	muffle furnace	-	550	01:40:00	30	CEM I		-	1	70	0.428571	0.6	-	-	quartz sand	0/2 mm	3	20 × 20 × 150 mm³	40 / W	40 / W	33.73	53.74	69.24	-	65.56	30.74	54.66	78.3	-	80.51	0.911355	1.01712	1.13085	-	1.22804
88	/He94/	kaolin	Denmark?	kaolin	muffle furnace	-	650	01:40:00	30	CEM I		-	1	70	0.428571	0.6	-	-	quartz sand	0/2 mm	3	20 × 20 × 150 mm³	40 / W	40 / W	33.73	53.74	69.24	-	65.56	32.53	62.1	84.58	-	83.27	0.964423	1.15556	1.22155	-	1.27013
89	/He94/	kaolin	Denmark?	kaolin	muffle furnace	-	800	01:40:00	30	CEM I		-	1	70	0.428571	0.6	-	-	quartz sand	0/2 mm	3	20 × 20 × 150 mm³	40 / W	40 / W	33.73	53.74	69.24	-	65.56	32.48	61.92	81.45	-	80.51	0.962941	1.15221	1.17634	-	1.22804
90	/He94/	kaolin	Denmark?	kaolin	muffle furnace	-	950	01:40:00	30	CEM I		-	1	70	0.428571	0.6	-	-	quartz sand	0/2 mm	3	20 × 20 × 150 mm³	40 / W	40 / W	33.73	53.74	69.24	-	65.56	23.88	57.31	84.3	-	87.24	0.707975	1.06643	1.2175	-	1.33069
91	/Bal21/	kaolinitic-illitic clay	Russian Federation	Nikitsky	-	-	200	1900-01-08	10	CEM I	-		1	90	0.111111	0.42	-	-			3	40 × 40 × 160 mm³	80		-	-	34.5	-	-	-	-	33.5	-	-	-	-	0.971014	-	-
92	/Bal21/	kaolinitic-illitic clay	Russian Federation	Nikitsky	-	-	400	02:00:00	10	CEM I	-		1	90	0.111111	0.42	-	-			3	40 × 40 × 160 mm³	80		-	-	34.5	-	-	-	-	34.4	-	-	-	-	0.997101	-	-
93	/Bal21/	kaolinitic-illitic clay	Russian Federation	Nikitsky	-	-	600	02:00:00	10	CEM I	-		1	90	0.111111	0.42	-	-			3	40 × 40 × 160 mm³	80		-	-	34.5	-	-	-	-	35.5	-	-	-	-	1.02899	-	-
94	/Bal21/	kaolinitic-illitic clay	Russian Federation	Nikitsky	-	-	700	02:00:00	10	CEM I	-		1	90	0.111111	0.42	-	-			3	40 × 40 × 160 mm³	80		-	-	34.5	-	-	-	-	36.4	-	-	-	-	1.05507	-	-
95	/Bal21/	kaolinitic-illitic clay	Russian Federation	Nikitsky	-	-	800	02:00:00	10	CEM I	-		1	90	0.111111	0.42	-	-			3	40 × 40 × 160 mm³	80		-	-	34.5	-	-	-	-	34.3	-	-	-	-	0.994203	-	-
96	/Bal21/	kaolinitic-illitic clay	Russian Federation	Nikitsky	-	-	900	02:00:00	10	CEM I	-		1	90	0.111111	0.42	-	-			3	40 × 40 × 160 mm³	80		-	-	34.5	-	-	-	-	34.2	-	-	-	-	0.991304	-	-
97	/Bal21/	illitic-kaolinitic clay	Russian Federation	Staroshaigovsky	-	-	200	02:00:00	10	CEM I	-		1	90	0.111111	0.42	-	-			3	40 × 40 × 160 mm³	80		-	-	34.5	-	-	-	-	31.2	-	-	-	-	0.904348	-	-
98	/Bal21/	illitic-kaolinitic clay	Russian Federation	Staroshaigovsky	-	-	400	02:00:00	10	CEM I	-		1	90	0.111111	0.42	-	-			3	40 × 40 × 160 mm³	80		-	-	34.5	-	-	-	-	31.4	-	-	-	-	0.910145	-	-
99	/Bal21/	illitic-kaolinitic clay	Russian Federation	Staroshaigovsky	-	-	600	02:00:00	10	CEM I	-		1	90	0.111111	0.42	-	-			3	40 × 40 × 160 mm³	80		-	-	34.5	-	-	-	-	32.3	-	-	-	-	0.936232	-	-
100	/Bal21/	illitic-kaolinitic clay	Russian Federation	Staroshaigovsky	-	-	700	02:00:00	10	CEM I	-		1	90	0.111111	0.42	-	-			3	40 × 40 × 160 mm³	80		-	-	34.5	-	-	-	-	32.7	-	-	-	-	0.947826	-	-
101	/Bal21/	illitic-kaolinitic clay	Russian Federation	Staroshaigovsky	-	-	800	02:00:00	10	CEM I	-		1	90	0.111111	0.42	-	-			3	40 × 40 × 160 mm³	80		-	-	34.5	-	-	-	-	31.8	-	-	-	-	0.921739	-	-
102	/Bal21/	illitic-kaolinitic clay	Russian Federation	Staroshaigovsky	-	-	900	02:00:00	10	CEM I	-		1	90	0.111111	0.42	-	-			3	40 × 40 × 160 mm³	80		-	-	34.5	-	-	-	-	31.4	-	-	-	-	0.910145	-	-
103	/Dan19/	kaolinitic clay	-	Clay A	pilot scale rotary kiln	-	800	00:45:00	20	CEM I	42.5	R	0.97	80	0.257732	0.5	-	-	quartz sand	0/2 mm	3	40 × 40 × 160 mm³	20 / W	20 / W	-	-	-	-	-	-	-	-	-	-	-	1.26	1.22	-	-
104	/Dan19/	kaolinitic clay	-	Clay A	pilot scale rotary kiln	-	800	00:45:00	35	CEM I	42.5	R	0.97	65	0.555115	0.5	-	-	quartz sand	0/2 mm	3	40 × 40 × 160 mm³	20 / W	20 / W	-	-	-	-	-	-	-	-	-	-	-	1.09	1.15	-	-
105	/Dan19/	kaolinitic clay	-	Clay A	pilot scale rotary kiln	-	800	00:45:00	50	CEM I	42.5	R	0.97	50	1.03093	0.5	SP	1.5	quartz sand	0/2 mm	3	40 × 40 × 160 mm³	20 / W	20 / W	-	-	-	-	-	-	-	-	-	-	-	0.71	1.09	-	-
106	/Dan19/	smectitic marl	-	Clay B	pilot scale rotary kiln	-	800	00:45:00	20	CEM I	42.5	R	0.97	80	0.257732	0.5	-	-	quartz sand	0/2 mm	3	40 × 40 × 160 mm³	20 / W	20 / W	-	-	-	-	-	-	-	-	-	-	-	0.95	1.07	-	-
107	/Dan19/	smectitic marl	-	Clay B	pilot scale rotary kiln	-	800	00:45:00	35	CEM I	42.5	R	0.97	65	0.555115	0.5	-	-	quartz sand	0/2 mm	3	40 × 40 × 160 mm³	20 / W	20 / W	-	-	-	-	-	-	-	-	-	-	-	0.92	1.06	-	-
108	/Dan19/	smectitic marl	-	Clay B	pilot scale rotary kiln	-	800	00:45:00	50	CEM I	42.5	R	0.97	50	1.03093	0.5	SP	1	quartz sand	0/2 mm	3	40 × 40 × 160 mm³	20 / W	20 / W	-	-	-	-	-	-	-	-	-	-	-	0.84	0.95	-	-
109	/Dan18/	kaolinitic clay	-	Clay A	pilot scale rotary kiln	-	700	00:45:00	20	CEM I	42.5	R	0.97	80	0.257732	0.5	-	-	quartz sand	0/2 mm	3	40 × 40 × 160 mm³	20 / W	20 / W	-	-	55.2	-	-	-	-	62.2	-	-	-	-	1.12681	-	-
110	/Dan18/	kaolinitic clay	-	Clay A	pilot scale rotary kiln	-	725	00:45:00	20	CEM I	42.5	R	0.97	80	0.257732	0.5	-	-	quartz sand	0/2 mm	3	40 × 40 × 160 mm³	20 / W	20 / W	-	-	55.2	-	-	-	-	63.8	-	-	-	-	1.1558	-	-
111	/Dan18/	kaolinitic clay	-	Clay A	pilot scale rotary kiln	-	750	00:45:00	20	CEM I	42.5	R	0.97	80	0.257732	0.5	-	-	quartz sand	0/2 mm	3	40 × 40 × 160 mm³	20 / W	20 / W	-	-	55.2	-	-	-	-	63.9	-	-	-	-	1.15761	-	-
112	/Dan18/	kaolinitic clay	-	Clay A	pilot scale rotary kiln	-	775	00:45:00	20	CEM I	42.5	R	0.97	80	0.257732	0.5	-	-	quartz sand	0/2 mm	3	40 × 40 × 160 mm³	20 / W	20 / W	-	-	55.2	-	-	-	-	64.7	-	-	-	-	1.1721	-	-
113	/Dan18/	kaolinitic clay	-	Clay A	pilot scale rotary kiln	-	800	00:45:00	20	CEM I	42.5	R	0.97	80	0.257732	0.5	-	-	quartz sand	0/2 mm	3	40 × 40 × 160 mm³	20 / W	20 / W	-	-	55.2	-	-	-	-	62.5	-	-	-	-	1.13225	-	-
114	/Dan18/	smectitic marl	-	Clay B	pilot scale rotary kiln	-	700	00:45:00	20	CEM I	42.5	R	0.97	80	0.257732	0.5	-	-	quartz sand	0/2 mm	3	40 × 40 × 160 mm³	20 / W	20 / W	-	-	55.3	-	-	-	-	53.2	-	-	-	-	0.962025	-	-
115	/Dan18/	smectitic marl	-	Clay B	pilot scale rotary kiln	-	750	00:45:00	20	CEM I	42.5	R	0.97	80	0.257732	0.5	-	-	quartz sand	0/2 mm	3	40 × 40 × 160 mm³	20 / W	20 / W	-	-	55.3	-	-	-	-	56.8	-	-	-	-	1.02712	-	-
116	/Dan18/	smectitic marl	-	Clay B	pilot scale rotary kiln	-	800	00:45:00	20	CEM I	42.5	R	0.97	80	0.257732	0.5	-	-	quartz sand	0/2 mm	3	40 × 40 × 160 mm³	20 / W	20 / W	-	-	55.3	-	-	-	-	61.6	-	-	-	-	1.11392	-	-
117	/Dan18/	smectitic marl	-	Clay B	pilot scale rotary kiln	-	850	00:45:00	20	CEM I	42.5	R	0.97	80	0.257732	0.5	-	-	quartz sand	0/2 mm	3	40 × 40 × 160 mm³	20 / W	20 / W	-	-	55.3	-	-	-	-	56.1	-	-	-	-	1.01447	-	-
118	/Dan18/	smectitic marl	-	Clay B	pilot scale rotary kiln	-	900	00:45:00	20	CEM I	42.5	R	0.97	80	0.257732	0.5	-	-	quartz sand	0/2 mm	3	40 × 40 × 160 mm³	20 / W	20 / W	-	-	55.3	-	-	-	-	52.2	-	-	-	-	0.943942	-	-
119	/Dan18/	smectitic marl	-	Clay B	pilot scale rotary kiln	-	950	00:45:00	20	CEM I	42.5	R	0.97	80	0.257732	0.5	-	-	quartz sand	0/2 mm	3	40 × 40 × 160 mm³	20 / W	20 / W	-	-	55.3	-	-	-	-	50.2	-	-	-	-	0.907776	-	-
120	/Dan18/	smectitic marl	-	Clay B	pilot scale rotary kiln	-	1000	00:45:00	20	CEM I	42.5	R	0.97	80	0.257732	0.5	-	-	quartz sand	0/2 mm	3	40 × 40 × 160 mm³	20 / W	20 / W	-	-	55.3	-	-	-	-	51.1	-	-	-	-	0.924051	-	-
121	/Mer20/	illitic shale	-	MI1	-	-	950	-	15	CEM I	-	-	1	85	0.176471	0.5	SP	1.5	quartz sand	0/2 mm	3	40 × 40 × 160 mm³	20 / W	20 / W	17.1	35.7	46.6	-	53.6	13.77	31.9	49.2	-	58.4	0.805263	0.893557	1.05579	-	1.08955
122	/Mer20/	illitic shale	-	MI1	-	-	950	-	25	CEM I	-	-	1	75	0.333333	0.5	SP	1.5	quartz sand	0/2 mm	3	40 × 40 × 160 mm³	20 / W	20 / W	17.1	35.7	46.6	-	53.6	11.18	30.3	45	-	56.5	0.653801	0.848739	0.965665	-	1.0541
123	/Mer20/	illitic shale	-	MI1	-	-	950	-	35	CEM I	-	-	1	65	0.538462	0.5	SP	1.5	quartz sand	0/2 mm	3	40 × 40 × 160 mm³	20 / W	20 / W	17.1	35.7	46.6	-	53.6	8.95	28.6	40.8	-	55.1	0.523392	0.80112	0.875536	-	1.02799
124	/Mer20/	illitic shale	-	MI2	-	-	950	-	15	CEM I	-	-	1	85	0.176471	0.5	SP	1.5	quartz sand	0/2 mm	3	40 × 40 × 160 mm³	20 / W	20 / W	17.3	36	46.6	-	53.5	12	30.7	43.5	-	55.6	0.693642	0.852778	0.933476	-	1.03925
125	/Mer20/	illitic shale	-	MI2	-	-	950	-	25	CEM I	-	-	1	75	0.333333	0.5	SP	1.5	quartz sand	0/2 mm	3	40 × 40 × 160 mm³	20 / W	20 / W	17.3	36	46.6	-	53.5	10.4	27.2	40.1	-	53.5	0.601156	0.755556	0.860515	-	1
126	/Mer20/	illitic shale	-	MI2	-	-	950	-	35	CEM I	-	-	1	65	0.538462	0.5	SP	1.5	quartz sand	0/2 mm	3	40 × 40 × 160 mm³	20 / W	20 / W	17.3	36	46.6	-	53.5	8.7	22	32.3	-	46.2	0.50289	0.611111	0.693133	-	0.863551
127	/Jaf20/	smectitic-kaolinitic clay	-	CC	-	-	750	03:00:00	20	CEM I	-	-	1	80	0.25	0.48	SP	0.642	quartz sand	0/2 mm	2.7	cyl. Ø: 150 mm, h: 150 mm	23 / 100	23 / 100		25.8	28.52	-	-		22.5	32	-	-		0.872093	1.12202	-	-
128	/Msi20/	illitic clay	Germany	I1	laboratory-scale rotary	-	850	-	15	CEM I	42.5	R	1	85	0.176471	0.5	SP	0.36	quartz sand	0/2 mm	3	40 × 40 × 160 mm³	20 / W	20 / W	29.9	46.4	57	-	-	22.6	36.9	46.3	-	-	0.755853	0.795259	0.812281	-	-
129	/Msi20/	illitic clay	Germany	I1	laboratory-scale rotary	-	900	-	15	CEM I	42.5	R	1	85	0.176471	0.5	SP	0.36	quartz sand	0/2 mm	3	40 × 40 × 160 mm³	20 / W	20 / W	29.9	46.4	57	-	-	22.8	36.1	47.6	-	-	0.762542	0.778017	0.835088	-	-
130	/Msi20/	illitic clay	Germany	I2	laboratory-scale rotary	-	850	-	15	CEM I	42.5	R	1	85	0.176471	0.5	SP	0.36	quartz sand	0/2 mm	3	40 × 40 × 160 mm³	20 / W	20 / W	29.9	46.4	57	-	-	25.2	36.5	49.1	-	-	0.842809	0.786638	0.861404	-	-
131	/Msi20/	illitic clay	Germany	I2	laboratory-scale rotary	-	900	-	15	CEM I	42.5	R	1	85	0.176471	0.5	SP	0.36	quartz sand	0/2 mm	3	40 × 40 × 160 mm³	20 / W	20 / W	29.9	46.4	57	-	-	24.4	37.9	47.7	-	-	0.816054	0.81681	0.836842	-	-
132	/Msi20/	kaolinitic clay	Germany	K1	laboratory-scale rotary	-	650	-	15	CEM I	42.5	R	1	85	0.176471	0.5	SP	0.36	quartz sand	0/2 mm	3	40 × 40 × 160 mm³	20 / W	20 / W	29.9	46.4	57	-	-	27.4	41.7	56.9	-	-	0.916388	0.898707	0.998246	-	-
133	/Msi20/	kaolinitic clay	Germany	K1	laboratory-scale rotary	-	900	-	15	CEM I	42.5	R	1	85	0.176471	0.5	SP	0.36	quartz sand	0/2 mm	3	40 × 40 × 160 mm³	20 / W	20 / W	29.9	46.4	57	-	-	26.7	37.3	50	-	-	0.892977	0.803879	0.877193	-	-
134	/Msi20/	illitic-kaolinitic clay	Germany	B1	laboratory-scale rotary	-	650	-	15	CEM I	42.5	R	1	85	0.176471	0.5	SP	0.36	quartz sand	0/2 mm	3	40 × 40 × 160 mm³	20 / W	20 / W	29.9	46.4	57	-	-	26.4	40.4	55	-	-	0.882943	0.87069	0.964912	-	-
135	/Msi20/	illitic-kaolinitic clay	Germany	B1	laboratory-scale rotary	-	900	-	15	CEM I	42.5	R	1	85	0.176471	0.5	SP	0.36	quartz sand	0/2 mm	3	40 × 40 × 160 mm³	20 / W	20 / W	29.9	46.4	57	-	-	27.6	40.1	51.9	-	-	0.923077	0.864224	0.910526	-	-
136	/Dan20/	smectitic clay	Germany?	Sm	pilot scale rotary kiln	-	800	00:45:00	20	CEM I	42.5	R	1	80	0.25	0.5	-	-	quartz sand	0/2 mm	3	40 × 40 × 160 mm³	20 / W	20 / W	-	-	-	-	-	-	-	-	-	-	-	-	0.95	-	-
137	/Dan20/	smectitic clay	Germany?	Sm-Ca	pilot scale rotary kiln	-	800	00:45:00	20	CEM I	42.5	R	1	80	0.25	0.5	-	-	quartz sand	0/2 mm	3	40 × 40 × 160 mm³	20 / W	20 / W	-	-	-	-	-	-	-	-	-	-	-	-	1.13	-	-
138	/Dan20/	illitic clay	Germany?	Ill	pilot scale rotary kiln	-	800	00:45:00	20	CEM I	42.5	R	1	80	0.25	0.5	-	-	quartz sand	0/2 mm	3	40 × 40 × 160 mm³	20 / W	20 / W	-	-	-	-	-	-	-	-	-	-	-	-	0.85	-	-
139	/Dan20/	illitic clay	Germany?	Ill-Ca	pilot scale rotary kiln	-	800	00:45:00	20	CEM I	42.5	R	1	80	0.25	0.5	-	-	quartz sand	0/2 mm	3	40 × 40 × 160 mm³	20 / W	20 / W	-	-	-	-	-	-	-	-	-	-	-	-	1.01	-	-
140	/Ira19a/	illitic shale	Argentina	LUT	laboratory furnace	-	900	-	25	CEM I	42.5	R	1	75	0.333333	0.5	-	-	quartz sand	0/2 mm	3	40 × 40 × 160 mm³	20 / W	20 / W	27.3	37.5	47.2	-	55.1	21.9	30.4	42.1	-	52.4	0.802198	0.810667	0.891949	-	0.950998
141	/Ira19a/	illitic shale	Argentina	LUT	laboratory furnace	-	1000	-	25	CEM I	42.5	R	1	75	0.333333	0.5	-	-	quartz sand	0/2 mm	3	40 × 40 × 160 mm³	20 / W	20 / W	27.3	37.5	47.2	-	55.1	20	27.6	40.6	-	52	0.732601	0.736	0.860169	-	0.943739
142	/Ira19a/	illitic shale	Argentina	LUT	laboratory furnace	-	1100	-	25	CEM I	42.5	R	1	75	0.333333	0.5	-	-	quartz sand	0/2 mm	3	40 × 40 × 160 mm³	20 / W	20 / W	27.3	37.5	47.2	-	55.1	21.3	29.2	45.9	-	55	0.78022	0.778667	0.972458	-	0.998185
143	/Ira19a/	illitic shale	Argentina	HET	laboratory furnace	-	900	-	25	CEM I	42.5	R	1	75	0.333333	0.5	-	-	quartz sand	0/2 mm	3	40 × 40 × 160 mm³	20 / W	20 / W	27.3	37.5	47.2	-	55.1	20.8	30.4	39.7	-	57.4	0.761905	0.810667	0.841102	-	1.04174
144	/Ira19a/	illitic shale	Argentina	HET	laboratory furnace	-	1000	-	25	CEM I	42.5	R	1	75	0.333333	0.5	-	-	quartz sand	0/2 mm	3	40 × 40 × 160 mm³	20 / W	20 / W	27.3	37.5	47.2	-	55.1	19.9	27.1	42.4	-	54.7	0.728938	0.722667	0.898305	-	0.99274
145	/Ira19a/	illitic shale	Argentina	HET	laboratory furnace	-	1100	-	25	CEM I	42.5	R	1	75	0.333333	0.5	-	-	quartz sand	0/2 mm	3	40 × 40 × 160 mm³	20 / W	20 / W	27.3	37.5	47.2	-	55.1	20.8	27.7	40.7	-	57.2	0.761905	0.738667	0.862288	-	1.03811
146	/Ira19b/	illitic shale	Argentina	IC01	laboratory furnace	-	950	-	25	CEM I	42.5	-	1	75	0.333333	0.5	-	-	quartz sand	0/2 mm	3	40 × 40 × 160 mm³	20 / W	20 / W	-	-	-	-	-	-	-	-	-	-	-	0.85	0.87	-	0.97
147	/Ira19b/	illitic shale	Argentina	IC02	laboratory furnace	-	950	-	25	CEM I	42.5	-	1	75	0.333333	0.5	-	-	quartz sand	0/2 mm	3	40 × 40 × 160 mm³	20 / W	20 / W	-	-	-	-	-	-	-	-	-	-	-	0.85	0.93	-	0.99
148	/Ira19b/	illitic shale	Argentina	IC03	laboratory furnace	-	950	-	25	CEM I	42.5	-	1	75	0.333333	0.5	-	-	quartz sand	0/2 mm	3	40 × 40 × 160 mm³	20 / W	20 / W	-	-	-	-	-	-	-	-	-	-	-	0.83	0.87	-	1.02
149	/Ira19b/	illitic shale	Argentina	IC04	laboratory furnace	-	950	-	25	CEM I	42.5	-	1	75	0.333333	0.5	-	-	quartz sand	0/2 mm	3	40 × 40 × 160 mm³	20 / W	20 / W	-	-	-	-	-	-	-	-	-	-	-	0.87	0.96	-	1.04
150	/Ira19b/	illitic shale	Argentina	IC05	laboratory furnace	-	950	-	25	CEM I	42.5	-	1	75	0.333333	0.5	-	-	quartz sand	0/2 mm	3	40 × 40 × 160 mm³	20 / W	20 / W	-	-	-	-	-	-	-	-	-	-	-	0.78	0.86	-	0.96
151	/Ira19b/	illitic shale	Argentina	IC06	laboratory furnace	-	950	-	25	CEM I	42.5	-	1	75	0.333333	0.5	-	-	quartz sand	0/2 mm	3	40 × 40 × 160 mm³	20 / W	20 / W	-	-	-	-	-	-	-	-	-	-	-	0.76	0.86	-	1.05
152	/Ira19b/	kaolinitic shale	Argentina	KC01	laboratory furnace	-	600	-	25	CEM I	42.5	-	1	75	0.333333	0.5	-	-	quartz sand	0/2 mm	3	40 × 40 × 160 mm³	20 / W	20 / W	-	-	-	-	-	-	-	-	-	-	-	0.85	1.04	-	0.97
153	/Ira19b/	kaolinitic shale	Argentina	KC02	laboratory furnace	-	600	-	25	CEM I	42.5	-	1	75	0.333333	0.5	-	-	quartz sand	0/2 mm	3	40 × 40 × 160 mm³	20 / W	20 / W	-	-	-	-	-	-	-	-	-	-	-	0.96	1.18	-	1.14
154	/Moh16/	illitic marl	Algeria	CM 500°C-5h	laboratory furnace	-	500	05:00	10	CEM I	-	-	1	90	0.111111	0.5	-	-	quartz sand	0/2 mm	3	40 × 40 × 160 mm³	20 / W	20 / W	16.2	26.9	41.7	-	45.5	17.3	27.1	34.1	-	38.9	1.0679	1.00743	0.817746	-	0.854945
155	/Moh16/	illitic marl	Algeria	CM 600°C-2h	laboratory furnace	-	600	02:00	10	CEM I	-	-	1	90	0.111111	0.5	-	-	quartz sand	0/2 mm	3	40 × 40 × 160 mm³	20 / W	20 / W	16.2	26.9	41.7	-	45.5	20	28.1	39.4	-	42	1.23457	1.04461	0.944844	-	0.923077
156	/Moh16/	illitic marl	Algeria	CM 600°C-3h	laboratory furnace	-	600	03:00	10	CEM I	-	-	1	90	0.111111	0.5	-	-	quartz sand	0/2 mm	3	40 × 40 × 160 mm³	20 / W	20 / W	16.2	26.9	41.7	-	45.5	17.7	27.6	39.4	-	43.4	1.09259	1.02602	0.944844	-	0.953846
157	/Moh16/	illitic marl	Algeria	CM 600°C-5h	laboratory furnace	-	600	05:00	10	CEM I	-	-	1	90	0.111111	0.5	-	-	quartz sand	0/2 mm	3	40 × 40 × 160 mm³	20 / W	20 / W	16.2	26.9	41.7	-	45.5	15.4	30.4	39.6	-	44.2	0.950617	1.13011	0.94964	-	0.971429
158	/Moh16/	illitic marl	Algeria	CM 700°C-2h	laboratory furnace	-	700	02:00	10	CEM I	-	-	1	90	0.111111	0.5	-	-	quartz sand	0/2 mm	3	40 × 40 × 160 mm³	20 / W	20 / W	16.2	26.9	41.7	-	45.5	18.6	27.2	39.2	-	43.6	1.14815	1.01115	0.940048	-	0.958242
159	/Moh16/	illitic marl	Algeria	CM 700°C-3h	laboratory furnace	-	700	03:00	10	CEM I	-	-	1	90	0.111111	0.5	-	-	quartz sand	0/2 mm	3	40 × 40 × 160 mm³	20 / W	20 / W	16.2	26.9	41.7	-	45.5	18.2	32	41	-	45	1.12346	1.18959	0.983213	-	0.989011
160	/Moh16/	illitic marl	Algeria	CM 700°C-5h	laboratory furnace	-	700	05:00	10	CEM I	-	-	1	90	0.111111	0.5	-	-	quartz sand	0/2 mm	3	40 × 40 × 160 mm³	20 / W	20 / W	16.2	26.9	41.7	-	45.5	17.9	37.9	42.4	-	45.9	1.10494	1.40892	1.01679	-	1.00879
161	/Moh16/	illitic marl	Algeria	CM 800°C-2h	laboratory furnace	-	800	02:00	10	CEM I	-	-	1	90	0.111111	0.5	-	-	quartz sand	0/2 mm	3	40 × 40 × 160 mm³	20 / W	20 / W	16.2	26.9	41.7	-	45.5	18	31.7	42.2	-	44.8	1.11111	1.17844	1.01199	-	0.984615
162	/Moh16/	illitic marl	Algeria	CM 800°C-3h	laboratory furnace	-	800	03:00	10	CEM I	-	-	1	90	0.111111	0.5	-	-	quartz sand	0/2 mm	3	40 × 40 × 160 mm³	20 / W	20 / W	16.2	26.9	41.7	-	45.5	18.4	32.5	42.6	-	45.9	1.1358	1.20818	1.02158	-	1.00879
163	/Moh16/	illitic marl	Algeria	CM 800°C-5h	laboratory furnace	-	800	05:00	10	CEM I	-	-	1	90	0.111111	0.5	-	-	quartz sand	0/2 mm	3	40 × 40 × 160 mm³	20 / W	20 / W	16.2	26.9	41.7	-	45.5	19.8	36.7	43.4	-	46.3	1.22222	1.36431	1.04077	-	1.01758
164	/Moh16/	illitic marl	Algeria	CM 1000°C-2h	laboratory furnace	-	1000	02:00	10	CEM I	-	-	1	90	0.111111	0.5	-	-	quartz sand	0/2 mm	3	40 × 40 × 160 mm³	20 / W	20 / W	16.2	26.9	41.7	-	45.5	13.5	31.1	38.64	-	42	0.833333	1.15613	0.926619	-	0.923077
165	/Tay15/	kaolin	USA	K	laboratory furnace	-	650	01:00	15	CEM I	-	-	1	85	0.176471	0.48	-	-	quartz sand	0/2 mm	2.75	cubes 50 mm	23 / W	23 / W	-	33.2	38.8	-	40.6	-	40.1	51	-	50.3	-	1.20783	1.31443	-	1.23892
166	/Tay15/	kaolinite-calcium bentonite	USA	KCaB	laboratory furnace	-	930	01:00	15	CEM I	-	-	1	85	0.176471	0.48	-	-	quartz sand	0/2 mm	2.75	cubes 50 mm	23 / W	23 / W	-	33.2	38.8	-	40.6	-	35.4	36.8	-	46	-	1.06627	0.948454	-	1.133
167	/Tay15/	kaolinite-sodium bentonite	USA	KNaB	laboratory furnace	-	830	01:00	15	CEM I	-	-	1	85	0.176471	0.48	-	-	quartz sand	0/2 mm	2.75	cubes 50 mm	23 / W	23 / W	-	33.2	38.8	-	40.6	-	36.8	44.3	-	47.5	-	1.10843	1.14175	-	1.16995
168	/Tir14/	kaolinitic clay	Argentina	MK1	laboratory furnace	< 4 mm	700	-	30	CEM I	40	-	1	70	0.428571	0.5	-	-	quartz sand	0/2 mm	3	cubes 25 mm	20 / W	20 / W	-	-	-	-	-	-	-	-	-	-	-	0.8	0.99	-	1.11
169	/Tir14/	kaolinitic clay	Argentina	MK2	laboratory furnace	< 4 mm	700	-	30	CEM I	40	-	1	70	0.428571	0.5	-	-	quartz sand	0/2 mm	3	cubes 25 mm	20 / W	20 / W	-	-	-	-	-	-	-	-	-	-	-	1.05	1.27	-	1.41
170	/Tir14/	kaolinitic clay	Argentina	MK3	laboratory furnace	< 4 mm	700	-	30	CEM I	40	-	1	70	0.428571	0.5	-	-	quartz sand	0/2 mm	3	cubes 25 mm	20 / W	20 / W	-	-	-	-	-	-	-	-	-	-	-	0.89	1.08	-	1.18
171	/Tir14/	kaolinitic clay	Argentina	MK4	laboratory furnace	< 4 mm	700	-	30	CEM I	40	-	1	70	0.428571	0.5	-	-	quartz sand	0/2 mm	3	cubes 25 mm	20 / W	20 / W	-	-	-	-	-	-	-	-	-	-	-	0.66	0.95	-	1.02
172	/Tir14/	kaolinitic-illitic clay	Argentina	MK5	laboratory furnace	< 4 mm	700	-	30	CEM I	40	-	1	70	0.428571	0.5	-	-	quartz sand	0/2 mm	3	cubes 25 mm	20 / W	20 / W	-	-	-	-	-	-	-	-	-	-	-	0.67	0.81	-	0.84
173	/Aka15/	kaolinitic clay	Lybia	Sebha (A)	-	6.35-12.7 mm	800	02:00	10	CEM I	-	-	1	90	0.111111	0.46	-	-	quartz sand	0/1.18 mm	2.75	cubes 50 mm	23 / W	23 / W	-	33.9	39.6	-	43	-	35	45	-	48.1	-	1.03245	1.13636	-	1.1186
174	/Aka15/	kaolinitic clay	Lybia	Sebha (A)	-	6.35-12.7 mm	800	02:00	15	CEM I	-	-	1	85	0.176471	0.46	-	-	quartz sand	0/1.18 mm	2.75	cubes 50 mm	23 / W	23 / W	-	33.9	39.6	-	43	-	32	40.1	-	39.9	-	0.943953	1.01263	-	0.927907
175	/Aka15/	kaolinitic clay	Lybia	Sebha (A)	-	6.35-12.7 mm	800	02:00	20	CEM I	-	-	1	80	0.25	0.46	-	-	quartz sand	0/1.18 mm	2.75	cubes 50 mm	23 / W	23 / W	-	33.9	39.6	-	43	-	34.4	44.2	-	44.3	-	1.01475	1.11616	-	1.03023
176	/Aka15/	kaolinitic clay	Lybia	Temenhint (B)	-	6.35-12.7 mm	800	02:00	10	CEM I	-	-	1	90	0.111111	0.46	-	-	quartz sand	0/1.18 mm	2.75	cubes 50 mm	23 / W	23 / W	-	33.9	39.6	-	43	-	34.5	45	-	50.8	-	1.0177	1.13636	-	1.1814
177	/Aka15/	kaolinitic clay	Lybia	Temenhint (B)	-	6.35-12.7 mm	800	02:00	15	CEM I	-	-	1	85	0.176471	0.46	-	-	quartz sand	0/1.18 mm	2.75	cubes 50 mm	23 / W	23 / W	-	33.9	39.6	-	43	-	29.7	39.4	-	43	-	0.876106	0.994949	-	1
178	/Aka15/	kaolinitic clay	Lybia	Temenhint (B)	-	6.35-12.7 mm	800	02:00	20	CEM I	-	-	1	80	0.25	0.46	-	-	quartz sand	0/1.18 mm	2.75	cubes 50 mm	23 / W	23 / W	-	33.9	39.6	-	43	-	31.3	41.6	-	45.1	-	0.923304	1.05051	-	1.04884
179	/Aka15/	kaolinitic clay	Lybia	Alafya (′C)	-	6.35-12.7 mm	800	02:00	10	CEM I	-	-	1	90	0.111111	0.46	-	-	quartz sand	0/1.18 mm	2.75	cubes 50 mm	23 / W	23 / W	-	33.9	39.6	-	43	-	33.2	39.8	-	45	-	0.979351	1.00505	-	1.04651
180	/Aka15/	kaolinitic clay	Lybia	Alafya (′C)	-	6.35-12.7 mm	800	02:00	15	CEM I	-	-	1	85	0.176471	0.46	-	-	quartz sand	0/1.18 mm	2.75	cubes 50 mm	23 / W	23 / W	-	33.9	39.6	-	43	-	34	42.5	-	48.4	-	1.00295	1.07323	-	1.12558
181	/Aka15/	kaolinitic clay	Lybia	Alafya (′C)	-	6.35-12.7 mm	800	02:00	20	CEM I	-	-	1	80	0.25	0.46	-	-	quartz sand	0/1.18 mm	2.75	cubes 50 mm	23 / W	23 / W	-	33.9	39.6	-	43	-	30.1	39.2	-	39.8	-	0.887906	0.989899	-	0.925581
182	/Aka15/	kaolinitic clay	Lybia	Agar (D)	-	6.35-12.7 mm	800	02:00	10	CEM I	-	-	1	90	0.111111	0.46	-	-	quartz sand	0/1.18 mm	2.75	cubes 50 mm	23 / W	23 / W	-	33.9	39.6	-	43	-	34.6	43.8	-	49.7	-	1.02065	1.10606	-	1.15581
183	/Aka15/	kaolinitic clay	Lybia	Agar (D)	-	6.35-12.7 mm	800	02:00	15	CEM I	-	-	1	85	0.176471	0.46	-	-	quartz sand	0/1.18 mm	2.75	cubes 50 mm	23 / W	23 / W	-	33.9	39.6	-	43	-	32.9	42.2	-	43.9	-	0.970501	1.06566	-	1.02093
184	/Aka15/	kaolinitic clay	Lybia	Agar (D)	-	6.35-12.7 mm	800	02:00	20	CEM I	-	-	1	80	0.25	0.46	-	-	quartz sand	0/1.18 mm	2.75	cubes 50 mm	23 / W	23 / W	-	33.9	39.6	-	43	-	25.3	31.7	-	33.9	-	0.746313	0.800505	-	0.788372
185	/Aka15/	kaolinitic clay	Lybia	Tarout (E)	-	6.35-12.7 mm	800	02:00	10	CEM I	-	-	1	90	0.111111	0.46	-	-	quartz sand	0/1.18 mm	2.75	cubes 50 mm	23 / W	23 / W	-	33.9	39.6	-	43	-	35.5	47	-	47.4	-	1.0472	1.18687	-	1.10233
186	/Aka15/	kaolinitic clay	Lybia	Tarout (E)	-	6.35-12.7 mm	800	02:00	15	CEM I	-	-	1	85	0.176471	0.46	-	-	quartz sand	0/1.18 mm	2.75	cubes 50 mm	23 / W	23 / W	-	33.9	39.6	-	43	-	34.5	43.5	-	46	-	1.0177	1.09848	-	1.06977
187	/Aka15/	kaolinitic clay	Lybia	Tarout (E)	-	6.35-12.7 mm	800	02:00	20	CEM I	-	-	1	80	0.25	0.46	-	-	quartz sand	0/1.18 mm	2.75	cubes 50 mm	23 / W	23 / W	-	33.9	39.6	-	43	-	34.5	40.4	-	45.2	-	1.0177	1.0202	-	1.05116
188	/Tre18/	kaolinitic clay	Argentina	PK1	-	-	600	-	25	CEM I	-	-	1	75	0.333333	0.5	-	-	quartz sand	0/2 mm	3	40 × 40 × 160 mm³	20 / W	20 / W	-	34.5	46.6	-	53.8	-	31.4	48.5	-	50.8	-	0.910145	1.04077	-	0.944238
189	/Tre18/	kaolinitic clay	Argentina	PK2	-	-	600	-	25	CEM I	-	-	1	75	0.333333	0.5	-	-	quartz sand	0/2 mm	3	40 × 40 × 160 mm³	20 / W	20 / W	-	34.5	46.6	-	53.8	-	29.4	48	-	50	-	0.852174	1.03004	-	0.929368
190	/Hue18/	illitic-kaolinitic	-	PL1	pilot scale rotary kiln	-	600	-	25	CEM I	52.5	-	1	75	0.333333	0.5	-	-	quartz sand	0/2 mm	3	40 × 40 × 160 mm³	20 / W	20 / W	-	-	-	-	-	-	-	-	-	-	-	-	0.9191	-	-
191	/Hue18/	illitic-kaolinitic	-	PL1	pilot scale rotary kiln	-	650	-	25	CEM I	52.5	-	1	75	0.333333	0.5	-	-	quartz sand	0/2 mm	3	40 × 40 × 160 mm³	20 / W	20 / W	-	-	-	-	-	-	-	-	-	-	-	-	0.8109	-	-
192	/Hue18/	illitic-kaolinitic	-	PL1	pilot scale rotary kiln	-	700	-	25	CEM I	52.5	-	1	75	0.333333	0.5	-	-	quartz sand	0/2 mm	3	40 × 40 × 160 mm³	20 / W	20 / W	-	-	-	-	-	-	-	-	-	-	-	-	0.9198	-	-
193	/Hue18/	kaolinitic-illitic clay	-	PL2	pilot scale rotary kiln	-	600	-	25	CEM I	52.5	-	1	75	0.333333	0.5	-	-	quartz sand	0/2 mm	3	40 × 40 × 160 mm³	20 / W	20 / W	-	-	-	-	-	-	-	-	-	-	-	-	0.9021	-	-
194	/Hue18/	kaolinitic-illitic clay	-	PL2	pilot scale rotary kiln	-	650	-	25	CEM I	52.5	-	1	75	0.333333	0.5	-	-	quartz sand	0/2 mm	3	40 × 40 × 160 mm³	20 / W	20 / W	-	-	-	-	-	-	-	-	-	-	-	-	0.8264	-	-
195	/Hue18/	kaolinitic-illitic clay	-	PL2	pilot scale rotary kiln	-	700	-	25	CEM I	52.5	-	1	75	0.333333	0.5	-	-	quartz sand	0/2 mm	3	40 × 40 × 160 mm³	20 / W	20 / W	-	-	-	-	-	-	-	-	-	-	-	-	0.9915	-	-
196	/Hue18/	kaolinitic clay	-	PL7	pilot scale rotary kiln	-	600	-	25	CEM I	52.5	-	1	75	0.333333	0.5	-	-	quartz sand	0/2 mm	3	40 × 40 × 160 mm³	20 / W	20 / W	-	-	-	-	-	-	-	-	-	-	-	-	1.0038	-	-
197	/Hue18/	kaolinitic clay	-	PL7	pilot scale rotary kiln	-	650	-	25	CEM I	52.5	-	1	75	0.333333	0.5	-	-	quartz sand	0/2 mm	3	40 × 40 × 160 mm³	20 / W	20 / W	-	-	-	-	-	-	-	-	-	-	-	-	1.065	-	-
198	/Hue18/	kaolinitic clay	-	PL7	pilot scale rotary kiln	-	700	-	25	CEM I	52.5	-	1	75	0.333333	0.5	-	-	quartz sand	0/2 mm	3	40 × 40 × 160 mm³	20 / W	20 / W	-	-	-	-	-	-	-	-	-	-	-	-	0.888	-	-
199	/Hue18/	kaolinitic-illitic clay	-	PL1_80_PL7_20	pilot scale rotary kiln	-	600	-	25	CEM I	52.5	-	1	75	0.333333	0.5	-	-	quartz sand	0/2 mm	3	40 × 40 × 160 mm³	20 / W	20 / W	-	-	-	-	-	-	-	-	-	-	-	-	0.7012	-	-
200	/Hue18/	kaolinitic-illitic clay	-	PL1_80_PL7_20	pilot scale rotary kiln	-	650	-	25	CEM I	52.5	-	1	75	0.333333	0.5	-	-	quartz sand	0/2 mm	3	40 × 40 × 160 mm³	20 / W	20 / W	-	-	-	-	-	-	-	-	-	-	-	-	0.9368	-	-
201	/Hue18/	kaolinitic-illitic clay	-	PL1_80_PL7_20	pilot scale rotary kiln	-	700	-	25	CEM I	52.5	-	1	75	0.333333	0.5	-	-	quartz sand	0/2 mm	3	40 × 40 × 160 mm³	20 / W	20 / W	-	-	-	-	-	-	-	-	-	-	-	-	0.888	-	-
202	/Hue18/	kaolinitic-illitic clay	-	PL1_60_PL7_40	pilot scale rotary kiln	-	600	-	25	CEM I	52.5	-	1	75	0.333333	0.5	-	-	quartz sand	0/2 mm	3	40 × 40 × 160 mm³	20 / W	20 / W	-	-	-	-	-	-	-	-	-	-	-	-	0.9422	-	-
203	/Hue18/	kaolinitic-illitic clay	-	PL1_60_PL7_40	pilot scale rotary kiln	-	650	-	25	CEM I	52.5	-	1	75	0.333333	0.5	-	-	quartz sand	0/2 mm	3	40 × 40 × 160 mm³	20 / W	20 / W	-	-	-	-	-	-	-	-	-	-	-	-	0.9734	-	-
204	/Hue18/	kaolinitic-illitic clay	-	PL1_60_PL7_40	pilot scale rotary kiln	-	700	-	25	CEM I	52.5	-	1	75	0.333333	0.5	-	-	quartz sand	0/2 mm	3	40 × 40 × 160 mm³	20 / W	20 / W	-	-	-	-	-	-	-	-	-	-	-	-	0.9527	-	-
205	/Hue18/	kaolinitic-illitic clay	-	PL1_40_PL7_60	pilot scale rotary kiln	-	600	-	25	CEM I	52.5	-	1	75	0.333333	0.5	-	-	quartz sand	0/2 mm	3	40 × 40 × 160 mm³	20 / W	20 / W	-	-	-	-	-	-	-	-	-	-	-	-	0.8579	-	-
206	/Hue18/	kaolinitic-illitic clay	-	PL1_40_PL7_60	pilot scale rotary kiln	-	650	-	25	CEM I	52.5	-	1	75	0.333333	0.5	-	-	quartz sand	0/2 mm	3	40 × 40 × 160 mm³	20 / W	20 / W	-	-	-	-	-	-	-	-	-	-	-	-	0.8145	-	-
207	/Hue18/	kaolinitic-illitic clay	-	PL1_40_PL7_60	pilot scale rotary kiln	-	700	-	25	CEM I	52.5	-	1	75	0.333333	0.5	-	-	quartz sand	0/2 mm	3	40 × 40 × 160 mm³	20 / W	20 / W	-	-	-	-	-	-	-	-	-	-	-	-	0.9321	-	-
208	/Hue18/	kaolinitic-illitic clay	-	PL1_20_PL7_80	pilot scale rotary kiln	-	600	-	25	CEM I	52.5	-	1	75	0.333333	0.5	-	-	quartz sand	0/2 mm	3	40 × 40 × 160 mm³	20 / W	20 / W	-	-	-	-	-	-	-	-	-	-	-	-	0.9426	-	-
209	/Hue18/	kaolinitic-illitic clay	-	PL1_20_PL7_80	pilot scale rotary kiln	-	650	-	25	CEM I	52.5	-	1	75	0.333333	0.5	-	-	quartz sand	0/2 mm	3	40 × 40 × 160 mm³	20 / W	20 / W	-	-	-	-	-	-	-	-	-	-	-	-	0.9947	-	-
210	/Hue18/	kaolinitic-illitic clay	-	PL1_20_PL7_80	pilot scale rotary kiln	-	700	-	25	CEM I	52.5	-	1	75	0.333333	0.5	-	-	quartz sand	0/2 mm	3	40 × 40 × 160 mm³	20 / W	20 / W	-	-	-	-	-	-	-	-	-	-	-	-	0.9716	-	-
211	/Hue18/	kaolinitic-illitic clay	-	PL2_80_PL7_20	pilot scale rotary kiln	-	600	-	25	CEM I	52.5	-	1	75	0.333333	0.5	-	-	quartz sand	0/2 mm	3	40 × 40 × 160 mm³	20 / W	20 / W	-	-	-	-	-	-	-	-	-	-	-	-	0.9205	-	-
212	/Hue18/	kaolinitic-illitic clay	-	PL2_80_PL7_20	pilot scale rotary kiln	-	650	-	25	CEM I	52.5	-	1	75	0.333333	0.5	-	-	quartz sand	0/2 mm	3	40 × 40 × 160 mm³	20 / W	20 / W	-	-	-	-	-	-	-	-	-	-	-	-	0.855	-	-
213	/Hue18/	kaolinitic-illitic clay	-	PL2_80_PL7_20	pilot scale rotary kiln	-	700	-	25	CEM I	52.5	-	1	75	0.333333	0.5	-	-	quartz sand	0/2 mm	3	40 × 40 × 160 mm³	20 / W	20 / W	-	-	-	-	-	-	-	-	-	-	-	-	0.952	-	-
214	/Hue18/	kaolinitic-illitic clay	-	PL2_60_PL7_40	pilot scale rotary kiln	-	600	-	25	CEM I	52.5	-	1	75	0.333333	0.5	-	-	quartz sand	0/2 mm	3	40 × 40 × 160 mm³	20 / W	20 / W	-	-	-	-	-	-	-	-	-	-	-	-	0.838	-	-
215	/Hue18/	kaolinitic-illitic clay	-	PL2_60_PL7_40	pilot scale rotary kiln	-	650	-	25	CEM I	52.5	-	1	75	0.333333	0.5	-	-	quartz sand	0/2 mm	3	40 × 40 × 160 mm³	20 / W	20 / W	-	-	-	-	-	-	-	-	-	-	-	-	0.9495	-	-
216	/Hue18/	kaolinitic-illitic clay	-	PL2_60_PL7_40	pilot scale rotary kiln	-	700	-	25	CEM I	52.5	-	1	75	0.333333	0.5	-	-	quartz sand	0/2 mm	3	40 × 40 × 160 mm³	20 / W	20 / W	-	-	-	-	-	-	-	-	-	-	-	-	0.9404	-	-
217	/Hue18/	kaolinitic-illitic clay	-	PL2_40_PL7_60	pilot scale rotary kiln	-	600	-	25	CEM I	52.5	-	1	75	0.333333	0.5	-	-	quartz sand	0/2 mm	3	40 × 40 × 160 mm³	20 / W	20 / W	-	-	-	-	-	-	-	-	-	-	-	-	0.9676	-	-
218	/Hue18/	kaolinitic-illitic clay	-	PL2_40_PL7_60	pilot scale rotary kiln	-	650	-	25	CEM I	52.5	-	1	75	0.333333	0.5	-	-	quartz sand	0/2 mm	3	40 × 40 × 160 mm³	20 / W	20 / W	-	-	-	-	-	-	-	-	-	-	-	-	0.8673	-	-
219	/Hue18/	kaolinitic-illitic clay	-	PL2_40_PL7_60	pilot scale rotary kiln	-	700	-	25	CEM I	52.5	-	1	75	0.333333	0.5	-	-	quartz sand	0/2 mm	3	40 × 40 × 160 mm³	20 / W	20 / W	-	-	-	-	-	-	-	-	-	-	-	-	0.9296	-	-
220	/Hue18/	kaolinitic-illitic clay	-	PL2_20_PL7_80	pilot scale rotary kiln	-	600	-	25	CEM I	52.5	-	1	75	0.333333	0.5	-	-	quartz sand	0/2 mm	3	40 × 40 × 160 mm³	20 / W	20 / W	-	-	-	-	-	-	-	-	-	-	-	-	1.0114	-	-
221	/Hue18/	kaolinitic-illitic clay	-	PL2_20_PL7_80	pilot scale rotary kiln	-	650	-	25	CEM I	52.5	-	1	75	0.333333	0.5	-	-	quartz sand	0/2 mm	3	40 × 40 × 160 mm³	20 / W	20 / W	-	-	-	-	-	-	-	-	-	-	-	-	0.9933	-	-
222	/Hue18/	kaolinitic-illitic clay	-	PL2_20_PL7_80	pilot scale rotary kiln	-	700	-	25	CEM I	52.5	-	1	75	0.333333	0.5	-	-	quartz sand	0/2 mm	3	40 × 40 × 160 mm³	20 / W	20 / W	-	-	-	-	-	-	-	-	-	-	-	-	0.9636	-	-
223	/Lem18/	illitic clay	Argentina	L	-	-	900	-	25	CEM I	-	-	0.95	75	0.350877	0.5	-	-	quartz sand	0/2 mm	3	not specified	20 / W	20 / W	27	37.25	47.24	-	54.9	21.9	30.48	42.32	-	52.62	0.811111	0.818255	0.895851	-	0.95847
224	/Lem18/	illitic clay	Argentina	L	-	-	1000	-	25	CEM I	-	-	0.95	75	0.350877	0.5	-	-	quartz sand	0/2 mm	3	not specified	20 / W	20 / W	27	37.25	47.24	-	54.9	18.77	27.65	40.75	-	52.33	0.695185	0.742282	0.862616	-	0.953188
225	/Lem18/	illitic clay	Argentina	L	-	-	1100	-	25	CEM I	-	-	0.95	75	0.350877	0.5	-	-	quartz sand	0/2 mm	3	not specified	20 / W	20 / W	27	37.25	47.24	-	54.9	21.22	29.12	46.12	-	55.18	0.785926	0.781745	0.976291	-	1.0051
226	/Fri10/	kaolinitic paper sludge	-	CPS	-	-	650	02:00	10	CEM I	42.5	R	1	90	0.111111	0.5	-	-	quartz sand	0/2 mm	3	40 × 40 × 160 mm³	20 / W	20 / W	-	46.8	60.2	-	-	-	48.9	61.5	-	-	-	1.04487	1.02159	-	-
227	/Gon09/	calcined-clay brick	-	GB	-	-	850	-	10	CEM II/A	32	-	0.85-0.91	90	0.12-0.11	0.5	SP	-	river sand	fineness modulus: 2.37	1.5	cyl. Ø: 50 mm, h: 100 mm	24 / W	24 / W	-	-	41	-	-	-	-	39.8	-	-	-	-	0.970732	-	-
228	/Gon09/	calcined-clay brick	-	GB	-	-	850	-	20	CEM II/A	32	-	0.85-0.91	80	0.24-0.22	0.5	SP	0.2	river sand	fineness modulus: 2.37	1.5	cyl. Ø: 50 mm, h: 100 mm	24 / W	24 / W	-	-	41	-	-	-	-	38	-	-	-	-	0.926829	-	-
229	/Gon09/	calcined-clay brick	-	GB	-	-	850	-	30	CEM II/A	32	-	0.85-0.91	70	0.35-0.33	0.5	SP	0.3	river sand	fineness modulus: 2.37	1.5	cyl. Ø: 50 mm, h: 100 mm	24 / W	24 / W	-	-	41	-	-	-	-	32.9	-	-	-	-	0.802439	-	-
230	/Gon09/	calcined-clay brick	-	GB	-	-	850	-	40	CEM II/A	32	-	0.85-0.91	60	0.47-0.44	0.5	SP	0.3	river sand	fineness modulus: 2.37	1.5	cyl. Ø: 50 mm, h: 100 mm	24 / W	24 / W	-	-	41	-	-	-	-	26.5	-	-	-	-	0.646341	-	-
231	/Gon09/	metakaolin	-	Mk1	-	-	-	-	10	CEM II/A	32	-	0.85-0.91	90	0.12-0.11	0.5	SP	-	river sand	fineness modulus: 2.37	1.5	cyl. Ø: 50 mm, h: 100 mm	24 / W	24 / W	-	-	41	-	-	-	-	43.5	-	-	-	-	1.06098	-	-
232	/Gon09/	metakaolin	-	Mk1	-	-	-	-	20	CEM II/A	32	-	0.85-0.91	80	0.24-0.22	0.5	SP	0.2	river sand	fineness modulus: 2.37	1.5	cyl. Ø: 50 mm, h: 100 mm	24 / W	24 / W	-	-	41	-	-	-	-	47.8	-	-	-	-	1.16585	-	-
233	/Gon09/	metakaolin	-	Mk1	-	-	-	-	30	CEM II/A	32	-	0.85-0.91	70	0.35-0.33	0.5	SP	0.3	river sand	fineness modulus: 2.37	1.5	cyl. Ø: 50 mm, h: 100 mm	24 / W	24 / W	-	-	41	-	-	-	-	46.8	-	-	-	-	1.14146	-	-
234	/Gon09/	metakaolin	-	Mk1	-	-	-	-	40	CEM II/A	32	-	0.85-0.91	60	0.47-0.44	0.5	SP	0.3	river sand	fineness modulus: 2.37	1.5	cyl. Ø: 50 mm, h: 100 mm	24 / W	24 / W	-	-	41	-	-	-	-	44.7	-	-	-	-	1.09024	-	-
235	/Gon09/	metakaolin	-	Mk2	-	-	550	02:00	10	CEM II/A	32	-	0.85-0.91	90	0.12-0.11	0.5	SP	-	river sand	fineness modulus: 2.37	1.5	cyl. Ø: 50 mm, h: 100 mm	24 / W	24 / W	-	-	41	-	-	-	-	44.1	-	-	-	-	1.07561	-	-
236	/Gon09/	metakaolin	-	Mk2	-	-	550	02:00	20	CEM II/A	32	-	0.85-0.91	80	0.24-0.22	0.5	SP	0.2	river sand	fineness modulus: 2.37	1.5	cyl. Ø: 50 mm, h: 100 mm	24 / W	24 / W	-	-	41	-	-	-	-	56.9	-	-	-	-	1.3878	-	-
237	/Gon09/	metakaolin	-	Mk2	-	-	550	02:00	30	CEM II/A	32	-	0.85-0.91	70	0.35-0.33	0.5	SP	0.3	river sand	fineness modulus: 2.37	1.5	cyl. Ø: 50 mm, h: 100 mm	24 / W	24 / W	-	-	41	-	-	-	-	56.3	-	-	-	-	1.37317	-	-
238	/Gon09/	metakaolin	-	Mk2	-	-	550	02:00	40	CEM II/A	32	-	0.85-0.91	60	0.47-0.44	0.5	SP	0.3	river sand	fineness modulus: 2.37	1.5	cyl. Ø: 50 mm, h: 100 mm	24 / W	24 / W	-	-	41	-	-	-	-	53.6	-	-	-	-	1.30732	-	-
239	/Gut08/	metakaolin	Colombia	MKN	-	-	600	-	20	CEM I	-	-	1	80	0.25	0.48	-	-	not specified	not specified	2.75	not specified	not specified	not specified	-	35.8	45.5	-	53.9	-	39.3	49.8	-	56.7	-	1.09777	1.09451	-	1.05195
240	/Gut08/	metakaolin	Colombia	MKN	-	-	800	-	20	CEM I	-	-	1	80	0.25	0.48	-	-	not specified	not specified	2.75	not specified	not specified	not specified	-	35.8	45.5	-	53.9	-	40.2	52.4	-	62.2	-	1.12291	1.15165	-	1.15399
241	/Fri08/	kaolinitic paper sludge	-	CCW	-	-	700-800 °C	02:00	10	CEM I	42.5	R	1	90	0.111111	0.5	-	-	not specified	not specified	3	cubes 100 mm	20 / W	20 / W	-	48.54	58.14	-	63.1	-	49.16	60.22	-	63.9	-	1.01277	1.03578	-	1.01268
242	/O'Fa06/	illitic-kaolinitic clay	-	HTC QC	-	-	800 °C	02:00	10	CEM I	-	-	1	90	0.111111	0.5	-	-	not specified	not specified	3	cubes 100 mm	20 / W	20 / W	-	39.6	52.5	-	61.3	-	38.7	52.5	-	62.1	-	0.977273	1	-	1.01305
243	/O'Fa06/	illitic-kaolinitic clay	-	HTC QC	-	-	800 °C	02:00	20	CEM I	-	-	1	80	0.25	0.5	-	-	not specified	not specified	3	cubes 100 mm	20 / W	20 / W	-	39.6	52.5	-	61.3	-	32.2	46.8	-	59.3	-	0.813131	0.891429	-	0.967374
244	/O'Fa06/	illitic-kaolinitic clay	-	HTC QC	-	-	800 °C	02:00	30	CEM I	-	-	1	70	0.428571	0.5	-	-	not specified	not specified	3	cubes 100 mm	20 / W	20 / W	-	39.6	52.5	-	61.3	-	24.9	39.1	-	53.1	-	0.628788	0.744762	-	0.866232
245	/O'Fa06/	illitic-kaolinitic clay	-	HTC SC	-	-	800 °C	02:00	10	CEM I	-	-	1	90	0.111111	0.5	-	-	not specified	not specified	3	cubes 100 mm	20 / W	20 / W	-	39.6	52.5	-	61.3	-	38.2	52.5	-	58.1	-	0.964646	1	-	0.947798
246	/O'Fa06/	illitic-kaolinitic clay	-	HTC SC	-	-	800 °C	02:00	20	CEM I	-	-	1	80	0.25	0.5	-	-	not specified	not specified	3	cubes 100 mm	20 / W	20 / W	-	39.6	52.5	-	61.3	-	32.1	46.7	-	52.1	-	0.810606	0.889524	-	0.849918
247	/O'Fa06/	illitic-kaolinitic clay	-	HTC SC	-	-	800 °C	02:00	30	CEM I	-	-	1	70	0.428571	0.5	-	-	not specified	not specified	3	cubes 100 mm	20 / W	20 / W	-	39.6	52.5	-	61.3	-	25.1	40.8	-	48.7	-	0.633838	0.777143	-	0.794454
248	/He96/	Na-montmorillonite	-	NaM	muffle furnace	-	740	01:40	30	CEM I	-	-	1	70	0.428571	0.6-0.8	-	-	not specified	not specified	3	20 × 20 × 150 mm³	40 / W	40 / W	-	53.7	69.2	-	65.6	-	39.3	57.1	-	58.6	-	0.731844	0.825145	-	0.893293
249	/He96/	Na-montmorillonite	-	NaM	muffle furnace	-	830	01:40	30	CEM I	-	-	1	70	0.428571	0.6-0.8	-	-	not specified	not specified	3	20 × 20 × 150 mm³	40 / W	40 / W	-	53.7	69.2	-	65.6	-	48.1	78.1	-	72.7	-	0.895717	1.12861	-	1.10823
250	/He96/	Na-montmorillonite	-	NaM	muffle furnace	-	920	01:40	30	CEM I	-	-	1	70	0.428571	0.6-0.8	-	-	not specified	not specified	3	20 × 20 × 150 mm³	40 / W	40 / W	-	53.7	69.2	-	65.6	-	36.6	67.6	-	63.5	-	0.681564	0.976879	-	0.967988
251	/He96/	Ca-montmorillonite	-	CaM	muffle furnace	-	730	01:40	30	CEM I	-	-	1	70	0.428571	0.6-0.65	-	-	not specified	not specified	3	20 × 20 × 150 mm³	40 / W	40 / W	-	53.7	69.2	-	65.6	-	63	70.6	-	80.1	-	1.17318	1.02023	-	1.22104
252	/He96/	Ca-montmorillonite	-	CaM	muffle furnace	-	830	01:40	30	CEM I	-	-	1	70	0.428571	0.6-0.65	-	-	not specified	not specified	3	20 × 20 × 150 mm³	40 / W	40 / W	-	53.7	69.2	-	65.6	-	64.9	86.7	-	88.1	-	1.20857	1.25289	-	1.34299
253	/He96/	Ca-montmorillonite	-	CaM	muffle furnace	-	930	01:40	30	CEM I	-	-	1	70	0.428571	0.6-0.65	-	-	not specified	not specified	3	20 × 20 × 150 mm³	40 / W	40 / W	-	53.7	69.2	-	65.6	-	45.4	74.8	-	74.7	-	0.845438	1.08092	-	1.13872
254	/Bra18/	mixed clay	bulgaria	S	laboratory furnace	< 0.5	800	00:20	30	CEM I	52.5	-	1	70	0.428571	0.5	-	-	quartz sand	0/2 mm	3	40 × 40 × 160 mm³	20 / W	20 / W													0.84
255	/Bra18/	smectitic-kaolinitic clay	bulgaria	Ch	laboratory furnace	< 0.5	800	00:20	30	CEM I	52.5	-	1	70	0.428571	0.5	-	-	quartz sand	0/2 mm	3	40 × 40 × 160 mm³	20 / W	20 / W													1.11
256	/Bra18/	smectitic-kaolinitic clay	bulgaria	SK	laboratory furnace	< 0.5	800	00:20	30	CEM I	52.5	-	1	70	0.428571	0.5	-	-	quartz sand	0/2 mm	3	40 × 40 × 160 mm³	20 / W	20 / W													0.94
257	/Bra18/	smectitic clay	bulgaria	B	laboratory furnace	< 0.5	780	00:20	30	CEM I	52.5	-	1	70	0.428571	0.5	-	-	quartz sand	0/2 mm	3	40 × 40 × 160 mm³	20 / W	20 / W													1.05
258	/Bra18/	kaolin	bulgaria	K	laboratory furnace	< 0.5	800	00:20	30	CEM I	52.5	-	1	70	0.428571	0.5	-	-	quartz sand	0/2 mm	3	40 × 40 × 160 mm³	20 / W	20 / W													1.35
259	/Bra18/	mixed clay	bulgaria	M	laboratory furnace	< 0.5	800	00:20	30	CEM I	52.5	-	1	70	0.428571	0.5	-	-	quartz sand	0/2 mm	3	40 × 40 × 160 mm³	20 / W	20 / W													0.65
260	/Bra18/	mixed clay	bulgaria	D	laboratory furnace	< 0.5	780	00:20	30	CEM I	52.5	-	1	70	0.428571	0.5	-	-	quartz sand	0/2 mm	3	40 × 40 × 160 mm³	20 / W	20 / W													0.89
261	/Bra18/	illitic-smectitic clay	bulgaria	BB	laboratory furnace	< 0.5	800	00:20	30	CEM I	52.5	-	1	70	0.428571	0.5	-	-	quartz sand	0/2 mm	3	40 × 40 × 160 mm³	20 / W	20 / W													0.85
262	/Mou01/	kaolinitic clay	-	Sample 1	static laboratory furnace	-	750	02:00	30	CEM I	-	-	1	70	0.428571	0.5	-	-	quartz sand	0/2 mm	3	40 × 40 × 160 mm³	20 / W	20 / W			55					48.5					0.881818
263	/Mou01/	kaolinitic clay	-	Sample 2	static laboratory furnace	-	750	02:00	30	CEM I	-	-	1	70	0.428571	0.5	-	-	quartz sand	0/2 mm	3	40 × 40 × 160 mm³	20 / W	20 / W			55					49.7					0.903636
264	/Mai20, Mai21/	kaolinitic clay	Germany	KT	muffle furnace	-	800	00:30:00	-	-	-	-	-	-	-	-	-	-	-	-	-	-	-	-	-	-	-	-	-	-	-	-	-	-	-	-	-	-	-
265	/Mai20, Mai21/	chloride and mica-rich	Germany	KUP	muffle furnace	-	620	00:30:00	-	-	-	-	-	-	-	-	-	-	-	-	-	-	-	-	-	-	-	-	-	-	-	-	-	-	-	-	-	-	-
266	/Mai20, Mai21/	smectitic mixed clay	Germany	FUP	muffle furnace	-	650	00:30:00	-	-	-	-	-	-	-	-	-	-	-	-	-	-	-	-	-	-	-	-	-	-	-	-	-	-	-	-	-	-	-
267	/Mai20, Mai21/	kaolinitic clay	Germany	RKUP	muffle furnace	-	680	00:30:00	-	-	-	-	-	-	-	-	-	-	-	-	-	-	-	-	-	-	-	-	-	-	-	-	-	-	-	-	-	-	-
268	/Mai20, Mai21/	smectitic-kaolinitic clay	Germany	AC	muffle furnace	-	680	00:30:00	-	-	-	-	-	-	-	-	-	-	-	-	-	-	-	-	-	-	-	-	-	-	-	-	-	-	-	-	-	-	-
269	/Mai20, Mai21/	smectitic clay	Germany	SW	muffle furnace	-	810	00:30:00	-	-	-	-	-	-	-	-	-	-	-	-	-	-	-	-	-	-	-	-	-	-	-	-	-	-	-	-	-	-	-
270	/Mai20, Mai21/	kaolinitc clay	Germany	SCW	muffle furnace	-	620	00:30:00	-	-	-	-	-	-	-	-	-	-	-	-	-	-	-	-	-	-	-	-	-	-	-	-	-	-	-	-	-	-	-
271	/Mai20, Mai21/	kaolinitc clay	Germany	CCW	muffle furnace	-	660	00:30:00	-	-	-	-	-	-	-	-	-	-	-	-	-	-	-	-	-	-	-	-	-	-	-	-	-	-	-	-	-	-	-
272	/Mai20, Mai21/	smectitic clay	Germany	MOSM	muffle furnace	-	700	00:30:00	-	-	-	-	-	-	-	-	-	-	-	-	-	-	-	-	-	-	-	-	-	-	-	-	-	-	-	-	-	-	-
273	/Mai20, Mai21/	kaolinitc-smectitic clay	Germany	SLS	muffle furnace	-	740	00:30:00	-	-	-	-	-	-	-	-	-	-	-	-	-	-	-	-	-	-	-	-	-	-	-	-	-	-	-	-	-	-	-
274	/Mai20, Mai21/	kaolinitc clay	Germany	KS	muffle furnace	-	650	00:30:00	-	-	-	-	-	-	-	-	-	-	-	-	-	-	-	-	-	-	-	-	-	-	-	-	-	-	-	-	-	-	-
275	/Mai21/	kaolinitc-smectitic clay	Germany	OC	muffle furnace	-	680	00:30:00	-	-	-	-	-	-	-	-	-	-	-	-	-	-	-	-	-	-	-	-	-	-	-	-	-	-	-	-	-	-	-
276	/Lon22/	-	-	CY1	-	-	-	-	30	CEM I	42.5	N/R	1	70	0.428571	0.5	-	-	-	-	3	40 × 40 × 160 mm³	20 / W	20 / W	-	-	53.7497	-	-	-	-	53.9995	-	-	-	-	1.00465	-	-
277	/Lon22/	-	-	CY2	-	-	-	-	30	CEM I	42.5	N/R	1	70	0.428571	0.5	-	-	-	-	3	40 × 40 × 160 mm³	20 / W	20 / W	-	-	53.7497	-	-	-	-	45.5818	-	-	-	-	0.848037	-	-
278	/Lon22/	-	-	CY3	-	-	-	-	30	CEM I	42.5	N/R	1	70	0.428571	0.5	-	-	-	-	3	40 × 40 × 160 mm³	20 / W	20 / W	-	-	53.7497	-	-	-	-	47.943	-	-	-	-	0.891967	-	-
279	/Lon22/	-	-	CY4	-	-	-	-	30	CEM I	42.5	N/R	1	70	0.428571	0.5	-	-	-	-	3	40 × 40 × 160 mm³	20 / W	20 / W	-	-	53.7497	-	-	-	-	39.5859	-	-	-	-	0.736486	-	-
280	/Lon22/	-	-	CY5	-	-	-	-	30	CEM I	42.5	N/R	1	70	0.428571	0.5	-	-	-	-	3	40 × 40 × 160 mm³	20 / W	20 / W	-	-	53.7497	-	-	-	-	42.0422	-	-	-	-	0.782184	-	-
281	/Lon22/	-	-	CY6	-	-	-	-	30	CEM I	42.5	N/R	1	70	0.428571	0.5	-	-	-	-	3	40 × 40 × 160 mm³	20 / W	20 / W	-	-	53.7497	-	-	-	-	49.0047	-	-	-	-	0.91172	-	-
282	/Lon22/	-	-	CY7	-	-	-	-	30	CEM I	42.5	N/R	1	70	0.428571	0.5	-	-	-	-	3	40 × 40 × 160 mm³	20 / W	20 / W	-	-	53.7497	-	-	-	-	54.6682	-	-	-	-	1.01709	-	-
283	/Lon22/	-	-	CY8	-	-	-	-	30	CEM I	42.5	N/R	1	70	0.428571	0.5	-	-	-	-	3	40 × 40 × 160 mm³	20 / W	20 / W	-	-	53.7497	-	-	-	-	57.3742	-	-	-	-	1.06743	-	-
284	/Lon22/	-	-	CY9	-	-	-	-	30	CEM I	42.5	N/R	1	70	0.428571	0.5	-	-	-	-	3	40 × 40 × 160 mm³	20 / W	20 / W	-	-	53.7497	-	-	-	-	52.9906	-	-	-	-	0.985877	-	-
285	/Lon22/	-	-	CY10	-	-	-	-	30	CEM I	42.5	N/R	1	70	0.428571	0.5	-	-	-	-	3	40 × 40 × 160 mm³	20 / W	20 / W	-	-	53.7497	-	-	-	-	58.3003	-	-	-	-	1.08466	-	-
286	/ibac/	-	Germany	B8363	-	-	-	-	25	CEM I	42.5	R	1	75	0.333333	0.5	-	-	-	-	3	40 × 40 × 160 mm³	20 / W	20 / W	-	39.4	47.4	-	53.1	-	33	39.8	-	48.9	-	0.837563	0.839662	-	0.920904
287	/ibac/	-	Germany	B8400	-	-	-	-	25	CEM I	42.5	R	1	75	0.333333	0.5	-	-	-	-	3	40 × 40 × 160 mm³	20 / W	20 / W	-	39.4	47.4	-	-	-	38	51.7	-	-	-	0.964467	1.09072	-	-
288	/ibac/	-	Germany	B8457	-	-	-	-	25	CEM I	42.5	R	1	75	0.333333	0.5	-	-	-	-	3	40 × 40 × 160 mm³	20 / W	20 / W	-	37.4	47.2	-	-	-	29.9	42.2	-	-	-	0.799465	0.894068	-	-
289	/ibac/	-	Germany	A-rot	-	-	-	-	-	-	-	-	-	-	-	-	-	-	-	-	-	-	-	-	-	-	-	-	-	-	-	-	-	-	-	-	-	-	-
290	/ibac/	-	Germany	A (0-2)	-	-	-	-	-	-	-	-	-	-	-	-	-	-	-	-	-	-	-	-	-	-	-	-	-	-	-	-	-	-	-	-	-	-	-
291	/ibac/	-	Germany	B-LG	-	-	-	-	25	CEM I	42.5	R	1	75	0.333333	0.5	-	-	-	-	-	-	-	-	-	-	-	-	-	-	-	-	-	-	-	-	-	-	-
292	/ibac/	-	-	B1	-	-	-	-	-	-	-	-	-	-	-	-	-	-	-	-	-	-	-	-	-	-	-	-	-	-	-	-	-	-	-	-	-	-	-
293	/ibac/	-	-	B2	-	-	-	-	-	-	-	-	-	-	-	-	-	-	-	-	-	-	-	-	-	-	-	-	-	-	-	-	-	-	-	-	-	-	-
294	/ibac/	-	-	C1	-	-	-	-	-	-	-	-	-	-	-	-	-	-	-	-	-	-	-	-	-	-	-	-	-	-	-	-	-	-	-	-	-	-	-
295	/ibac/	-	-	C2	-	-	-	-	-	-	-	-	-	-	-	-	-	-	-	-	-	-	-	-	-	-	-	-	-	-	-	-	-	-	-	-	-	-	-
296	/ibac/	-	-	C3	-	-	-	-	-	-	-	-	-	-	-	-	-	-	-	-	-	-	-	-	-	-	-	-	-	-	-	-	-	-	-	-	-	-	-
297	/ibac/	-	-	D1	-	-	-	-	-	-	-	-	-	-	-	-	-	-	-	-	-	-	-	-	-	-	-	-	-	-	-	-	-	-	-	-	-	-	-
298	/ibac/	-	-	D2	-	-	-	-	-	-	-	-	-	-	-	-	-	-	-	-	-	-	-	-	-	-	-	-	-	-	-	-	-	-	-	-	-	-	-
299	/ibac/	kaolinitc clay	-	Mk1	-	-	-	-	-	-	-	-	-	-	-	-	-	-	-	-	-	-	-	-	-	-	-	-	-	-	-	-	-	-	-	-	-	-	-
300	/ibac/	kaolinitc clay	-	Mk2	-	-	-	-	-	-	-	-	-	-	-	-	-	-	-	-	-	-	-	-	-	-	-	-	-	-	-	-	-	-	-	-	-	-	-
301	/ibac/	kaolinitc clay	-	Mk3	-	-	-	-	-	-	-	-	-	-	-	-	-	-	-	-	-	-	-	-	-	-	-	-	-	-	-	-	-	-	-	-	-	-	-
302	/ibac/	kaolinitc clay	-	Mk4	-	-	-	-	-	-	-	-	-	-	-	-	-	-	-	-	-	-	-	-	-	-	-	-	-	-	-	-	-	-	-	-	-	-	-
303	/ibac/	kaolinitc clay	-	Mk5	-	-	-	-	-	-	-	-	-	-	-	-	-	-	-	-	-	-	-	-	-	-	-	-	-	-	-	-	-	-	-	-	-	-	-
304
305
306
307
308
309
310
311
312
313
314
315
316
317
318
319
320
321
322
323
324
325
326
327
328
329
330
331
332
333
334
335
336
337
338
339
340
341
342
343
344
345
346
347
348
349
350
351
352
353
354
355
356
357
358
359
360
361
362
363
364
365
366
367
368
369
370
371
372
373
374
375
376
377
378
379
380
381
382
383
384
385
386
387
388
389
390
391
392
393
394
395
396
397
398
399
400
401
402
403
404
405
406
407
408
409
410
411
412
413
414
415
416
417
418
419
420
421
422
423
424
425
426
427
428
429
430
431
432
433
434
435
436
437
438
439
440
441
442
443
444
445
446
447
448
449
450
451
452
453
454
455
456
457
458
459
460
461
462
463
464
465
466
467
468
469
470
471
472
473
474
475
476
477
478
479
480
481
482
483
484
485
486
487
488
489
490
491
492
493
494
495
496
497
498
499
500
501
502
503
504
505
506
507
508
509
510
511
512
513
514
515
516
517
518
519
520
521
522
523
524
525
526
527
528
529
530
531
532
533
534
535
536
537
538
539
540
541
542
543
544
545
546
547
548
549
550
551
552
553
554
555
556
557
558
559
560
561
562
563
564
565
566
567
568
569
570
571
572
573
574
575
576
577
578
579
580
581
582
583
584
585
586
587
588
589
590
591
592
593
594
595
596
597
598
599
600
601
602
603
604
605
606
607
608
609
610
611
612
613
614
615
616
617
618
619
620
621
622
623
624
625
626
627
628
629
630
631
632
633
634
635
636
637
638
639
640
641
642
643
644
645
646
647
648
649
650
651
652
653
654
655
656
657
658
659
660
661
662
663
664
665
666
667
668
669
670
671
672
673
674
675
676
677
678
679
680
681
682
683
684
685
686
687
688
689
690
691
692
693
694
695
696
697
698
699
700
701
702
703
704
705
706
707
708
709
710
711
712
713
714
715
716
717
718
719
720
721
722
723
724
725
726
727
728
729
730
731
732
733
734
735
736
737
738
739
740
741
742
743
744
745
746
747
748
749
750
751
752
753
754
755
756
757
758
759
760
761
762
763
764
765
766
767
768
769
770
771
772
773
774
775
776
777
778
779
780
781
782
783
784
785
786
787
788
789
790
791
792
793
794
795
796
797
798
799
800
801
802
803
804
805
806
807
808
809
810
811
812
813
814
815
816
817
818
819
820
821
822
823
824
825
826
827
828
829
830
831
832
833
834
835
836
837
838
839
840
841
842
843
844
845
846
847
848
849
850
851
852
853
854
855
856
857
858
859
860
861
862
863
864
865
866
867
868
869
870
871
872
873
874
875
876
877
878
879
880
881
882
883
884
885
886
887
888
889
890
891
892
893
894
895
896
897
898
899
900
901
902
903
904
905
906
907
908
909
910
911
912
913
914
915
916
917
918
919
920
921
922
923
924
925
926
927
928
929
930
931
932
933
934
935
936
937
938
939
940
941
942
943
944
945
946
947
948
949
950
951
952
953
954
955
956
957
958
959
960
961
962
963
964
965
966
967
968
969
970
971
972
973
974
975
976
977
978
979
980
981
982
983
984
985
986
987
988
989
990
991
992
993
994
995
996
997
998
999
1000

## Sheet: chemical composition
sample No.	reference	Calcined Clay							analysis of the raw clay															analysis of the calcined clay															analysis of the cement
		raw material category	origin country	sample name	calcination furnace	max. grainsize before calcination	calcination temperature	calcination duration	LOI	Cl-	SiO2	TiO2	Al2O3	Fe2O3	MnO	MgO	CaO	SO3	P2O5	Na2O	K2O	Na2Oeq	Si/Al	LOI	Cl-	SiO2	TiO2	Al2O3	Fe2O3	MnO	MgO	CaO	SO3	P2O5	Na2O	K2O	Na2Oeq	Si/Al	LOI	GV, Argon	insoluble (HCl/Soda)	insoluble (HCl/KOH)	insoluble (HCl)	insoluble (HNO3)	insoluble (EDTA)	CO2	C	SO3, grav.	S2-
-		-		-	-	mm	°C	h	wt.-%	wt.-%	wt.-%	wt.-%	wt.-%	wt.-%	wt.-%	wt.-%	wt.-%	wt.-%	wt.-%	wt.-%	wt.-%	wt.-%	mol/mol	wt.-%	wt.-%	wt.-%	wt.-%	wt.-%	wt.-%	wt.-%	wt.-%	wt.-%	wt.-%	wt.-%	wt.-%	wt.-%	wt.-%	wt.-%	wt.-%	wt.-%	wt.-%	wt.-%	wt.-%		wt.-%	wt.-%	wt.-%	wt.-%	wt.-%
1	/Beu12/	illitic-kaolinitic clay	Germany	Lias Delta Clay	rotary kiln	< 100	< 950	00:35:00	-	-	-	-	-	-	-	-	-	-	-	-	-	-	-	-	-	55.6	1.2	24.9	7.4	0.1	2.2	4.3	0.4	-	0.07	3.6	2.4388	2.14524	2.8	-	-	-	-	-	-	-	-	-	-
2	/Beu12/	illitic-kaolinitic clay	Germany	Lias Delta Clay	rotary kiln	< 100	< 950	00:35:00	-	-	-	-	-	-	-	-	-	-	-	-	-	-	-	-	-	55.6	1.2	24.9	7.4	0.1	2.2	4.3	0.4	-	0.07	3.6	2.4388	2.14524	8.3	-	-	-	-	-	-	-	-	-	-
3	/Beu12/	illitic-kaolinitic clay	Germany	Lias Delta Clay	rotary kiln	< 100	< 950	00:35:00	-	-	-	-	-	-	-	-	-	-	-	-	-	-	-	-	-	55.6	1.2	24.9	7.4	0.1	2.2	4.3	0.4	-	0.07	3.6	2.4388	2.14524	1.8	-	-	-	-	-	-	-	-	-	-
4	/Dan13/	kaolinitic clay	Portugal	AB1080	muffle kiln	-	700	00:45:00	-	-	-	-	-	-	-	-	-	-	-	-	-	-	-	-	-	61.7	0.4	30.5	3.5	-	0.4	0.1	-	0.1	-	3.3	2.1714	1.9435	1.9	-	-	-	-	-	-	1.32	0.360228	-	-
5	/Dan13/	kaolinitic clay	Portugal	AB1080	muffle kiln	-	725	00:45:00	-	-	-	-	-	-	-	-	-	-	-	-	-	-	-	-	-	61.7	0.4	30.5	3.5	-	0.4	0.1	-	0.1	-	3.3	2.1714	1.9435	1.9	-	-	-	-	-	-	1.32	0.360228	-	-
6	/Dan13/	kaolinitic clay	Portugal	AB1080	muffle kiln	-	750	00:45:00	-	-	-	-	-	-	-	-	-	-	-	-	-	-	-	-	-	61.7	0.4	30.5	3.5	-	0.4	0.1	-	0.1	-	3.3	2.1714	1.9435	1.9	-	-	-	-	-	-	1.32	0.360228	-	-
7	/Dan13/	kaolinitic clay	Portugal	AB1080	muffle kiln	-	775	00:45:00	-	-	-	-	-	-	-	-	-	-	-	-	-	-	-	-	-	61.7	0.4	30.5	3.5	-	0.4	0.1	-	0.1	-	3.3	2.1714	1.9435	1.9	-	-	-	-	-	-	1.32	0.360228	-	-
8	/Dan13/	kaolinitic clay	Portugal	AB1080	muffle kiln	-	800	00:45:00	-	-	-	-	-	-	-	-	-	-	-	-	-	-	-	-	-	61.7	0.4	30.5	3.5	-	0.4	0.1	-	0.1	-	3.3	2.1714	1.9435	1.9	-	-	-	-	-	-	1.32	0.360228	-	-
9	/Dan13/	kaolinitic clay	Portugal	Aldeia e Irmao	muffle kiln	-	700	00:45:00	-	-	-	-	-	-	-	-	-	-	-	-	-	-	-	-	-	64.5	0.4	28.7	3.1	-	0.4	0.1	-	0.1	-	2.6	1.7108	2.15912	1.9	-	-	-	-	-	-	1.32	0.360228	-	-
10	/Dan13/	kaolinitic clay	Portugal	Aldeia e Irmao	muffle kiln	-	725	00:45:00	-	-	-	-	-	-	-	-	-	-	-	-	-	-	-	-	-	64.5	0.4	28.7	3.1	-	0.4	0.1	-	0.1	-	2.6	1.7108	2.15912	1.9	-	-	-	-	-	-	1.32	0.360228	-	-
11	/Dan13/	kaolinitic clay	Portugal	Aldeia e Irmao	muffle kiln	-	750	00:45:00	-	-	-	-	-	-	-	-	-	-	-	-	-	-	-	-	-	64.5	0.4	28.7	3.1	-	0.4	0.1	-	0.1	-	2.6	1.7108	2.15912	1.9	-	-	-	-	-	-	1.32	0.360228	-	-
12	/Dan13/	kaolinitic clay	Portugal	Aldeia e Irmao	muffle kiln	-	775	00:45:00	-	-	-	-	-	-	-	-	-	-	-	-	-	-	-	-	-	64.5	0.4	28.7	3.1	-	0.4	0.1	-	0.1	-	2.6	1.7108	2.15912	1.9	-	-	-	-	-	-	1.32	0.360228	-	-
13	/Dan13/	kaolinitic clay	Portugal	Aldeia e Irmao	muffle kiln	-	800	00:45:00	-	-	-	-	-	-	-	-	-	-	-	-	-	-	-	-	-	64.5	0.4	28.7	3.1	-	0.4	0.1	-	0.1	-	2.6	1.7108	2.15912	1.9	-	-	-	-	-	-	1.32	0.360228	-	-
14	/Dan13/	kaolinitic clay	Portugal	Kal-Sorgila	muffle kiln	-	700	00:45:00	-	-	-	-	-	-	-	-	-	-	-	-	-	-	-	-	-	67.6	0.5	26.2	1.9	-	0.3	0.1	-	0.1	-	3.3	2.1714	2.47882	1.9	-	-	-	-	-	-	1.32	0.360228	-	-
15	/Dan13/	kaolinitic clay	Portugal	Kal-Sorgila	muffle kiln	-	725	00:45:00	-	-	-	-	-	-	-	-	-	-	-	-	-	-	-	-	-	67.6	0.5	26.2	1.9	-	0.3	0.1	-	0.1	-	3.3	2.1714	2.47882	1.9	-	-	-	-	-	-	1.32	0.360228	-	-
16	/Dan13/	kaolinitic clay	Portugal	Kal-Sorgila	muffle kiln	-	750	00:45:00	-	-	-	-	-	-	-	-	-	-	-	-	-	-	-	-	-	67.6	0.5	26.2	1.9	-	0.3	0.1	-	0.1	-	3.3	2.1714	2.47882	1.9	-	-	-	-	-	-	1.32	0.360228	-	-
17	/Dan13/	kaolinitic clay	Portugal	Kal-Sorgila	muffle kiln	-	775	00:45:00	-	-	-	-	-	-	-	-	-	-	-	-	-	-	-	-	-	67.6	0.5	26.2	1.9	-	0.3	0.1	-	0.1	-	3.3	2.1714	2.47882	1.9	-	-	-	-	-	-	1.32	0.360228	-	-
18	/Dan13/	kaolinitic clay	Portugal	Kal-Sorgila	muffle kiln	-	800	00:45:00	-	-	-	-	-	-	-	-	-	-	-	-	-	-	-	-	-	67.6	0.5	26.2	1.9	-	0.3	0.1	-	0.1	-	3.3	2.1714	2.47882	1.9	-	-	-	-	-	-	1.32	0.360228	-	-
19	/Dan13/	kaolinitic clay	Portugal	Argila Sorgia	muffle kiln	-	700	00:45:00	-	-	-	-	-	-	-	-	-	-	-	-	-	-	-	-	-	62.3	1.1	19.8	7	0.1	3.1	3.2	-	0.2	0.1	3.1	2.1398	3.02289	1.9	-	-	-	-	-	-	1.32	0.360228	-	-
20	/Dan13/	kaolinitic clay	Portugal	Argila Sorgia	muffle kiln	-	750	00:45:00	-	-	-	-	-	-	-	-	-	-	-	-	-	-	-	-	-	62.3	1.1	19.8	7	0.1	3.1	3.2	-	0.2	0.1	3.1	2.1398	3.02289	1.9	-	-	-	-	-	-	1.32	0.360228	-	-
21	/Dan13/	kaolinitic clay	Portugal	Argila Sorgia	muffle kiln	-	800	00:45:00	-	-	-	-	-	-	-	-	-	-	-	-	-	-	-	-	-	62.3	1.1	19.8	7	0.1	3.1	3.2	-	0.2	0.1	3.1	2.1398	3.02289	1.9	-	-	-	-	-	-	1.32	0.360228	-	-
22	/Dan13/	illitic clay	Portugal	Argila Rascoia	muffle kiln	-	700	00:45:00	-	-	-	-	-	-	-	-	-	-	-	-	-	-	-	-	-	57	0.9	20.4	10.1	0.1	5.1	1.1	-	0.2	-	5.1	3.3558	2.68438	1.9	-	-	-	-	-	-	1.32	0.360228	-	-
23	/Dan13/	illitic clay	Portugal	Argila Rascoia	muffle kiln	-	750	00:45:00	-	-	-	-	-	-	-	-	-	-	-	-	-	-	-	-	-	57	0.9	20.4	10.1	0.1	5.1	1.1	-	0.2	-	5.1	3.3558	2.68438	1.9	-	-	-	-	-	-	1.32	0.360228	-	-
24	/Dan13/	illitic clay	Portugal	Argila Rascoia	muffle kiln	-	800	00:45:00	-	-	-	-	-	-	-	-	-	-	-	-	-	-	-	-	-	57	0.9	20.4	10.1	0.1	5.1	1.1	-	0.2	-	5.1	3.3558	2.68438	1.9	-	-	-	-	-	-	1.32	0.360228	-	-
25	/Dan13/	smectitic marl	Denmark	Sovind Marl	muffle kiln	-	700	00:45:00	-	-	-	-	-	-	-	-	-	-	-	-	-	-	-	-	-	49.6	1	18.1	10.6	0.2	2.9	14.1	-	0.2	0.7	2.4	2.2792	2.63271	1.9	-	-	-	-	-	-	1.32	0.360228	-	-
26	/Dan13/	smectitic marl	Denmark	Sovind Marl	muffle kiln	-	750	00:45:00	-	-	-	-	-	-	-	-	-	-	-	-	-	-	-	-	-	49.6	1	18.1	10.6	0.2	2.9	14.1	-	0.2	0.7	2.4	2.2792	2.63271	1.9	-	-	-	-	-	-	1.32	0.360228	-	-
27	/Dan13/	smectitic marl	Denmark	Sovind Marl	muffle kiln	-	800	00:45:00	-	-	-	-	-	-	-	-	-	-	-	-	-	-	-	-	-	49.6	1	18.1	10.6	0.2	2.9	14.1	-	0.2	0.7	2.4	2.2792	2.63271	1.9	-	-	-	-	-	-	1.32	0.360228	-	-
28	/Dan13/	smectitic marl	Denmark	Sovind Marl	muffle kiln	-	850	00:45:00	-	-	-	-	-	-	-	-	-	-	-	-	-	-	-	-	-	49.6	1	18.1	10.6	0.2	2.9	14.1	-	0.2	0.7	2.4	2.2792	2.63271	1.9	-	-	-	-	-	-	1.32	0.360228	-	-
29	/Dan13/	smectitic marl	Denmark	Sovind Marl	muffle kiln	-	900	00:45:00	-	-	-	-	-	-	-	-	-	-	-	-	-	-	-	-	-	49.6	1	18.1	10.6	0.2	2.9	14.1	-	0.2	0.7	2.4	2.2792	2.63271	1.9	-	-	-	-	-	-	1.32	0.360228	-	-
30	/Dan13/	smectitic marl	Denmark	Sovind Marl	muffle kiln	-	950	00:45:00	-	-	-	-	-	-	-	-	-	-	-	-	-	-	-	-	-	49.6	1	18.1	10.6	0.2	2.9	14.1	-	0.2	0.7	2.4	2.2792	2.63271	1.9	-	-	-	-	-	-	1.32	0.360228	-	-
31	/Dan13/	smectitic marl	Denmark	Sovind Marl	muffle kiln	-	1000	00:45:00	-	-	-	-	-	-	-	-	-	-	-	-	-	-	-	-	-	49.6	1	18.1	10.6	0.2	2.9	14.1	-	0.2	0.7	2.4	2.2792	2.63271	1.9	-	-	-	-	-	-	1.32	0.360228	-	-
32	/Dan13/	smectitic marl	Denmark	Sovind Marl	industrial rotary kiln	-	750	-	-	-	-	-	-	-	-	-	-	-	-	-	-	-	-	-	-	49.6	1	18.1	10.6	0.2	2.9	14.1	-	0.2	0.7	2.4	2.2792	2.63271	1.9	-	-	-	-	-	-	1.32	0.360228	-	-
33	/Dan13/	smectitic marl	Denmark	Sovind Marl	industrial rotary kiln	-	800	-	-	-	-	-	-	-	-	-	-	-	-	-	-	-	-	-	-	49.6	1	18.1	10.6	0.2	2.9	14.1	-	0.2	0.7	2.4	2.2792	2.63271	1.9	-	-	-	-	-	-	1.32	0.360228	-	-
34	/Dan13/	smectitic marl	Denmark	Sovind Marl	industrial rotary kiln	-	850	-	-	-	-	-	-	-	-	-	-	-	-	-	-	-	-	-	-	49.6	1	18.1	10.6	0.2	2.9	14.1	-	0.2	0.7	2.4	2.2792	2.63271	1.9	-	-	-	-	-	-	1.32	0.360228	-	-
35	/Dan13/	smectitic marl	Denmark	Sovind Marl	industrial rotary kiln	-	900	-	-	-	-	-	-	-	-	-	-	-	-	-	-	-	-	-	-	49.6	1	18.1	10.6	0.2	2.9	14.1	-	0.2	0.7	2.4	2.2792	2.63271	1.9	-	-	-	-	-	-	1.32	0.360228	-	-
36	/Dan13/	smectitic marl	Denmark	Sovind Marl	industrial rotary kiln	-	950	-	-	-	-	-	-	-	-	-	-	-	-	-	-	-	-	-	-	49.6	1	18.1	10.6	0.2	2.9	14.1	-	0.2	0.7	2.4	2.2792	2.63271	1.9	-	-	-	-	-	-	1.32	0.360228	-	-
37	/Dan13/	smectitic marl	Denmark	Sovind Marl H2	muffle kiln	-	600	00:45:00	-	-	-	-	-	-	-	-	-	-	-	-	-	-	-	-	-	48.32	0.97	16.8	10.16	0.11	2.71	15.33	-	0.21	0.63	2.51	2.28158	2.76323	1.9	-	-	-	-	-	-	1.32	0.360228	-	-
38	/Dan13/	smectitic marl	Denmark	Sovind Marl H2	muffle kiln	-	650	00:45:00	-	-	-	-	-	-	-	-	-	-	-	-	-	-	-	-	-	48.32	0.97	16.8	10.16	0.11	2.71	15.33	-	0.21	0.63	2.51	2.28158	2.76323	1.9	-	-	-	-	-	-	1.32	0.360228	-	-
39	/Dan13/	smectitic marl	Denmark	Sovind Marl H2	muffle kiln	-	700	00:45:00	-	-	-	-	-	-	-	-	-	-	-	-	-	-	-	-	-	48.32	0.97	16.8	10.16	0.11	2.71	15.33	-	0.21	0.63	2.51	2.28158	2.76323	1.9	-	-	-	-	-	-	1.32	0.360228	-	-
40	/Dan13/	smectitic marl	Denmark	Sovind Marl H2	muffle kiln	-	750	00:45:00	-	-	-	-	-	-	-	-	-	-	-	-	-	-	-	-	-	48.32	0.97	16.8	10.16	0.11	2.71	15.33	-	0.21	0.63	2.51	2.28158	2.76323	1.9	-	-	-	-	-	-	1.32	0.360228	-	-
41	/Dan13/	smectitic marl	Denmark	Sovind Marl H2	muffle kiln	-	800	00:45:00	-	-	-	-	-	-	-	-	-	-	-	-	-	-	-	-	-	48.32	0.97	16.8	10.16	0.11	2.71	15.33	-	0.21	0.63	2.51	2.28158	2.76323	1.9	-	-	-	-	-	-	1.32	0.360228	-	-
42	/Dan13/	smectitic marl	Denmark	Sovind Marl H2	muffle kiln	-	850	00:45:00	-	-	-	-	-	-	-	-	-	-	-	-	-	-	-	-	-	48.32	0.97	16.8	10.16	0.11	2.71	15.33	-	0.21	0.63	2.51	2.28158	2.76323	1.9	-	-	-	-	-	-	1.32	0.360228	-	-
43	/Dan13/	smectitic marl	Denmark	Sovind Marl H3	muffle kiln	-	600	00:45:00	-	-	-	-	-	-	-	-	-	-	-	-	-	-	-	-	-	49.19	1.09	18.36	10.39	0.18	2.8	12.78	-	0.23	0.68	2.42	2.27236	2.57397	1.9	-	-	-	-	-	-	1.32	0.360228	-	-
44	/Dan13/	smectitic marl	Denmark	Sovind Marl H3	muffle kiln	-	650	00:45:00	-	-	-	-	-	-	-	-	-	-	-	-	-	-	-	-	-	49.19	1.09	18.36	10.39	0.18	2.8	12.78	-	0.23	0.68	2.42	2.27236	2.57397	1.9	-	-	-	-	-	-	1.32	0.360228	-	-
45	/Dan13/	smectitic marl	Denmark	Sovind Marl H3	muffle kiln	-	700	00:45:00	-	-	-	-	-	-	-	-	-	-	-	-	-	-	-	-	-	49.19	1.09	18.36	10.39	0.18	2.8	12.78	-	0.23	0.68	2.42	2.27236	2.57397	1.9	-	-	-	-	-	-	1.32	0.360228	-	-
46	/Dan13/	smectitic marl	Denmark	Sovind Marl H3	muffle kiln	-	750	00:45:00	-	-	-	-	-	-	-	-	-	-	-	-	-	-	-	-	-	49.19	1.09	18.36	10.39	0.18	2.8	12.78	-	0.23	0.68	2.42	2.27236	2.57397	1.9	-	-	-	-	-	-	1.32	0.360228	-	-
47	/Dan13/	smectitic marl	Denmark	Sovind Marl H3	muffle kiln	-	800	00:45:00	-	-	-	-	-	-	-	-	-	-	-	-	-	-	-	-	-	49.19	1.09	18.36	10.39	0.18	2.8	12.78	-	0.23	0.68	2.42	2.27236	2.57397	1.9	-	-	-	-	-	-	1.32	0.360228	-	-
48	/Dan13/	smectitic marl	Denmark	Sovind Marl H3	muffle kiln	-	850	00:45:00	-	-	-	-	-	-	-	-	-	-	-	-	-	-	-	-	-	49.19	1.09	18.36	10.39	0.18	2.8	12.78	-	0.23	0.68	2.42	2.27236	2.57397	1.9	-	-	-	-	-	-	1.32	0.360228	-	-
49	/Dan13/	smectitic marl	Denmark	Sovind Marl H4	muffle kiln	-	600	00:45:00	-	-	-	-	-	-	-	-	-	-	-	-	-	-	-	-	-	48.67	1.08	18.13	10.71	0.34	2.82	13.34	-	0.23	0.72	2.29	2.22682	2.57907	1.9	-	-	-	-	-	-	1.32	0.360228	-	-
50	/Dan13/	smectitic marl	Denmark	Sovind Marl H4	muffle kiln	-	650	00:45:00	-	-	-	-	-	-	-	-	-	-	-	-	-	-	-	-	-	48.67	1.08	18.13	10.71	0.34	2.82	13.34	-	0.23	0.72	2.29	2.22682	2.57907	1.9	-	-	-	-	-	-	1.32	0.360228	-	-
51	/Dan13/	smectitic marl	Denmark	Sovind Marl H4	muffle kiln	-	700	00:45:00	-	-	-	-	-	-	-	-	-	-	-	-	-	-	-	-	-	48.67	1.08	18.13	10.71	0.34	2.82	13.34	-	0.23	0.72	2.29	2.22682	2.57907	1.9	-	-	-	-	-	-	1.32	0.360228	-	-
52	/Dan13/	smectitic marl	Denmark	Sovind Marl H4	muffle kiln	-	750	00:45:00	-	-	-	-	-	-	-	-	-	-	-	-	-	-	-	-	-	48.67	1.08	18.13	10.71	0.34	2.82	13.34	-	0.23	0.72	2.29	2.22682	2.57907	1.9	-	-	-	-	-	-	1.32	0.360228	-	-
53	/Dan13/	smectitic marl	Denmark	Sovind Marl H4	muffle kiln	-	800	00:45:00	-	-	-	-	-	-	-	-	-	-	-	-	-	-	-	-	-	48.67	1.08	18.13	10.71	0.34	2.82	13.34	-	0.23	0.72	2.29	2.22682	2.57907	1.9	-	-	-	-	-	-	1.32	0.360228	-	-
54	/Dan13/	smectitic marl	Denmark	Sovind Marl H4	muffle kiln	-	850	00:45:00	-	-	-	-	-	-	-	-	-	-	-	-	-	-	-	-	-	48.67	1.08	18.13	10.71	0.34	2.82	13.34	-	0.23	0.72	2.29	2.22682	2.57907	1.9	-	-	-	-	-	-	1.32	0.360228	-	-
55	/Dan13/	illitic clay	Poland	Gniew	muffle kiln	-	700	00:45:00	-	-	-	-	-	-	-	-	-	-	-	-	-	-	-	-	-	58.3	0.8	15.9	8.1	0.1	3.2	9.3	-	0.2	0.2	4	2.832	3.52266	1.9	-	-	-	-	-	-	1.32	0.360228	-	-
56	/Dan13/	illitic clay	Poland	Gniew	muffle kiln	-	725	00:45:00	-	-	-	-	-	-	-	-	-	-	-	-	-	-	-	-	-	58.3	0.8	15.9	8.1	0.1	3.2	9.3	-	0.2	0.2	4	2.832	3.52266	1.9	-	-	-	-	-	-	1.32	0.360228	-	-
57	/Dan13/	illitic clay	Poland	Gniew	muffle kiln	-	750	00:45:00	-	-	-	-	-	-	-	-	-	-	-	-	-	-	-	-	-	58.3	0.8	15.9	8.1	0.1	3.2	9.3	-	0.2	0.2	4	2.832	3.52266	1.9	-	-	-	-	-	-	1.32	0.360228	-	-
58	/Dan13/	illitic clay	Poland	Gniew	muffle kiln	-	775	00:45:00	-	-	-	-	-	-	-	-	-	-	-	-	-	-	-	-	-	58.3	0.8	15.9	8.1	0.1	3.2	9.3	-	0.2	0.2	4	2.832	3.52266	1.9	-	-	-	-	-	-	1.32	0.360228	-	-
59	/Dan13/	illitic clay	Poland	Gniew	muffle kiln	-	800	00:45:00	-	-	-	-	-	-	-	-	-	-	-	-	-	-	-	-	-	58.3	0.8	15.9	8.1	0.1	3.2	9.3	-	0.2	0.2	4	2.832	3.52266	1.9	-	-	-	-	-	-	1.32	0.360228	-	-
60	/Tol07/	calcined-clay brick	Brazil	GCWCCB	-	-	850	-	-	-	-	-	-	-	-	-	-	-	-	-	-	-	-	-	-	63.89	-	25.49	7.73	-	0.04	0.29	-	-	Traces	0.95	0.6251	2.40803	-	-	1.5					-	-	-	-
61	/Tol07/	calcined-clay brick	Brazil	GCWCCB	-	-	850	-	-	-	-	-	-	-	-	-	-	-	-	-	-	-	-	-	-	63.89	-	25.49	7.73	-	0.04	0.29	-	-	Traces	0.95	0.6251	2.40803	-	-	1.5					-	-	-	-
62	/Tol07/	calcined-clay brick	Brazil	GCWCCB	-	-	850	-	-	-	-	-	-	-	-	-	-	-	-	-	-	-	-	-	-	63.89	-	25.49	7.73	-	0.04	0.29	-	-	Traces	0.95	0.6251	2.40803	-	-	1.5					-	-	-	-
63	/Tol07/	calcined-clay brick	Brazil	GCWCCB	-	-	850	-	-	-	-	-	-	-	-	-	-	-	-	-	-	-	-	-	-	63.89	-	25.49	7.73	-	0.04	0.29	-	-	Traces	0.95	0.6251	2.40803	-	-	1.5					-	-	-	-
64	/Tol07/	calcined-clay brick	Brazil	GCWCCB	-	-	850	-	-	-	-	-	-	-	-	-	-	-	-	-	-	-	-	-	-	63.89	-	25.49	7.73	-	0.04	0.29	-	-	Traces	0.95	0.6251	2.40803	-	-	1.5					-	-	-	-
65	/Tol07/	calcined-clay brick	Brazil	GCWCCB	-	-	850	-	-	-	-	-	-	-	-	-	-	-	-	-	-	-	-	-	-	63.89	-	25.49	7.73	-	0.04	0.29	-	-	Traces	0.95	0.6251	2.40803	-	-	1.5					-	-	-	-
66	/Tol07/	calcined-clay brick	Brazil	GCWCCB	-	-	850	-	-	-	-	-	-	-	-	-	-	-	-	-	-	-	-	-	-	63.89	-	25.49	7.73	-	0.04	0.29	-	-	Traces	0.95	0.6251	2.40803	-	-	1.5					-	-	-	-
67	/Tol07/	calcined-clay brick	Brazil	GCWCCB	-	-	850	-	-	-	-	-	-	-	-	-	-	-	-	-	-	-	-	-	-	63.89	-	25.49	7.73	-	0.04	0.29	-	-	Traces	0.95	0.6251	2.40803	-	-	1.5					-	-	-	-
68	/Beu15/	kaolinitc clay	Germany	LCT	muffle furnace	-	720	00:60	-	-	52	1	21	8	-	2	3	1	-	0.4	3	2.374	2.37894	-	-	-	-	-	-	-	-	-	-	-	-	-	-	-	-	-	-	-	-	-	-	-	-	-	-
69	/Beu15/	kaolinitc clay	Germany	GCT	rotary kiln	-	750	-	-	-	52	1	21	8	-	2	3	1	-	0.4	3	2.374	2.37894	-	-	-	-	-	-	-	-	-	-	-	-	-	-	-	-	-	-	-	-	-	-	-	-	-	-
70	/Beu15/	kaolinitc clay	Germany	LCT	muffle furnace	-	600	00:60	-	-	52	1	21	8	-	2	3	1	-	0.4	3	2.374	2.37894	-	-	-	-	-	-	-	-	-	-	-	-	-	-	-	-	-	-	-	-	-	-	-	-	-	-
71	/Beu15/	kaolinitc clay	Germany	GCT	rotary kiln	-	600	-	-	-	52	1	21	8	-	2	3	1	-	0.4	3	2.374	2.37894	-	-	-	-	-	-	-	-	-	-	-	-	-	-	-	-	-	-	-	-	-	-	-	-	-	-
72	/Beu15/	kaolinitc clay	Germany	LCT	muffle furnace	-	770	00:60	-	-	52	1	21	8	-	2	3	1	-	0.4	3	2.374	2.37894	-	-	-	-	-	-	-	-	-	-	-	-	-	-	-	-	-	-	-	-	-	-	-	-	-	-
73	/Beu15/	kaolinitc clay	Germany	GCT	rotary kiln	-	800	-	-	-	52	1	21	8	-	2	3	1	-	0.4	3	2.374	2.37894	-	-	-	-	-	-	-	-	-	-	-	-	-	-	-	-	-	-	-	-	-	-	-	-	-	-
74	/Beu15/	kaolinitc clay	Germany	LCT	muffle furnace	-	820	00:60	-	-	52	1	21	8	-	2	3	1	-	0.4	3	2.374	2.37894	-	-	-	-	-	-	-	-	-	-	-	-	-	-	-	-	-	-	-	-	-	-	-	-	-	-
75	/Beu15/	kaolinitc clay	Germany	GCT	rotary kiln	-	850	-	-	-	52	1	21	8	-	2	3	1	-	0.4	3	2.374	2.37894	-	-	-	-	-	-	-	-	-	-	-	-	-	-	-	-	-	-	-	-	-	-	-	-	-	-
76	/Beu15/	kaolinitc clay	Germany	LCT	muffle furnace	-	1000	00:60	-	-	52	1	21	8	-	2	3	1	-	0.4	3	2.374	2.37894	-	-	-	-	-	-	-	-	-	-	-	-	-	-	-	-	-	-	-	-	-	-	-	-	-	-
77	/Beu15/	kaolinitc clay	Germany	GCT	rotary kiln	-	1000	-	-	-	52	1	21	8	-	2	3	1	-	0.4	3	2.374	2.37894	-	-	-	-	-	-	-	-	-	-	-	-	-	-	-	-	-	-	-	-	-	-	-	-	-	-
78	/Trü19/	kaolinitc clay	-	K_700_D	pilot rotary kiln	-	700	00:10:00	11.1	-	51.4	0.3	33.2	0.5	-	0.1	0.1	-	-	0.2	3.1	2.2398	1.48739	-	-	-	-	-	-	-	-	-	-	-	-	-	-	-	-	-	-	-	-	-	-	-	-	-	-
79	/Trü19/	kaolinitc clay	-	K_700_D	pilot rotary kiln	-	700	00:10:00	11.1	-	51.4	0.3	33.2	0.5	-	0.1	0.1	-	-	0.2	3.1	2.2398	1.48739	-	-	-	-	-	-	-	-	-	-	-	-	-	-	-	-	-	-	-	-	-	-	-	-	-	-
80	/Trü19/	Illitic clay	-	I_900_D	pilot rotary kiln	-	900	00:10:00	4.7	-	63.9	0.7	15.1	5.8	-	2.5	1.7	-	-	1.6	4.2	4.3636	4.06559	-	-	-	-	-	-	-	-	-	-	-	-	-	-	-	-	-	-	-	-	-	-	-	-	-	-
81	/Trü19/	Illitic clay	-	I_900_D	pilot rotary kiln	-	900	00:10:00	4.7	-	63.9	0.7	15.1	5.8	-	2.5	1.7	-	-	1.6	4.2	4.3636	4.06559	-	-	-	-	-	-	-	-	-	-	-	-	-	-	-	-	-	-	-	-	-	-	-	-	-	-
82	/Trü19/	smectitic clay	-	M_900_D	pilot rotary kiln	-	900	00:10:00	10.8	-	53.9	0.3	16.7	5.8	-	3.5	6.1	-	-	0.4	2.4	1.9792	3.10079	-	-	-	-	-	-	-	-	-	-	-	-	-	-	-	-	-	-	-	-	-	-	-	-	-	-
83	/Trü19/	smectitic clay	-	M_900_D	pilot rotary kiln	-	900	00:10:00	10.8	-	53.9	0.3	16.7	5.8	-	3.5	6.1	-	-	0.4	2.4	1.9792	3.10079	-	-	-	-	-	-	-	-	-	-	-	-	-	-	-	-	-	-	-	-	-	-	-	-	-	-
84	/He95/	Illitic clay	USA	Illite	muffle furnace	-	650	01:40:00	5.33	-	52.99	0.78	22.6	5.01	-	2.49	0.89	-	0.08	0.11	8.03	5.39374	2.25261	-	-	-	-	-	-	-	-	-	-	-	-	-	-	-	0.8	-	-	-	-	-	-	-	-	-	-
85	/He95/	Illitic clay	USA	Illite	muffle furnace	-	790	01:40:00	5.33	-	52.99	0.78	22.6	5.01	-	2.49	0.89	-	0.08	0.11	8.03	5.39374	2.25261	-	-	-	-	-	-	-	-	-	-	-	-	-	-	-	0.8	-	-	-	-	-	-	-	-	-	-
86	/He95/	Illitic clay	USA	Illite	muffle furnace	-	930	01:40:00	5.33	-	52.99	0.78	22.6	5.01	-	2.49	0.89	-	0.08	0.11	8.03	5.39374	2.25261	-	-	-	-	-	-	-	-	-	-	-	-	-	-	-	0.8	-	-	-	-	-	-	-	-	-	-
87	/He94/	kaolin	Denmark?	kaolin	muffle furnace	-	550	01:40:00	12.11	-	46.1	0.05	35.3	1.01	-	0.27	0.06	-	0.12	0.06	1.62	1.12596	1.25466	-	-	-	-	-	-	-	-	-	-	-	-	-	-	-	0.8	-	-	-	-	-	-	-	-	-	-
88	/He94/	kaolin	Denmark?	kaolin	muffle furnace	-	650	01:40:00	12.11	-	46.1	0.05	35.3	1.01	-	0.27	0.06	-	0.12	0.06	1.62	1.12596	1.25466	-	-	-	-	-	-	-	-	-	-	-	-	-	-	-	0.8	-	-	-	-	-	-	-	-	-	-
89	/He94/	kaolin	Denmark?	kaolin	muffle furnace	-	800	01:40:00	12.11	-	46.1	0.05	35.3	1.01	-	0.27	0.06	-	0.12	0.06	1.62	1.12596	1.25466	-	-	-	-	-	-	-	-	-	-	-	-	-	-	-	0.8	-	-	-	-	-	-	-	-	-	-
90	/He94/	kaolin	Denmark?	kaolin	muffle furnace	-	950	01:40:00	12.11	-	46.1	0.05	35.3	1.01	-	0.27	0.06	-	0.12	0.06	1.62	1.12596	1.25466	-	-	-	-	-	-	-	-	-	-	-	-	-	-	-	0.8	-	-	-	-	-	-	-	-	-	-
91	/Bal21/	kaolinitic-illitic clay	Russian Federation	Nikitsky	-	-	200	1900-01-08	-	-	53.19	1.52	15.78	17.28	-	1.26	1.6	1.2	0.25	0.34	6.17	4.39986	3.23834	-	-	-	-	-	-	-	-	-	-	-	-	-	-	-	-	-	-	-	-	-	-	-	-	-	-
92	/Bal21/	kaolinitic-illitic clay	Russian Federation	Nikitsky	-	-	400	02:00:00	-	-	53.19	1.52	15.78	17.28	-	1.26	1.6	1.2	0.25	0.34	6.17	4.39986	3.23834	-	-	-	-	-	-	-	-	-	-	-	-	-	-	-	-	-	-	-	-	-	-	-	-	-	-
93	/Bal21/	kaolinitic-illitic clay	Russian Federation	Nikitsky	-	-	600	02:00:00	-	-	53.19	1.52	15.78	17.28	-	1.26	1.6	1.2	0.25	0.34	6.17	4.39986	3.23834	-	-	-	-	-	-	-	-	-	-	-	-	-	-	-	-	-	-	-	-	-	-	-	-	-	-
94	/Bal21/	kaolinitic-illitic clay	Russian Federation	Nikitsky	-	-	700	02:00:00	-	-	53.19	1.52	15.78	17.28	-	1.26	1.6	1.2	0.25	0.34	6.17	4.39986	3.23834	-	-	-	-	-	-	-	-	-	-	-	-	-	-	-	-	-	-	-	-	-	-	-	-	-	-
95	/Bal21/	kaolinitic-illitic clay	Russian Federation	Nikitsky	-	-	800	02:00:00	-	-	53.19	1.52	15.78	17.28	-	1.26	1.6	1.2	0.25	0.34	6.17	4.39986	3.23834	-	-	-	-	-	-	-	-	-	-	-	-	-	-	-	-	-	-	-	-	-	-	-	-	-	-
96	/Bal21/	kaolinitic-illitic clay	Russian Federation	Nikitsky	-	-	900	02:00:00	-	-	53.19	1.52	15.78	17.28	-	1.26	1.6	1.2	0.25	0.34	6.17	4.39986	3.23834	-	-	-	-	-	-	-	-	-	-	-	-	-	-	-	-	-	-	-	-	-	-	-	-	-	-
97	/Bal21/	illitic-kaolinitic clay	Russian Federation	Staroshaigovsky	-	-	200	02:00:00	-	-	66.12	0.64	13.72	10.9	-	1.12	1.68	-	0.26	0.55	4.32	3.39256	4.62997	-	-	-	-	-	-	-	-	-	-	-	-	-	-	-	-	-	-	-	-	-	-	-	-	-	-
98	/Bal21/	illitic-kaolinitic clay	Russian Federation	Staroshaigovsky	-	-	400	02:00:00	-	-	66.12	0.64	13.72	10.9	-	1.12	1.68	-	0.26	0.55	4.32	3.39256	4.62997	-	-	-	-	-	-	-	-	-	-	-	-	-	-	-	-	-	-	-	-	-	-	-	-	-	-
99	/Bal21/	illitic-kaolinitic clay	Russian Federation	Staroshaigovsky	-	-	600	02:00:00	-	-	66.12	0.64	13.72	10.9	-	1.12	1.68	-	0.26	0.55	4.32	3.39256	4.62997	-	-	-	-	-	-	-	-	-	-	-	-	-	-	-	-	-	-	-	-	-	-	-	-	-	-
100	/Bal21/	illitic-kaolinitic clay	Russian Federation	Staroshaigovsky	-	-	700	02:00:00	-	-	66.12	0.64	13.72	10.9	-	1.12	1.68	-	0.26	0.55	4.32	3.39256	4.62997	-	-	-	-	-	-	-	-	-	-	-	-	-	-	-	-	-	-	-	-	-	-	-	-	-	-
101	/Bal21/	illitic-kaolinitic clay	Russian Federation	Staroshaigovsky	-	-	800	02:00:00	-	-	66.12	0.64	13.72	10.9	-	1.12	1.68	-	0.26	0.55	4.32	3.39256	4.62997	-	-	-	-	-	-	-	-	-	-	-	-	-	-	-	-	-	-	-	-	-	-	-	-	-	-
102	/Bal21/	illitic-kaolinitic clay	Russian Federation	Staroshaigovsky	-	-	900	02:00:00	-	-	66.12	0.64	13.72	10.9	-	1.12	1.68	-	0.26	0.55	4.32	3.39256	4.62997	-	-	-	-	-	-	-	-	-	-	-	-	-	-	-	-	-	-	-	-	-	-	-	-	-	-
103	/Dan19/	kaolinitic clay	-	Clay A	pilot scale rotary kiln	-	800	00:45:00	-	-	-	-	-	-	-	-	-	-	-	-	-	-	-	1.8	-	60.6	0.4	30	3.4	-	0.4	0.1	-	0.1	-	3.2	2.1056	1.94067	2.4	-	-	-	-	-	-	-	-	-	-
104	/Dan19/	kaolinitic clay	-	Clay A	pilot scale rotary kiln	-	800	00:45:00	-	-	-	-	-	-	-	-	-	-	-	-	-	-	-	1.8	-	60.6	0.4	30	3.4	-	0.4	0.1	-	0.1	-	3.2	2.1056	1.94067	2.4	-	-	-	-	-	-	-	-	-	-
105	/Dan19/	kaolinitic clay	-	Clay A	pilot scale rotary kiln	-	800	00:45:00	-	-	-	-	-	-	-	-	-	-	-	-	-	-	-	1.8	-	60.6	0.4	30	3.4	-	0.4	0.1	-	0.1	-	3.2	2.1056	1.94067	2.4	-	-	-	-	-	-	-	-	-	-
106	/Dan19/	smectitic marl	-	Clay B	pilot scale rotary kiln	-	800	00:45:00	-	-	-	-	-	-	-	-	-	-	-	-	-	-	-	2	-	48.7	1	17.8	10.4	0.2	2.8	13.8	-	0.2	0.7	2.4	2.2792	2.6285	2.4	-	-	-	-	-	-	-	-	-	-
107	/Dan19/	smectitic marl	-	Clay B	pilot scale rotary kiln	-	800	00:45:00	-	-	-	-	-	-	-	-	-	-	-	-	-	-	-	2	-	48.7	1	17.8	10.4	0.2	2.8	13.8	-	0.2	0.7	2.4	2.2792	2.6285	2.4	-	-	-	-	-	-	-	-	-	-
108	/Dan19/	smectitic marl	-	Clay B	pilot scale rotary kiln	-	800	00:45:00	-	-	-	-	-	-	-	-	-	-	-	-	-	-	-	2	-	48.7	1	17.8	10.4	0.2	2.8	13.8	-	0.2	0.7	2.4	2.2792	2.6285	2.4	-	-	-	-	-	-	-	-	-	-
109	/Dan18/	kaolinitic clay	-	Clay A	pilot scale rotary kiln	-	700	00:45:00	-	-	-	-	-	-	-	-	-	-	-	-	-	-	-	1.8	-	60.6	0.4	30	3.4	-	0.4	0.1	-	0.1	-	3.2	2.1056	1.94067	2.4	-	-	-	-	-	-	-	-	-	-
110	/Dan18/	kaolinitic clay	-	Clay A	pilot scale rotary kiln	-	725	00:45:00	-	-	-	-	-	-	-	-	-	-	-	-	-	-	-	1.8	-	60.6	0.4	30	3.4	-	0.4	0.1	-	0.1	-	3.2	2.1056	1.94067	2.4	-	-	-	-	-	-	-	-	-	-
111	/Dan18/	kaolinitic clay	-	Clay A	pilot scale rotary kiln	-	750	00:45:00	-	-	-	-	-	-	-	-	-	-	-	-	-	-	-	1.8	-	60.6	0.4	30	3.4	-	0.4	0.1	-	0.1	-	3.2	2.1056	1.94067	2.4	-	-	-	-	-	-	-	-	-	-
112	/Dan18/	kaolinitic clay	-	Clay A	pilot scale rotary kiln	-	775	00:45:00	-	-	-	-	-	-	-	-	-	-	-	-	-	-	-	1.8	-	60.6	0.4	30	3.4	-	0.4	0.1	-	0.1	-	3.2	2.1056	1.94067	2.4	-	-	-	-	-	-	-	-	-	-
113	/Dan18/	kaolinitic clay	-	Clay A	pilot scale rotary kiln	-	800	00:45:00	-	-	-	-	-	-	-	-	-	-	-	-	-	-	-	1.8	-	60.6	0.4	30	3.4	-	0.4	0.1	-	0.1	-	3.2	2.1056	1.94067	2.4	-	-	-	-	-	-	-	-	-	-
114	/Dan18/	smectitic marl	-	Clay B	pilot scale rotary kiln	-	700	00:45:00	-	-	-	-	-	-	-	-	-	-	-	-	-	-	-	2	-	48.7	1	17.8	10.4	0.2	2.8	13.8	-	0.2	0.7	2.4	2.2792	2.6285	2.4	-	-	-	-	-	-	-	-	-	-
115	/Dan18/	smectitic marl	-	Clay B	pilot scale rotary kiln	-	750	00:45:00	-	-	-	-	-	-	-	-	-	-	-	-	-	-	-	2	-	48.7	1	17.8	10.4	0.2	2.8	13.8	-	0.2	0.7	2.4	2.2792	2.6285	2.4	-	-	-	-	-	-	-	-	-	-
116	/Dan18/	smectitic marl	-	Clay B	pilot scale rotary kiln	-	800	00:45:00	-	-	-	-	-	-	-	-	-	-	-	-	-	-	-	2	-	48.7	1	17.8	10.4	0.2	2.8	13.8	-	0.2	0.7	2.4	2.2792	2.6285	2.4	-	-	-	-	-	-	-	-	-	-
117	/Dan18/	smectitic marl	-	Clay B	pilot scale rotary kiln	-	850	00:45:00	-	-	-	-	-	-	-	-	-	-	-	-	-	-	-	2	-	48.7	1	17.8	10.4	0.2	2.8	13.8	-	0.2	0.7	2.4	2.2792	2.6285	2.4	-	-	-	-	-	-	-	-	-	-
118	/Dan18/	smectitic marl	-	Clay B	pilot scale rotary kiln	-	900	00:45:00	-	-	-	-	-	-	-	-	-	-	-	-	-	-	-	2	-	48.7	1	17.8	10.4	0.2	2.8	13.8	-	0.2	0.7	2.4	2.2792	2.6285	2.4	-	-	-	-	-	-	-	-	-	-
119	/Dan18/	smectitic marl	-	Clay B	pilot scale rotary kiln	-	950	00:45:00	-	-	-	-	-	-	-	-	-	-	-	-	-	-	-	2	-	48.7	1	17.8	10.4	0.2	2.8	13.8	-	0.2	0.7	2.4	2.2792	2.6285	2.4	-	-	-	-	-	-	-	-	-	-
120	/Dan18/	smectitic marl	-	Clay B	pilot scale rotary kiln	-	1000	00:45:00	-	-	-	-	-	-	-	-	-	-	-	-	-	-	-	2	-	48.7	1	17.8	10.4	0.2	2.8	13.8	-	0.2	0.7	2.4	2.2792	2.6285	2.4	-	-	-	-	-	-	-	-	-	-
121	/Mer20/	illitic shale	-	MI1	-	-	950	-	-	-	-	-	-	-	-	-	-	-	-	-	-	-	-	0.85	-	66.3	0.76	16.28	9.23	0.01	1.46	0.33	<0,01	0.09	0.08	5.6	3.7648	3.91254	1.9	-	-	-	-	-	-	-	-	-	-
122	/Mer20/	illitic shale	-	MI1	-	-	950	-	-	-	-	-	-	-	-	-	-	-	-	-	-	-	-	0.85	-	66.3	0.76	16.28	9.23	0.01	1.46	0.33	<0,01	0.09	0.08	5.6	3.7648	3.91254	1.9	-	-	-	-	-	-	-	-	-	-
123	/Mer20/	illitic shale	-	MI1	-	-	950	-	-	-	-	-	-	-	-	-	-	-	-	-	-	-	-	0.85	-	66.3	0.76	16.28	9.23	0.01	1.46	0.33	<0,01	0.09	0.08	5.6	3.7648	3.91254	1.9	-	-	-	-	-	-	-	-	-	-
124	/Mer20/	illitic shale	-	MI2	-	-	950	-	-	-	-	-	-	-	-	-	-	-	-	-	-	-	-	0.81	-	62.61	0.89	18.28	7.79	0.08	2.73	0.77	0.07	0.13	1.61	4.25	4.4065	3.29054	-	-	-	-	-	-	-	-	-	-	-
125	/Mer20/	illitic shale	-	MI2	-	-	950	-	-	-	-	-	-	-	-	-	-	-	-	-	-	-	-	0.81	-	62.61	0.89	18.28	7.79	0.08	2.73	0.77	0.07	0.13	1.61	4.25	4.4065	3.29054	-	-	-	-	-	-	-	-	-	-	-
126	/Mer20/	illitic shale	-	MI2	-	-	950	-	-	-	-	-	-	-	-	-	-	-	-	-	-	-	-	0.81	-	62.61	0.89	18.28	7.79	0.08	2.73	0.77	0.07	0.13	1.61	4.25	4.4065	3.29054	-	-	-	-	-	-	-	-	-	-	-
127	/Jaf20/	smectitic-kaolinitic clay	-	CC	-	-	750	03:00:00	7.9	-	64.32	0.76	18.21	7.38	-	0.25	0.03	0.01	0.1	0.08	0.84	0.63	3.39341	1.09	-	68.49	0.83	19.82	8.18	-	0.24	0.04	0.2	0.12	0.1	0.96	0.73168	3.31989	1.69	-	-	-	-	-	-	-	-	-	-
128	/Msi20/	illitic clay	Germany	I1	laboratory-scale rotary	-	850	-	5.89	-	76.74	1.43	10.4	1.79	0.01	0.5	0.36	0.25	0.19	0.32	1.8	1.5044	7.08905	-	-	-	-	-	-	-	-	-	-	-	-	-	-	-	3.57	-	-	-	-	-	-	-	-	-	-
129	/Msi20/	illitic clay	Germany	I1	laboratory-scale rotary	-	900	-	5.89	-	76.74	1.43	10.4	1.79	0.01	0.5	0.36	0.25	0.19	0.32	1.8	1.5044	7.08905	-	-	-	-	-	-	-	-	-	-	-	-	-	-	-	3.57	-	-	-	-	-	-	-	-	-	-
130	/Msi20/	illitic clay	Germany	I2	laboratory-scale rotary	-	850	-	5.7	-	68.06	1.34	12.5	5.66	0.06	1.32	0.84	0.08	0.37	0.93	2.76	2.74608	5.23096	-	-	-	-	-	-	-	-	-	-	-	-	-	-	-	3.57	-	-	-	-	-	-	-	-	-	-
131	/Msi20/	illitic clay	Germany	I2	laboratory-scale rotary	-	900	-	5.7	-	68.06	1.34	12.5	5.66	0.06	1.32	0.84	0.08	0.37	0.93	2.76	2.74608	5.23096	-	-	-	-	-	-	-	-	-	-	-	-	-	-	-	3.57	-	-	-	-	-	-	-	-	-	-
132	/Msi20/	kaolinitic clay	Germany	K1	laboratory-scale rotary	-	650	-	10.81	-	54.6	2.79	24.27	2.44	0.01	0.54	1.51	0.68	0.3	0.26	1.31	1.12198	2.16134	-	-	-	-	-	-	-	-	-	-	-	-	-	-	-	3.57	-	-	-	-	-	-	-	-	-	-
133	/Msi20/	kaolinitic clay	Germany	K1	laboratory-scale rotary	-	900	-	10.81	-	54.6	2.79	24.27	2.44	0.01	0.54	1.51	0.68	0.3	0.26	1.31	1.12198	2.16134	-	-	-	-	-	-	-	-	-	-	-	-	-	-	-	3.57	-	-	-	-	-	-	-	-	-	-
134	/Msi20/	illitic-kaolinitic clay	Germany	B1	laboratory-scale rotary	-	650	-	8.35	-	65.67	2.11	17.335	2.115	0.01	0.52	0.935	0.465	0.245	0.29	1.555	1.31319	3.63951	-	-	-	-	-	-	-	-	-	-	-	-	-	-	-	3.57	-	-	-	-	-	-	-	-	-	-
135	/Msi20/	illitic-kaolinitic clay	Germany	B1	laboratory-scale rotary	-	900	-	8.35	-	65.67	2.11	17.335	2.115	0.01	0.52	0.935	0.465	0.245	0.29	1.555	1.31319	3.63951	-	-	-	-	-	-	-	-	-	-	-	-	-	-	-	3.57	-	-	-	-	-	-	-	-	-	-
136	/Dan20/	smectitic clay	Germany?	Sm	pilot scale rotary kiln	-	800	00:45:00	-	-	-	-	-	-	-	-	-	-	-	-	-	-	-	1.7	-	61.4	1.1	19.5	6.9	-	3	3.2	-	-	0.1	3.1	2.1398	3.02506	-	-	-	-	-	-	-	-	-	-	-
137	/Dan20/	smectitic clay	Germany?	Sm-Ca	pilot scale rotary kiln	-	800	00:45:00	-	-	-	-	-	-	-	-	-	-	-	-	-	-	-	2.4	-	48.7	1	17.8	10.4	-	2.8	13.8	-	-	0.7	2.4	2.2792	2.6285	-	-	-	-	-	-	-	-	-	-	-
138	/Dan20/	illitic clay	Germany?	Ill	pilot scale rotary kiln	-	800	00:45:00	-	-	-	-	-	-	-	-	-	-	-	-	-	-	-	1.1	-	56.1	0.9	20.1	9.9	-	5	1.1	-	-	-	5	3.29	2.68143	-	-	-	-	-	-	-	-	-	-	-
139	/Dan20/	illitic clay	Germany?	Ill-Ca	pilot scale rotary kiln	-	800	00:45:00	-	-	-	-	-	-	-	-	-	-	-	-	-	-	-	1.7	-	57.4	0.8	15.7	8	-	3.1	9.2	-	-	0.2	3.9	2.7662	3.51246	-	-	-	-	-	-	-	-	-	-	-
140	/Ira19a/	illitic shale	Argentina	LUT	laboratory furnace	-	900	-	3.7	-	61.1	0.8	17.8	7.5	0.1	2.6	0.6	0.1	0.1	1.5	4.1	4.1978	3.29777	3.1	-	20.1	-	3.6	3.9	-	0.8	64.2	2.8	-	0.1	1.1	0.8238	5.36406	-	-	-	-	-	-	-	-	-	-	-
141	/Ira19a/	illitic shale	Argentina	LUT	laboratory furnace	-	1000	-	3.7	-	61.1	0.8	17.8	7.5	0.1	2.6	0.6	0.1	0.1	1.5	4.1	4.1978	3.29777	3.1	-	20.1	-	3.6	3.9	-	0.8	64.2	2.8	-	0.1	1.1	0.8238	5.36406	-	-	-	-	-	-	-	-	-	-	-
142	/Ira19a/	illitic shale	Argentina	LUT	laboratory furnace	-	1100	-	3.7	-	61.1	0.8	17.8	7.5	0.1	2.6	0.6	0.1	0.1	1.5	4.1	4.1978	3.29777	3.1	-	20.1	-	3.6	3.9	-	0.8	64.2	2.8	-	0.1	1.1	0.8238	5.36406	-	-	-	-	-	-	-	-	-	-	-
143	/Ira19a/	illitic shale	Argentina	HET	laboratory furnace	-	900	-	4.5	-	60.3	0.9	16.9	7.4	0.1	2.5	1.2	0.03	0.1	1.5	4.1	4.1978	3.42792	3.1	-	20.1	-	3.6	3.9	-	0.8	64.2	2.8	-	0.1	1.1	0.8238	5.36406	-	-	-	-	-	-	-	-	-	-	-
144	/Ira19a/	illitic shale	Argentina	HET	laboratory furnace	-	1000	-	4.5	-	60.3	0.9	16.9	7.4	0.1	2.5	1.2	0.03	0.1	1.5	4.1	4.1978	3.42792	3.1	-	20.1	-	3.6	3.9	-	0.8	64.2	2.8	-	0.1	1.1	0.8238	5.36406	-	-	-	-	-	-	-	-	-	-	-
145	/Ira19a/	illitic shale	Argentina	HET	laboratory furnace	-	1100	-	4.5	-	60.3	0.9	16.9	7.4	0.1	2.5	1.2	0.03	0.1	1.5	4.1	4.1978	3.42792	3.1	-	20.1	-	3.6	3.9	-	0.8	64.2	2.8	-	0.1	1.1	0.8238	5.36406	-	-	-	-	-	-	-	-	-	-	-
146	/Ira19b/	illitic shale	Argentina	IC01	laboratory furnace	-	950	-	3.76	-	62.43	0.91	17.4	6.79	0.06	2.34	0.78	< 0.01	0.1	1.79	3.98	4.40884	3.44702	-	-	-	-	-	-	-	-	-	-	-	-	-	-	-	-	-	-	-	-	-	-	-	-	-	-
147	/Ira19b/	illitic shale	Argentina	IC02	laboratory furnace	-	950	-	3.54	-	63.9	0.8	15.78	7.01	0.09	2.42	0.9	0.05	0.12	1.67	3.28	3.82824	3.89039	-	-	-	-	-	-	-	-	-	-	-	-	-	-	-	-	-	-	-	-	-	-	-	-	-	-
148	/Ira19b/	illitic shale	Argentina	IC03	laboratory furnace	-	950	-	4.22	-	65.2	0.73	15.25	6.93	0.05	2.15	1.26	0.02	0.15	0.95	3.47	3.23326	4.1075	-	-	-	-	-	-	-	-	-	-	-	-	-	-	-	-	-	-	-	-	-	-	-	-	-	-
149	/Ira19b/	illitic shale	Argentina	IC04	laboratory furnace	-	950	-	4.38	-	67.4	0.77	15.9	5.34	0.22	1.18	0.44	0.08	0.1	0.07	3.87	2.61646	4.07251	-	-	-	-	-	-	-	-	-	-	-	-	-	-	-	-	-	-	-	-	-	-	-	-	-	-
150	/Ira19b/	illitic shale	Argentina	IC05	laboratory furnace	-	950	-	3.91	-	64.5	1.05	17.55	6.16	0.01	1.3	0.29	0.01	0.05	0.1	5.43	3.67294	3.53087	-	-	-	-	-	-	-	-	-	-	-	-	-	-	-	-	-	-	-	-	-	-	-	-	-	-
151	/Ira19b/	illitic shale	Argentina	IC06	laboratory furnace	-	950	-	3.58	-	64.2	0.77	16.3	7.72	0.01	1.42	0.54	0.01	0.09	0.12	5.43	3.69294	3.78397	-	-	-	-	-	-	-	-	-	-	-	-	-	-	-	-	-	-	-	-	-	-	-	-	-	-
152	/Ira19b/	kaolinitic shale	Argentina	KC01	laboratory furnace	-	600	-	4.95	-	76.2	2.23	14.6	0.5	<0.01	0.18	0.17	0.01	0.08	0.06	0.5	0.389	5.0142	-	-	-	-	-	-	-	-	-	-	-	-	-	-	-	-	-	-	-	-	-	-	-	-	-	-
153	/Ira19b/	kaolinitic shale	Argentina	KC02	laboratory furnace	-	600	-	12.03	-	38.1	2.31	28.6	18.21	0.02	0.35	0.18	0.01	0.1	0.05	0.82	0.58956	1.27985	-	-	-	-	-	-	-	-	-	-	-	-	-	-	-	-	-	-	-	-	-	-	-	-	-	-
154	/Moh16/	illitic marl	Algeria	CM 500°C-5h	laboratory furnace	-	500	05:00	22.98	0.63	34.68	-	9.16	3.44	-	4.66	22.52	0.94	-	-	1.1	0.7238	3.63734	-	-	-	-	-	-	-	-	-	-	-	-	-	-	-	-	-	-	-	-	-	-	-	-	-	-
155	/Moh16/	illitic marl	Algeria	CM 600°C-2h	laboratory furnace	-	600	02:00	22.98	0.63	34.68	-	9.16	3.44	-	4.66	22.52	0.94	-	-	1.1	0.7238	3.63734	-	-	-	-	-	-	-	-	-	-	-	-	-	-	-	-	-	-	-	-	-	-	-	-	-	-
156	/Moh16/	illitic marl	Algeria	CM 600°C-3h	laboratory furnace	-	600	03:00	22.98	0.63	34.68	-	9.16	3.44	-	4.66	22.52	0.94	-	-	1.1	0.7238	3.63734	-	-	-	-	-	-	-	-	-	-	-	-	-	-	-	-	-	-	-	-	-	-	-	-	-	-
157	/Moh16/	illitic marl	Algeria	CM 600°C-5h	laboratory furnace	-	600	05:00	22.98	0.63	34.68	-	9.16	3.44	-	4.66	22.52	0.94	-	-	1.1	0.7238	3.63734	-	-	-	-	-	-	-	-	-	-	-	-	-	-	-	-	-	-	-	-	-	-	-	-	-	-
158	/Moh16/	illitic marl	Algeria	CM 700°C-2h	laboratory furnace	-	700	02:00	22.98	0.63	34.68	-	9.16	3.44	-	4.66	22.52	0.94	-	-	1.1	0.7238	3.63734	-	-	-	-	-	-	-	-	-	-	-	-	-	-	-	-	-	-	-	-	-	-	-	-	-	-
159	/Moh16/	illitic marl	Algeria	CM 700°C-3h	laboratory furnace	-	700	03:00	22.98	0.63	34.68	-	9.16	3.44	-	4.66	22.52	0.94	-	-	1.1	0.7238	3.63734	-	-	-	-	-	-	-	-	-	-	-	-	-	-	-	-	-	-	-	-	-	-	-	-	-	-
160	/Moh16/	illitic marl	Algeria	CM 700°C-5h	laboratory furnace	-	700	05:00	22.98	0.63	34.68	-	9.16	3.44	-	4.66	22.52	0.94	-	-	1.1	0.7238	3.63734	-	-	-	-	-	-	-	-	-	-	-	-	-	-	-	-	-	-	-	-	-	-	-	-	-	-
161	/Moh16/	illitic marl	Algeria	CM 800°C-2h	laboratory furnace	-	800	02:00	22.98	0.63	34.68	-	9.16	3.44	-	4.66	22.52	0.94	-	-	1.1	0.7238	3.63734	-	-	-	-	-	-	-	-	-	-	-	-	-	-	-	-	-	-	-	-	-	-	-	-	-	-
162	/Moh16/	illitic marl	Algeria	CM 800°C-3h	laboratory furnace	-	800	03:00	22.98	0.63	34.68	-	9.16	3.44	-	4.66	22.52	0.94	-	-	1.1	0.7238	3.63734	-	-	-	-	-	-	-	-	-	-	-	-	-	-	-	-	-	-	-	-	-	-	-	-	-	-
163	/Moh16/	illitic marl	Algeria	CM 800°C-5h	laboratory furnace	-	800	05:00	22.98	0.63	34.68	-	9.16	3.44	-	4.66	22.52	0.94	-	-	1.1	0.7238	3.63734	-	-	-	-	-	-	-	-	-	-	-	-	-	-	-	-	-	-	-	-	-	-	-	-	-	-
164	/Moh16/	illitic marl	Algeria	CM 1000°C-2h	laboratory furnace	-	1000	02:00	22.98	0.63	34.68	-	9.16	3.44	-	4.66	22.52	0.94	-	-	1.1	0.7238	3.63734	-	-	-	-	-	-	-	-	-	-	-	-	-	-	-	-	-	-	-	-	-	-	-	-	-	-
165	/Tay15/	kaolin	USA	K	laboratory furnace	-	650	01:00	14.22	-	46.24	0.33	37.9	0.51	0	0.12	0.14	0.06	0.17	0.01	0.24	0.16792	1.17214	-	-	-	-	-	-	-	-	-	-	-	-	-	-	-	3.07	-	-	-	-	-	-	-	-	-	-
166	/Tay15/	kaolinite-calcium bentonite	USA	KCaB	laboratory furnace	-	930	01:00	5.38	-	62.21	0.21	20.07	3.93	0.03	2.51	1.49	1.25	0.05	2.2	0.61	2.60138	2.97792	-	-	-	-	-	-	-	-	-	-	-	-	-	-	-	3.07	-	-	-	-	-	-	-	-	-	-
167	/Tay15/	kaolinite-sodium bentonite	USA	KNaB	laboratory furnace	-	830	01:00	9.87	-	54.39	0.26	28.88	2.44	0.03	1.28	0.83	0.3	0.12	1.13	0.44	1.41952	1.80935	-	-	-	-	-	-	-	-	-	-	-	-	-	-	-	3.07	-	-	-	-	-	-	-	-	-	-
168	/Tir14/	kaolinitic clay	Argentina	MK1	laboratory furnace	< 4 mm	700	-	13.3	-	45.9	0.99	37	0.77	-	0.12	0.08	-	-	0.06	0.4	0.3232	1.19182	-	-	-	-	-	-	-	-	-	-	-	-	-	-	-	-	-	-	-	-	-	-	-	-	-	-
169	/Tir14/	kaolinitic clay	Argentina	MK2	laboratory furnace	< 4 mm	700	-	12.15	-	51.4	1.42	31.3	0.92	-	0.19	0.4	-	-	0.36	0.38	0.61004	1.57768	-	-	-	-	-	-	-	-	-	-	-	-	-	-	-	-	-	-	-	-	-	-	-	-	-	-
170	/Tir14/	kaolinitic clay	Argentina	MK3	laboratory furnace	< 4 mm	700	-	9.65	-	59.4	0.26	27.1	0.76	-	0.12	0.15	-	-	0.14	0.41	0.40978	2.1058	-	-	-	-	-	-	-	-	-	-	-	-	-	-	-	-	-	-	-	-	-	-	-	-	-	-
171	/Tir14/	kaolinitic clay	Argentina	MK4	laboratory furnace	< 4 mm	700	-	7.77	-	65.7	0.43	21.1	0.85	-	0.22	0.26	-	-	0.07	0.68	0.51744	2.99146	-	-	-	-	-	-	-	-	-	-	-	-	-	-	-	-	-	-	-	-	-	-	-	-	-	-
172	/Tir14/	kaolinitic-illitic clay	Argentina	MK5	laboratory furnace	< 4 mm	700	-	3.44	-	74.8	0.18	14.8	1.1	-	0.26	0.3	-	-	0.92	3.71	3.36118	4.85556	-	-	-	-	-	-	-	-	-	-	-	-	-	-	-	-	-	-	-	-	-	-	-	-	-	-
173	/Aka15/	kaolinitic clay	Lybia	Sebha (A)	-	6.35-12.7 mm	800	02:00	14.25	-	-	-	-	-	-	-	-	-	-	-	-	-	-	-	-	82.75	0.52	10.65	0.89	0.03	0.2	< 0.004	0.03	0.15	0.25	0.53	0.59874	7.4648	-	-	-	-	-	-	-	-	-	-	-
174	/Aka15/	kaolinitic clay	Lybia	Sebha (A)	-	6.35-12.7 mm	800	02:00	14.25	-	-	-	-	-	-	-	-	-	-	-	-	-	-	-	-	82.75	0.52	10.65	0.89	0.03	0.2	< 0.004	0.03	0.15	0.25	0.53	0.59874	7.4648	-	-	-	-	-	-	-	-	-	-	-
175	/Aka15/	kaolinitic clay	Lybia	Sebha (A)	-	6.35-12.7 mm	800	02:00	14.25	-	-	-	-	-	-	-	-	-	-	-	-	-	-	-	-	82.75	0.52	10.65	0.89	0.03	0.2	< 0.004	0.03	0.15	0.25	0.53	0.59874	7.4648	-	-	-	-	-	-	-	-	-	-	-
176	/Aka15/	kaolinitic clay	Lybia	Temenhint (B)	-	6.35-12.7 mm	800	02:00	8.02	-	-	-	-	-	-	-	-	-	-	-	-	-	-	-	-	67.39	1.43	22.16	0.99	0.02	0.14	< 0.004	0.02	0.04	0.01	0.34	0.23372	2.92163	-	-	-	-	-	-	-	-	-	-	-
177	/Aka15/	kaolinitic clay	Lybia	Temenhint (B)	-	6.35-12.7 mm	800	02:00	8.02	-	-	-	-	-	-	-	-	-	-	-	-	-	-	-	-	67.39	1.43	22.16	0.99	0.02	0.14	< 0.004	0.02	0.04	0.01	0.34	0.23372	2.92163	-	-	-	-	-	-	-	-	-	-	-
178	/Aka15/	kaolinitic clay	Lybia	Temenhint (B)	-	6.35-12.7 mm	800	02:00	8.02	-	-	-	-	-	-	-	-	-	-	-	-	-	-	-	-	67.39	1.43	22.16	0.99	0.02	0.14	< 0.004	0.02	0.04	0.01	0.34	0.23372	2.92163	-	-	-	-	-	-	-	-	-	-	-
179	/Aka15/	kaolinitic clay	Lybia	Alafya (′C)	-	6.35-12.7 mm	800	02:00	9.66	-	-	-	-	-	-	-	-	-	-	-	-	-	-	-	-	56.73	1.05	20.73	8.9	0.05	0.55	0.01	0.09	0.16	0.09	2.76	1.90608	2.62914	-	-	-	-	-	-	-	-	-	-	-
180	/Aka15/	kaolinitic clay	Lybia	Alafya (′C)	-	6.35-12.7 mm	800	02:00	9.66	-	-	-	-	-	-	-	-	-	-	-	-	-	-	-	-	56.73	1.05	20.73	8.9	0.05	0.55	0.01	0.09	0.16	0.09	2.76	1.90608	2.62914	-	-	-	-	-	-	-	-	-	-	-
181	/Aka15/	kaolinitic clay	Lybia	Alafya (′C)	-	6.35-12.7 mm	800	02:00	9.66	-	-	-	-	-	-	-	-	-	-	-	-	-	-	-	-	56.73	1.05	20.73	8.9	0.05	0.55	0.01	0.09	0.16	0.09	2.76	1.90608	2.62914	-	-	-	-	-	-	-	-	-	-	-
182	/Aka15/	kaolinitic clay	Lybia	Agar (D)	-	6.35-12.7 mm	800	02:00	12.23	-	-	-	-	-	-	-	-	-	-	-	-	-	-	-	-	53.41	1.25	30.07	2.1	0.02	0.2	0.05	0.04	0.12	< 0.009	1.35	0.8883	1.70643	-	-	-	-	-	-	-	-	-	-	-
183	/Aka15/	kaolinitic clay	Lybia	Agar (D)	-	6.35-12.7 mm	800	02:00	12.23	-	-	-	-	-	-	-	-	-	-	-	-	-	-	-	-	53.41	1.25	30.07	2.1	0.02	0.2	0.05	0.04	0.12	< 0.009	1.35	0.8883	1.70643	-	-	-	-	-	-	-	-	-	-	-
184	/Aka15/	kaolinitic clay	Lybia	Agar (D)	-	6.35-12.7 mm	800	02:00	12.23	-	-	-	-	-	-	-	-	-	-	-	-	-	-	-	-	53.41	1.25	30.07	2.1	0.02	0.2	0.05	0.04	0.12	< 0.009	1.35	0.8883	1.70643	-	-	-	-	-	-	-	-	-	-	-
185	/Aka15/	kaolinitic clay	Lybia	Tarout (E)	-	6.35-12.7 mm	800	02:00	5.78	-	-	-	-	-	-	-	-	-	-	-	-	-	-	-	-	54.52	1.3	24.89	2.5	0.03	0.29	0.58	0.51	0.5	0.83	1.14	1.58012	2.10441	-	-	-	-	-	-	-	-	-	-	-
186	/Aka15/	kaolinitic clay	Lybia	Tarout (E)	-	6.35-12.7 mm	800	02:00	5.78	-	-	-	-	-	-	-	-	-	-	-	-	-	-	-	-	54.52	1.3	24.89	2.5	0.03	0.29	0.58	0.51	0.5	0.83	1.14	1.58012	2.10441	-	-	-	-	-	-	-	-	-	-	-
187	/Aka15/	kaolinitic clay	Lybia	Tarout (E)	-	6.35-12.7 mm	800	02:00	5.78	-	-	-	-	-	-	-	-	-	-	-	-	-	-	-	-	54.52	1.3	24.89	2.5	0.03	0.29	0.58	0.51	0.5	0.83	1.14	1.58012	2.10441	-	-	-	-	-	-	-	-	-	-	-
188	/Tre18/	kaolinitic clay	Argentina	PK1	-	-	600	-	-	-	-	-	-	-	-	-	-	-	-	-	-	-	-	-	-	-	-	-	-	-	-	-	-	-	-	-	-	-	-	-	-	-	-	-	-	-	-	-	-
189	/Tre18/	kaolinitic clay	Argentina	PK2	-	-	600	-	-	-	-	-	-	-	-	-	-	-	-	-	-	-	-	-	-	-	-	-	-	-	-	-	-	-	-	-	-	-	-	-	-	-	-	-	-	-	-	-	-
190	/Hue18/	illitic-kaolinitic	-	PL1	pilot scale rotary kiln	-	600	-	-	-	75.93	-	17.54	2.47	-	0.97	0.19	-	-	0.27	2.6	1.9808	4.15895	-	-	-	-	-	-	-	-	-	-	-	-	-	-	-	-	-	-	-	-	-	-	-	-	-	-
191	/Hue18/	illitic-kaolinitic	-	PL1	pilot scale rotary kiln	-	650	-	-	-	75.93	-	17.54	2.47	-	0.97	0.19	-	-	0.27	2.6	1.9808	4.15895	-	-	-	-	-	-	-	-	-	-	-	-	-	-	-	-	-	-	-	-	-	-	-	-	-	-
192	/Hue18/	illitic-kaolinitic	-	PL1	pilot scale rotary kiln	-	700	-	-	-	75.93	-	17.54	2.47	-	0.97	0.19	-	-	0.27	2.6	1.9808	4.15895	-	-	-	-	-	-	-	-	-	-	-	-	-	-	-	-	-	-	-	-	-	-	-	-	-	-
193	/Hue18/	kaolinitic-illitic clay	-	PL2	pilot scale rotary kiln	-	600	-	-	-	74.17	-	20.83	2.7	-	0.49	0.61	-	-	0.15	1.46	1.11068	3.42089	-	-	-	-	-	-	-	-	-	-	-	-	-	-	-	-	-	-	-	-	-	-	-	-	-	-
194	/Hue18/	kaolinitic-illitic clay	-	PL2	pilot scale rotary kiln	-	650	-	-	-	74.17	-	20.83	2.7	-	0.49	0.61	-	-	0.15	1.46	1.11068	3.42089	-	-	-	-	-	-	-	-	-	-	-	-	-	-	-	-	-	-	-	-	-	-	-	-	-	-
195	/Hue18/	kaolinitic-illitic clay	-	PL2	pilot scale rotary kiln	-	700	-	-	-	74.17	-	20.83	2.7	-	0.49	0.61	-	-	0.15	1.46	1.11068	3.42089	-	-	-	-	-	-	-	-	-	-	-	-	-	-	-	-	-	-	-	-	-	-	-	-	-	-
196	/Hue18/	kaolinitic clay	-	PL7	pilot scale rotary kiln	-	600	-	-	-	70.95	-	27.19	1.12	-	0.06	0.19	-	-	0.11	0.38	0.36004	2.50693	-	-	-	-	-	-	-	-	-	-	-	-	-	-	-	-	-	-	-	-	-	-	-	-	-	-
197	/Hue18/	kaolinitic clay	-	PL7	pilot scale rotary kiln	-	650	-	-	-	70.95	-	27.19	1.12	-	0.06	0.19	-	-	0.11	0.38	0.36004	2.50693	-	-	-	-	-	-	-	-	-	-	-	-	-	-	-	-	-	-	-	-	-	-	-	-	-	-
198	/Hue18/	kaolinitic clay	-	PL7	pilot scale rotary kiln	-	700	-	-	-	70.95	-	27.19	1.12	-	0.06	0.19	-	-	0.11	0.38	0.36004	2.50693	-	-	-	-	-	-	-	-	-	-	-	-	-	-	-	-	-	-	-	-	-	-	-	-	-	-
199	/Hue18/	kaolinitic-illitic clay	-	PL1_80_PL7_20	pilot scale rotary kiln	-	600	-	-	-	74.934	-	19.47	2.2	-	0.788	0.19	-	-	0.238	2.156	1.65665	3.69754	-	-	-	-	-	-	-	-	-	-	-	-	-	-	-	-	-	-	-	-	-	-	-	-	-	-
200	/Hue18/	kaolinitic-illitic clay	-	PL1_80_PL7_20	pilot scale rotary kiln	-	650	-	-	-	74.934	-	19.47	2.2	-	0.788	0.19	-	-	0.238	2.156	1.65665	3.69754	-	-	-	-	-	-	-	-	-	-	-	-	-	-	-	-	-	-	-	-	-	-	-	-	-	-
201	/Hue18/	kaolinitic-illitic clay	-	PL1_80_PL7_20	pilot scale rotary kiln	-	700	-	-	-	74.934	-	19.47	2.2	-	0.788	0.19	-	-	0.238	2.156	1.65665	3.69754	-	-	-	-	-	-	-	-	-	-	-	-	-	-	-	-	-	-	-	-	-	-	-	-	-	-
202	/Hue18/	kaolinitic-illitic clay	-	PL1_60_PL7_40	pilot scale rotary kiln	-	600	-	-	-	73.938	-	21.4	1.93	-	0.606	0.19	-	-	0.206	1.712	1.3325	3.31935	-	-	-	-	-	-	-	-	-	-	-	-	-	-	-	-	-	-	-	-	-	-	-	-	-	-
203	/Hue18/	kaolinitic-illitic clay	-	PL1_60_PL7_40	pilot scale rotary kiln	-	650	-	-	-	73.938	-	21.4	1.93	-	0.606	0.19	-	-	0.206	1.712	1.3325	3.31935	-	-	-	-	-	-	-	-	-	-	-	-	-	-	-	-	-	-	-	-	-	-	-	-	-	-
204	/Hue18/	kaolinitic-illitic clay	-	PL1_60_PL7_40	pilot scale rotary kiln	-	700	-	-	-	73.938	-	21.4	1.93	-	0.606	0.19	-	-	0.206	1.712	1.3325	3.31935	-	-	-	-	-	-	-	-	-	-	-	-	-	-	-	-	-	-	-	-	-	-	-	-	-	-
205	/Hue18/	kaolinitic-illitic clay	-	PL1_40_PL7_60	pilot scale rotary kiln	-	600	-	-	-	72.942	-	23.33	1.66	-	0.424	0.19	-	-	0.174	1.268	1.00834	3.00374	-	-	-	-	-	-	-	-	-	-	-	-	-	-	-	-	-	-	-	-	-	-	-	-	-	-
206	/Hue18/	kaolinitic-illitic clay	-	PL1_40_PL7_60	pilot scale rotary kiln	-	650	-	-	-	72.942	-	23.33	1.66	-	0.424	0.19	-	-	0.174	1.268	1.00834	3.00374	-	-	-	-	-	-	-	-	-	-	-	-	-	-	-	-	-	-	-	-	-	-	-	-	-	-
207	/Hue18/	kaolinitic-illitic clay	-	PL1_40_PL7_60	pilot scale rotary kiln	-	700	-	-	-	72.942	-	23.33	1.66	-	0.424	0.19	-	-	0.174	1.268	1.00834	3.00374	-	-	-	-	-	-	-	-	-	-	-	-	-	-	-	-	-	-	-	-	-	-	-	-	-	-
208	/Hue18/	kaolinitic-illitic clay	-	PL1_20_PL7_80	pilot scale rotary kiln	-	600	-	-	-	71.946	-	25.26	1.39	-	0.242	0.19	-	-	0.142	0.824	0.684192	2.73636	-	-	-	-	-	-	-	-	-	-	-	-	-	-	-	-	-	-	-	-	-	-	-	-	-	-
209	/Hue18/	kaolinitic-illitic clay	-	PL1_20_PL7_80	pilot scale rotary kiln	-	650	-	-	-	71.946	-	25.26	1.39	-	0.242	0.19	-	-	0.142	0.824	0.684192	2.73636	-	-	-	-	-	-	-	-	-	-	-	-	-	-	-	-	-	-	-	-	-	-	-	-	-	-
210	/Hue18/	kaolinitic-illitic clay	-	PL1_20_PL7_80	pilot scale rotary kiln	-	700	-	-	-	71.946	-	25.26	1.39	-	0.242	0.19	-	-	0.142	0.824	0.684192	2.73636	-	-	-	-	-	-	-	-	-	-	-	-	-	-	-	-	-	-	-	-	-	-	-	-	-	-
211	/Hue18/	kaolinitic-illitic clay	-	PL2_80_PL7_20	pilot scale rotary kiln	-	600	-	-	-	73.526	-	22.102	2.384	-	0.404	0.526	-	-	0.142	1.244	0.960552	3.19602	-	-	-	-	-	-	-	-	-	-	-	-	-	-	-	-	-	-	-	-	-	-	-	-	-	-
212	/Hue18/	kaolinitic-illitic clay	-	PL2_80_PL7_20	pilot scale rotary kiln	-	650	-	-	-	73.526	-	22.102	2.384	-	0.404	0.526	-	-	0.142	1.244	0.960552	3.19602	-	-	-	-	-	-	-	-	-	-	-	-	-	-	-	-	-	-	-	-	-	-	-	-	-	-
213	/Hue18/	kaolinitic-illitic clay	-	PL2_80_PL7_20	pilot scale rotary kiln	-	700	-	-	-	73.526	-	22.102	2.384	-	0.404	0.526	-	-	0.142	1.244	0.960552	3.19602	-	-	-	-	-	-	-	-	-	-	-	-	-	-	-	-	-	-	-	-	-	-	-	-	-	-
214	/Hue18/	kaolinitic-illitic clay	-	PL2_60_PL7_40	pilot scale rotary kiln	-	600	-	-	-	72.882	-	23.374	2.068	-	0.318	0.442	-	-	0.134	1.028	0.810424	2.99562	-	-	-	-	-	-	-	-	-	-	-	-	-	-	-	-	-	-	-	-	-	-	-	-	-	-
215	/Hue18/	kaolinitic-illitic clay	-	PL2_60_PL7_40	pilot scale rotary kiln	-	650	-	-	-	72.882	-	23.374	2.068	-	0.318	0.442	-	-	0.134	1.028	0.810424	2.99562	-	-	-	-	-	-	-	-	-	-	-	-	-	-	-	-	-	-	-	-	-	-	-	-	-	-
216	/Hue18/	kaolinitic-illitic clay	-	PL2_60_PL7_40	pilot scale rotary kiln	-	700	-	-	-	72.882	-	23.374	2.068	-	0.318	0.442	-	-	0.134	1.028	0.810424	2.99562	-	-	-	-	-	-	-	-	-	-	-	-	-	-	-	-	-	-	-	-	-	-	-	-	-	-
217	/Hue18/	kaolinitic-illitic clay	-	PL2_40_PL7_60	pilot scale rotary kiln	-	600	-	-	-	72.238	-	24.646	1.752	-	0.232	0.358	-	-	0.126	0.812	0.660296	2.81591	-	-	-	-	-	-	-	-	-	-	-	-	-	-	-	-	-	-	-	-	-	-	-	-	-	-
218	/Hue18/	kaolinitic-illitic clay	-	PL2_40_PL7_60	pilot scale rotary kiln	-	650	-	-	-	72.238	-	24.646	1.752	-	0.232	0.358	-	-	0.126	0.812	0.660296	2.81591	-	-	-	-	-	-	-	-	-	-	-	-	-	-	-	-	-	-	-	-	-	-	-	-	-	-
219	/Hue18/	kaolinitic-illitic clay	-	PL2_40_PL7_60	pilot scale rotary kiln	-	700	-	-	-	72.238	-	24.646	1.752	-	0.232	0.358	-	-	0.126	0.812	0.660296	2.81591	-	-	-	-	-	-	-	-	-	-	-	-	-	-	-	-	-	-	-	-	-	-	-	-	-	-
220	/Hue18/	kaolinitic-illitic clay	-	PL2_20_PL7_80	pilot scale rotary kiln	-	600	-	-	-	71.594	-	25.918	1.436	-	0.146	0.274	-	-	0.118	0.596	0.510168	2.65384	-	-	-	-	-	-	-	-	-	-	-	-	-	-	-	-	-	-	-	-	-	-	-	-	-	-
221	/Hue18/	kaolinitic-illitic clay	-	PL2_20_PL7_80	pilot scale rotary kiln	-	650	-	-	-	71.594	-	25.918	1.436	-	0.146	0.274	-	-	0.118	0.596	0.510168	2.65384	-	-	-	-	-	-	-	-	-	-	-	-	-	-	-	-	-	-	-	-	-	-	-	-	-	-
222	/Hue18/	kaolinitic-illitic clay	-	PL2_20_PL7_80	pilot scale rotary kiln	-	700	-	-	-	71.594	-	25.918	1.436	-	0.146	0.274	-	-	0.118	0.596	0.510168	2.65384	-	-	-	-	-	-	-	-	-	-	-	-	-	-	-	-	-	-	-	-	-	-	-	-	-	-
223	/Lem18/	illitic clay	Argentina	L	-	-	900	-	3.68	-	61.07	-	17.8	7.5	-	2.61	-	-	-	1.45	4.05	4.1149	3.29616	-	-	-	-	-	-	-	-	-	-	-	-	-	-	-	-	-	-	-	-	-	-	-	-	-	-
224	/Lem18/	illitic clay	Argentina	L	-	-	1000	-	3.68	-	61.07	-	17.8	7.5	-	2.61	-	-	-	1.45	4.05	4.1149	3.29616	-	-	-	-	-	-	-	-	-	-	-	-	-	-	-	-	-	-	-	-	-	-	-	-	-	-
225	/Lem18/	illitic clay	Argentina	L	-	-	1100	-	3.68	-	61.07	-	17.8	7.5	-	2.61	-	-	-	1.45	4.05	4.1149	3.29616	-	-	-	-	-	-	-	-	-	-	-	-	-	-	-	-	-	-	-	-	-	-	-	-	-	-
226	/Fri10/	kaolinitic paper sludge	-	CPS	-	-	650	02:00	47.6	0.06	10.7	0.2	6.7	0.4	0.01	0.9	24.1	0.3	0.2	0.2	0.2	0.3316	1.53429	23.4	0.06	21.1	0.2	13.6	0.5	0.01	2.2	37.8	0.3	0.2	0.1	0.3	0.2974	1.49054	3	-	-	-	-	-	-	-	-	-	-
227	/Gon09/	calcined-clay brick	-	GB	-	-	850	-	-	-	-	-	-	-	-	-	-	-	-	-	-	-	-	-	-	63.89	Traces	25.49	7.73	Traces	0.4	0.29	-	-	Traces	0.95	0.6251	2.40803	-	-	-	-	-	-	-	-	-	-	-
228	/Gon09/	calcined-clay brick	-	GB	-	-	850	-	-	-	-	-	-	-	-	-	-	-	-	-	-	-	-	-	-	63.89	Traces	25.49	7.73	Traces	0.4	0.29	-	-	Traces	0.95	0.6251	2.40803	-	-	-	-	-	-	-	-	-	-	-
229	/Gon09/	calcined-clay brick	-	GB	-	-	850	-	-	-	-	-	-	-	-	-	-	-	-	-	-	-	-	-	-	63.89	Traces	25.49	7.73	Traces	0.4	0.29	-	-	Traces	0.95	0.6251	2.40803	-	-	-	-	-	-	-	-	-	-	-
230	/Gon09/	calcined-clay brick	-	GB	-	-	850	-	-	-	-	-	-	-	-	-	-	-	-	-	-	-	-	-	-	63.89	Traces	25.49	7.73	Traces	0.4	0.29	-	-	Traces	0.95	0.6251	2.40803	-	-	-	-	-	-	-	-	-	-	-
231	/Gon09/	metakaolin	-	Mk1	-	-	-	-	-	-	-	-	-	-	-	-	-	-	-	-	-	-	-	-	-	51.2	0.41	35.3	4	1.28	0.4	2.62	-	-	Traces	0.97	0.63826	1.39346	-	-	-	-	-	-	-	-	-	-	-
232	/Gon09/	metakaolin	-	Mk1	-	-	-	-	-	-	-	-	-	-	-	-	-	-	-	-	-	-	-	-	-	51.2	0.41	35.3	4	1.28	0.4	2.62	-	-	Traces	0.97	0.63826	1.39346	-	-	-	-	-	-	-	-	-	-	-
233	/Gon09/	metakaolin	-	Mk1	-	-	-	-	-	-	-	-	-	-	-	-	-	-	-	-	-	-	-	-	-	51.2	0.41	35.3	4	1.28	0.4	2.62	-	-	Traces	0.97	0.63826	1.39346	-	-	-	-	-	-	-	-	-	-	-
234	/Gon09/	metakaolin	-	Mk1	-	-	-	-	-	-	-	-	-	-	-	-	-	-	-	-	-	-	-	-	-	51.2	0.41	35.3	4	1.28	0.4	2.62	-	-	Traces	0.97	0.63826	1.39346	-	-	-	-	-	-	-	-	-	-	-
235	/Gon09/	metakaolin	-	Mk2	-	-	550	02:00	-	-	-	-	-	-	-	-	-	-	-	-	-	-	-	-	-	52.46	1.28	44.24	2.06	Traces	Traces	Traces	-	-	Traces	Traces	-	1.13923	-	-	-	-	-	-	-	-	-	-	-
236	/Gon09/	metakaolin	-	Mk2	-	-	550	02:00	-	-	-	-	-	-	-	-	-	-	-	-	-	-	-	-	-	52.46	1.28	44.24	2.06	Traces	Traces	Traces	-	-	Traces	Traces	-	1.13923	-	-	-	-	-	-	-	-	-	-	-
237	/Gon09/	metakaolin	-	Mk2	-	-	550	02:00	-	-	-	-	-	-	-	-	-	-	-	-	-	-	-	-	-	52.46	1.28	44.24	2.06	Traces	Traces	Traces	-	-	Traces	Traces	-	1.13923	-	-	-	-	-	-	-	-	-	-	-
238	/Gon09/	metakaolin	-	Mk2	-	-	550	02:00	-	-	-	-	-	-	-	-	-	-	-	-	-	-	-	-	-	52.46	1.28	44.24	2.06	Traces	Traces	Traces	-	-	Traces	Traces	-	1.13923	-	-	-	-	-	-	-	-	-	-	-
239	/Gut08/	metakaolin	Colombia	MKN	-	-	600	-	14.05	-	45.5	-	38.9	1.3	-	-	-	-	-	-	-	-	1.12373	-	-	-	-	-	-	-	-	-	-	-	-	-	-	-	3.57	-	-	-	-	-	-	-	-	-	-
240	/Gut08/	metakaolin	Colombia	MKN	-	-	800	-	14.05	-	45.5	-	38.9	1.3	-	-	-	-	-	-	-	-	1.12373	-	-	-	-	-	-	-	-	-	-	-	-	-	-	-	3.57	-	-	-	-	-	-	-	-	-	-
241	/Fri08/	kaolinitic paper sludge	-	CCW	-	-	700-800 °C	02:00	48	-	18.01	< 1	10.14	< 1	-	2.58	19.82	-	< 1	< 1	< 1	< 1,66	1.70638	14.5	0.04	30.2	< 0.7	18	< 0.7	-	3.7	31.4	0.27	< 0.7	< 0.7	< 0.7	-	1.61189	2.57	-	0.85					-	-	-	-
242	/O'Fa06/	illitic-kaolinitic clay	-	HTC QC	-	-	800 °C	02:00	-	-	-	-	-	-	-	-	-	-	-	-	-	-	-	0.6	-	54.8	1	19.1	6	-	1.8	9.4	2.9	-	0.5	3.2	2.6056	2.75643	2.81	-	-	-	-	-	-	-	-	-	-
243	/O'Fa06/	illitic-kaolinitic clay	-	HTC QC	-	-	800 °C	02:00	-	-	-	-	-	-	-	-	-	-	-	-	-	-	-	0.6	-	54.8	1	19.1	6	-	1.8	9.4	2.9	-	0.5	3.2	2.6056	2.75643	2.81	-	-	-	-	-	-	-	-	-	-
244	/O'Fa06/	illitic-kaolinitic clay	-	HTC QC	-	-	800 °C	02:00	-	-	-	-	-	-	-	-	-	-	-	-	-	-	-	0.6	-	54.8	1	19.1	6	-	1.8	9.4	2.9	-	0.5	3.2	2.6056	2.75643	2.81	-	-	-	-	-	-	-	-	-	-
245	/O'Fa06/	illitic-kaolinitic clay	-	HTC SC	-	-	800 °C	02:00	-	-	-	-	-	-	-	-	-	-	-	-	-	-	-	0.6	-	54.8	1	19.1	6	-	1.8	9.4	2.9	-	0.5	3.2	2.6056	2.75643	2.81	-	-	-	-	-	-	-	-	-	-
246	/O'Fa06/	illitic-kaolinitic clay	-	HTC SC	-	-	800 °C	02:00	-	-	-	-	-	-	-	-	-	-	-	-	-	-	-	0.6	-	54.8	1	19.1	6	-	1.8	9.4	2.9	-	0.5	3.2	2.6056	2.75643	2.81	-	-	-	-	-	-	-	-	-	-
247	/O'Fa06/	illitic-kaolinitic clay	-	HTC SC	-	-	800 °C	02:00	-	-	-	-	-	-	-	-	-	-	-	-	-	-	-	0.6	-	54.8	1	19.1	6	-	1.8	9.4	2.9	-	0.5	3.2	2.6056	2.75643	2.81	-	-	-	-	-	-	-	-	-	-
248	/He96/	Na-montmorillonite	-	NaM	muffle furnace	-	740	01:40	5.91	-	63.56	0.11	19.29	3.51	-	2.73	1.66	-	0.05	1.54	0.57	1.91506	3.16557	-	-	-	-	-	-	-	-	-	-	-	-	-	-	-	-	-	-	-	-	-	-	-	-	-	-
249	/He96/	Na-montmorillonite	-	NaM	muffle furnace	-	830	01:40	5.91	-	63.56	0.11	19.29	3.51	-	2.73	1.66	-	0.05	1.54	0.57	1.91506	3.16557	-	-	-	-	-	-	-	-	-	-	-	-	-	-	-	-	-	-	-	-	-	-	-	-	-	-
250	/He96/	Na-montmorillonite	-	NaM	muffle furnace	-	920	01:40	5.91	-	63.56	0.11	19.29	3.51	-	2.73	1.66	-	0.05	1.54	0.57	1.91506	3.16557	-	-	-	-	-	-	-	-	-	-	-	-	-	-	-	-	-	-	-	-	-	-	-	-	-	-
251	/He96/	Ca-montmorillonite	-	CaM	muffle furnace	-	730	01:40	5.97	-	70.5	0.23	15.57	0.67	-	3.57	1.63	-	0.03	0.35	0.1	0.4158	4.35011	-	-	-	-	-	-	-	-	-	-	-	-	-	-	-	-	-	-	-	-	-	-	-	-	-	-
252	/He96/	Ca-montmorillonite	-	CaM	muffle furnace	-	830	01:40	5.97	-	70.5	0.23	15.57	0.67	-	3.57	1.63	-	0.03	0.35	0.1	0.4158	4.35011	-	-	-	-	-	-	-	-	-	-	-	-	-	-	-	-	-	-	-	-	-	-	-	-	-	-
253	/He96/	Ca-montmorillonite	-	CaM	muffle furnace	-	930	01:40	5.97	-	70.5	0.23	15.57	0.67	-	3.57	1.63	-	0.03	0.35	0.1	0.4158	4.35011	-	-	-	-	-	-	-	-	-	-	-	-	-	-	-	-	-	-	-	-	-	-	-	-	-	-
254	/Bra18/	mixed clay	bulgaria	S	laboratory furnace	< 0.5	800	00:20	6.98	-	56.6	0.71	21.74	7.88	-	1.49	0.7	-	-	0.31	3.14	2.37612	2.50125	-	-	-	-	-	-	-	-	-	-	-	-	-	-	-	-	-	-	-	-	-	-	-	-	-	-
255	/Bra18/	smectitic-kaolinitic clay	bulgaria	Ch	laboratory furnace	< 0.5	800	00:20	6.87	-	67	0.83	18.59	2.98	-	1.32	0.38	-	-	0.27	1.6	1.3228	3.46254	-	-	-	-	-	-	-	-	-	-	-	-	-	-	-	-	-	-	-	-	-	-	-	-	-	-
256	/Bra18/	smectitic-kaolinitic clay	bulgaria	SK	laboratory furnace	< 0.5	800	00:20	8.81	-	58.18	0.8	25.67	3.48	-	1.21	0.47	-	-	0.19	1.14	0.94012	2.17745	-	-	-	-	-	-	-	-	-	-	-	-	-	-	-	-	-	-	-	-	-	-	-	-	-	-
257	/Bra18/	smectitic clay	bulgaria	B	laboratory furnace	< 0.5	780	00:20	8.95	-	58.72	0.89	15.28	5.33	0.09	2.17	6.51	-	0.13	1.89	0.01	1.89658	3.69201	-	-	-	-	-	-	-	-	-	-	-	-	-	-	-	-	-	-	-	-	-	-	-	-	-	-
258	/Bra18/	kaolin	bulgaria	K	laboratory furnace	< 0.5	800	00:20	13.24	-	47.8	0.28	37	0.69	-	0.12	0.13	-	-	0.1	0.44	0.38952	1.24115	-	-	-	-	-	-	-	-	-	-	-	-	-	-	-	-	-	-	-	-	-	-	-	-	-	-
259	/Bra18/	mixed clay	bulgaria	M	laboratory furnace	< 0.5	800	00:20	8.32	-	49.04	0.95	21.23	8.46	0.11	2.15	2.26	-	0.17	0.92	4.1	3.6178	2.21922	-	-	-	-	-	-	-	-	-	-	-	-	-	-	-	-	-	-	-	-	-	-	-	-	-	-
260	/Bra18/	mixed clay	bulgaria	D	laboratory furnace	< 0.5	780	00:20	7.88	-	58.58	0.83	16.72	6.38	0.09	0.1	6.08	-	0.31	0.1	2.93	2.02794	3.36599	-	-	-	-	-	-	-	-	-	-	-	-	-	-	-	-	-	-	-	-	-	-	-	-	-	-
261	/Bra18/	illitic-smectitic clay	bulgaria	BB	laboratory furnace	< 0.5	800	00:20	6.71	-	59.23	0.63	18.77	6.05	0.05	1.79	2.33	-	0.19	1.05	2.87	2.93846	3.03164	-	-	-	-	-	-	-	-	-	-	-	-	-	-	-	-	-	-	-	-	-	-	-	-	-	-
262	/Mou01/	kaolinitic clay	-	Sample 1	static laboratory furnace	-	750	02:00	8.3	-	71	1.5	18.1	0.5	-	0.1	-	-	-	-	-	-	3.7686	-	-	-	-	-	-	-	-	-	-	-	-	-	-	-	0.46	-	-	-	-	-	-	-	-	-	-
263	/Mou01/	kaolinitic clay	-	Sample 2	static laboratory furnace	-	750	02:00	11.7	-	59.4	1.9	25.1	1.4	-	0.2	-	-	-	-	-	-	2.27359	-	-	-	-	-	-	-	-	-	-	-	-	-	-	-	0.46	-	-	-	-	-	-	-	-	-	-
264	/Mai20, Mai21/	kaolinitic clay	Germany	KT	muffle furnace	-	800	00:30:00	5.2	-	66	1	18.1	6.2	-	0.4	0.1	0	-	0.3	2.7	2.0766	3.5032	-	-	-	-	-	-	-	-	-	-	-	-	-	-	-	-	-	-	-	-	-	-	-	-	-	-
265	/Mai20, Mai21/	chloride and mica-rich	Germany	KUP	muffle furnace	-	620	00:30:00	5.8	-	67.1	1	17.8	3.9	-	1	0	0	-	0.1	3.4	2.3372	3.62161	-	-	-	-	-	-	-	-	-	-	-	-	-	-	-	-	-	-	-	-	-	-	-	-	-	-
266	/Mai20, Mai21/	smectitic mixed clay	Germany	FUP	muffle furnace	-	650	00:30:00	11.8	-	55.7	1.1	26.4	3.9	-	0.3	0.2	0	-	0.1	0.6	0.4948	2.02699	-	-	-	-	-	-	-	-	-	-	-	-	-	-	-	-	-	-	-	-	-	-	-	-	-	-
267	/Mai20, Mai21/	kaolinitic clay	Germany	RKUP	muffle furnace	-	680	00:30:00	6.3	-	67.1	0.9	19.8	5.4	-	0.1	0.1	0	-	0	0.3	0.1974	3.25579	-	-	-	-	-	-	-	-	-	-	-	-	-	-	-	-	-	-	-	-	-	-	-	-	-	-
268	/Mai20, Mai21/	smectitic-kaolinitic clay	Germany	AC	muffle furnace	-	680	00:30:00	12.1	-	51.1	0.9	17.6	6.4	-	2.3	5.4	1.9	-	0.3	2.1	1.6818	2.78938	-	-	-	-	-	-	-	-	-	-	-	-	-	-	-	-	-	-	-	-	-	-	-	-	-	-
269	/Mai20, Mai21/	smectitic clay	Germany	SW	muffle furnace	-	810	00:30:00	5.6	-	64.3	0.9	16.9	7.2	-	2.1	0.1	0	-	0.2	2.7	1.9766	3.65531	-	-	-	-	-	-	-	-	-	-	-	-	-	-	-	-	-	-	-	-	-	-	-	-	-	-
270	/Mai20, Mai21/	kaolinitc clay	Germany	SCW	muffle furnace	-	620	00:30:00	9.4	-	55.5	1.3	25.3	5.1	-	0.5	0.2	0	-	0.1	2.6	1.8108	2.10752	-	-	-	-	-	-	-	-	-	-	-	-	-	-	-	-	-	-	-	-	-	-	-	-	-	-
271	/Mai20, Mai21/	kaolinitc clay	Germany	CCW	muffle furnace	-	660	00:30:00	36.6	-	40.7	0.6	13.7	3.3	-	1.2	1.2	0.5	-	0.4	1.9	1.6502	2.85413	-	-	-	-	-	-	-	-	-	-	-	-	-	-	-	-	-	-	-	-	-	-	-	-	-	-
272	/Mai20, Mai21/	smectitic clay	Germany	MOSM	muffle furnace	-	700	00:30:00	16.2	-	48.8	0.7	13.1	5.2	-	4.6	8.9	0.2	-	0.3	2	1.616	3.57889	-	-	-	-	-	-	-	-	-	-	-	-	-	-	-	-	-	-	-	-	-	-	-	-	-	-
273	/Mai20, Mai21/	kaolinitc-smectitic clay	Germany	SLS	muffle furnace	-	740	00:30:00	5.7	-	65.4	0.9	16.9	6.2	-	0.6	0.2	0	-	0.1	4.1	2.7978	3.71784	-	-	-	-	-	-	-	-	-	-	-	-	-	-	-	-	-	-	-	-	-	-	-	-	-	-
274	/Mai20, Mai21/	kaolinitc clay	Germany	KS	muffle furnace	-	650	00:30:00	11.7	-	54.4	0.2	32.5	0.4	-	0.3	0.2	0	-	< 0.1	0.3	0.1974	1.60811	-	-	-	-	-	-	-	-	-	-	-	-	-	-	-	-	-	-	-	-	-	-	-	-	-	-
275	/Mai21/	kaolinitc-smectitic clay	Germany	OC	muffle furnace	-	680	00:30:00	11.5	-	48.1	1	20.6	6.5	-	2.3	3.6	1.2	-	0.1	5.2	3.5216	2.24325	-	-	-	-	-	-	-	-	-	-	-	-	-	-	-	-	-	-	-	-	-	-	-	-	-	-
276	/Lon22/	-	-	CY1	-	-	-	-	-	-	-	-	-	-	-	-	-	-	-	-	-	-	-	1.48	-	56.74	0.19	35.83	1.96	-	0.34	-	-	0.03	0.03	3.31	2.20798	1.5214	-	-	-	-	-	-	-	-	-	-	-
277	/Lon22/	-	-	CY2	-	-	-	-	-	-	-	-	-	-	-	-	-	-	-	-	-	-	-	1.18	-	71.61	1.1	22.57	2.51	-	0.11	0.55	0.01	0.03	-	0.26	0.17108	3.04819	-	-	-	-	-	-	-	-	-	-	-
278	/Lon22/	-	-	CY3	-	-	-	-	-	-	-	-	-	-	-	-	-	-	-	-	-	-	-	0.72	-	68.44	1.15	27.4	1	-	0.1	0.06	0.01	0.1	-	1.15	0.7567	2.39971	-	-	-	-	-	-	-	-	-	-	-
279	/Lon22/	-	-	CY4	-	-	-	-	-	-	-	-	-	-	-	-	-	-	-	-	-	-	-	0.66	-	60.35	0.89	17.73	6.81	0.03	2.66	3.45	0.95	0.09	0.08	6.12	4.10696	3.27015	-	-	-	-	-	-	-	-	-	-	-
280	/Lon22/	-	-	CY5	-	-	-	-	-	-	-	-	-	-	-	-	-	-	-	-	-	-	-	0.8	-	70.61	1.45	20.81	2.45	-	0.84	0.29	0.01	0.05	0.09	2.59	1.79422	3.25982	-	-	-	-	-	-	-	-	-	-	-
281	/Lon22/	-	-	CY6	-	-	-	-	-	-	-	-	-	-	-	-	-	-	-	-	-	-	-	2.26	-	53.06	1.02	21.74	8.02	0.13	2.76	5.72	1.29	0.3	0.31	3.08	2.33664	2.34481	-	-	-	-	-	-	-	-	-	-	-
282	/Lon22/	-	-	CY7	-	-	-	-	-	-	-	-	-	-	-	-	-	-	-	-	-	-	-	3.21	-	49.28	3.635	42.29	2.229	0.01	0.033	0.632	0.058	0.086	0.155	0.061	0.195138	1.11952	-	-	-	-	-	-	-	-	-	-	-
283	/Lon22/	-	-	CY8	-	-	-	-	-	-	-	-	-	-	-	-	-	-	-	-	-	-	-	3.55	-	50.76	1.8	42.7	0.599	-	0.023	0.017	0.01	0.116	0.047	0.114	0.122012	1.14207	-	-	-	-	-	-	-	-	-	-	-
284	/Lon22/	-	-	CY9	-	-	-	-	-	-	-	-	-	-	-	-	-	-	-	-	-	-	-	1.3	-	61.1465	1.6258	32.9608	1.2558	0.0072	0.1174	0.1198	0.0164	0.0391	0.0602	0.6944	0.517115	1.78227	-	-	-	-	-	-	-	-	-	-	-
285	/Lon22/	-	-	CY10	-	-	-	-	-	-	-	-	-	-	-	-	-	-	-	-	-	-	-	1.1	-	54.2488	1.9673	38.6294	1.9968	0.0069	0.1803	0.1316	0.0093	0.0528	0.0768	1.2345	0.889101	1.34919	-	-	-	-	-	-	-	-	-	-	-
286	/ibac/	-	Germany	B8363	-	-	-	-	-	-	-	-	-	-	-	-	-	-	-	-	-	-	-	1.25	-	61.42	0.9	22.02	7.03	0.14	1.61	0.81	0.45	0.13	0.24	3.2	2.3456	2.67974	2.84	-	-	-	1.02	-	-	1.87	0.51	-	-
287	/ibac/	-	Germany	B8400	-	-	-	-	-	-	-	-	-	-	-	-	-	-	-	-	-	-	-	0.7	-	57.59	1.03	25.42	7.02	0.14	1.96	0.64	0.3	0.1	0.15	3.92	2.72936	2.17656	-	-	-	-	-	-	-	-	-	-	-
288	/ibac/	-	Germany	B8457	-	-	-	-	-	-	-	-	-	-	-	-	-	-	-	-	-	-	-	0.94	-	62.01	1.01	22.09	7.97	0.17	1.74	0.58	0.34	0.12	0.18	3.36	2.39088	2.69691	2.36	-	-	-	1.36	-	-	2.14	0.58	-	-
289	/ibac/	-	Germany	A-rot	-	-	-	-	-	-	-	-	-	-	-	-	-	-	-	-	-	-	-	1.56	-	53.5742	1.28988	27.8948	6.97125	0.0590784	1.97913	0.777865	0.177235	0.0590784	0.521859	4.81489	3.69006	1.84515	-	-	-	-	-	-	-	-	-	-	-
290	/ibac/	-	Germany	A (0-2)	-	-	-	-	-	-	-	-	-	-	-	-	-	-	-	-	-	-	-	7.38	-	44.3472	1.13615	27.1745	12.1997	0.111753	1.63904	0.968523	0.130378	0.167629	0.400447	4.40492	3.29888	1.56785	-	-	-	-	-	-	-	-	-	-	-
291	/ibac/	-	Germany	B-LG	-	-	-	-	-	-	-	-	-	-	-	-	-	-	-	-	-	-	-	1.29	-	54.2798	1.2637	27.2287	6.63442	0.0789811	2.30033	0.937901	0.0789811	0.0296179	0.533123	4.91658	3.76823	1.91518	-	-	-	-	-	-	-	-	-	-	-
292	/ibac/	-	-	B1	-	-	-	-	11.59	-	52.45	1.8	30.86	1.55	0.01	0,27	0.27	0.01	0.12	0.01	0.99	0.66142	1.63286	-	-	-	-	-	-	-	-	-	-	-	-	-	-	-	-	-	-	-	-	-	-	-	-	-	-
293	/ibac/	-	-	B2	-	-	-	-	14.19	-	36.98	2.13	30.38	14.84	0.03	0.2	0.27	0.01	0.21	0.03	0.05	0.0629	1.16944	-	-	-	-	-	-	-	-	-	-	-	-	-	-	-	-	-	-	-	-	-	-	-	-	-	-
294	/ibac/	-	-	C1	-	-	-	-	14.53	-	27.52	3.17	27.18	26.24	0.14	0.62	0.32	0.01	0.19	0.01	0.03	0.02974	0.972744	-	-	-	-	-	-	-	-	-	-	-	-	-	-	-	-	-	-	-	-	-	-	-	-	-	-
295	/ibac/	-	-	C2	-	-	-	-	11.36	-	49.87	1.08	25.73	7.49	0.03	1.13	0.74	0.01	0.22	0.21	1.29	1.05882	1.86208	-	-	-	-	-	-	-	-	-	-	-	-	-	-	-	-	-	-	-	-	-	-	-	-	-	-
296	/ibac/	-	-	C3	-	-	-	-	11.3	-	55.04	0.57	25.5	5.18	0.03	0.44	0.16	0.01	0.13	0.01	1.61	1.06938	2.07366	-	-	-	-	-	-	-	-	-	-	-	-	-	-	-	-	-	-	-	-	-	-	-	-	-	-
297	/ibac/	-	-	D1	-	-	-	-	6.57	-	70.68	1.13	14.48	4.55	0.01	0.38	0.97	0.06	0.04	0.01	1.1	0.7338	4.68951	-	-	-	-	-	-	-	-	-	-	-	-	-	-	-	-	-	-	-	-	-	-	-	-	-	-
298	/ibac/	-	-	D2	-	-	-	-	11	-	54.01	0.93	15.37	9.72	0.07	3.26	0.71	1.16	0.03	1.34	1.84	2.55072	3.37598	-	-	-	-	-	-	-	-	-	-	-	-	-	-	-	-	-	-	-	-	-	-	-	-	-	-
299	/ibac/	kaolinitc clay	-	Mk1	-	-	-	-	-	-	-	-	-	-	-	-	-	-	-	-	-	-	-	1.84	-	50.7	1.26	42.86	0.55	< 0.01	0.16	0.01	0.08	0.09	0.41	0.26	-	-	-	-	-	-	-	-	-	-	-	-	-
300	/ibac/	kaolinitc clay	-	Mk2	-	-	-	-	-	-	-	-	-	-	-	-	-	-	-	-	-	-	-	1	-	56.27	1.01	37.85	0.87	0.01	0.23	0.25	< 0.01	0.08	0.07	1.57	-	-	-	-	-	-	-	-	-	-	-	-	-
301	/ibac/	kaolinitc clay	-	Mk3	-	-	-	-	-	-	-	-	-	-	-	-	-	-	-	-	-	-	-	0.97	-	52.68	0.94	40.39	1.97	0.01	0.27	0.4	0.04	0.06	0.02	1.47	-	-	-	-	-	-	-	-	-	-	-	-	-
302	/ibac/	kaolinitc clay	-	Mk4	-	-	-	-	-	-	-	-	-	-	-	-	-	-	-	-	-	-	-	1.71	-	51.34	0.41	33.65	0.73	0.01	0.37	0.67	0.02	0.35	8.58	1.85	-	-	-	-	-	-	-	-	-	-	-	-	-
303	/ibac/	kaolinitc clay	-	Mk5	-	-	-	-	-	-	-	-	-	-	-	-	-	-	-	-	-	-	-	1.97	-	54.2	0.17	40.02	1.25	0.02	0.14	0.07	0.02	0.07	0.01	1.19	-	-	-	-	-	-	-	-	-	-	-	-	-
304
305
306
307
308
309
310
311
312
313
314
315
316
317
318
319
320
321
322
323
324
325
326
327
328
329
330
331
332
333
334
335
336
337
338
339
340
341
342
343
344
345
346
347
348
349
350
351
352
353
354
355
356
357
358
359
360
361
362
363
364
365
366
367
368
369
370
371
372
373
374
375
376
377
378
379
380
381
382
383
384
385
386
387
388
389
390
391
392
393
394
395
396
397
398
399
400
401
402
403
404
405
406
407
408
409
410
411
412
413
414
415
416
417
418
419
420
421
422
423
424
425
426
427
428
429
430
431
432
433
434
435
436
437
438
439
440
441
442
443
444
445
446
447
448
449
450
451
452
453
454
455
456
457
458
459
460
461
462
463
464
465
466
467
468
469
470
471
472
473
474
475
476
477
478
479
480
481
482
483
484
485
486
487
488
489
490
491
492
493
494
495
496
497
498
499
500
501
502
503
504
505
506
507
508
509
510
511
512
513
514
515
516
517
518
519
520
521
522
523
524
525
526
527
528
529
530
531
532
533
534
535
536
537
538
539
540
541
542
543
544
545
546
547
548
549
550
551
552
553
554
555
556
557
558
559
560
561
562
563
564
565
566
567
568
569
570
571
572
573
574
575
576
577
578
579
580
581
582
583
584
585
586
587
588
589
590
591
592
593
594
595
596
597
598
599
600
601
602
603
604
605
606
607
608
609
610
611
612
613
614
615
616
617
618
619
620
621
622
623
624
625
626
627
628
629
630
631
632
633
634
635
636
637
638
639
640
641
642
643
644
645
646
647
648
649
650
651
652
653
654
655
656
657
658
659
660
661
662
663
664
665
666
667
668
669
670
671
672
673
674
675
676
677
678
679
680
681
682
683
684
685
686
687
688
689
690
691
692
693
694
695
696
697
698
699
700
701
702
703
704
705
706
707
708
709
710
711
712
713
714
715
716
717
718
719
720
721
722
723
724
725
726
727
728
729
730
731
732
733
734
735
736
737
738
739
740
741
742
743
744
745
746
747
748
749
750
751
752
753
754
755
756
757
758
759
760
761
762
763
764
765
766
767
768
769
770
771
772
773
774
775
776
777
778
779
780
781
782
783
784
785
786
787
788
789
790
791
792
793
794
795
796
797
798
799
800
801
802
803
804
805
806
807
808
809
810
811
812
813
814
815
816
817
818
819
820
821
822
823
824
825
826
827
828
829
830
831
832
833
834
835
836
837
838
839
840
841
842
843
844
845
846
847
848
849
850
851
852
853
854
855
856
857
858
859
860
861
862
863
864
865
866
867
868
869
870
871
872
873
874
875
876
877
878
879
880
881
882
883
884
885
886
887
888
889
890
891
892
893
894
895
896
897
898
899
900
901
902
903
904
905
906
907
908
909
910
911
912
913
914
915
916
917
918
919
920
921
922
923
924
925
926
927
928
929
930
931
932
933
934
935
936
937
938
939
940
941
942
943
944
945
946
947
948
949
950
951
952
953
954
955
956
957
958
959
960
961
962
963
964
965
966
967
968
969
970
971
972
973
974
975
976
977
978
979
980
981
982
983
984
985
986
987
988
989
990
991
992
993
994
995
996
997
998
999
1000
[truncated: 15 more columns]

## Sheet: mineralogical composition
sample No.	reference	Calcined Clay							mineralogical analysis of the raw clay																												mineralogical analysis of the calcined clay
		raw material category	origin country	sample name	calcination furnace	max. grainsize before calcination	calcination temperature	calcination duration	amor-phous	kaoli-nite	Na-smectite	Ca-smectite	nontro-nite	illite	mica	chlorite	pyro-phillite	talc	quartz	christo-balite	Na-feldspar	Ca-feldspar	K-feldspar	zeo-lithe	cal-cite	dolo-mite	side-rite	pyrite	magne-tite	hema-tite	goe-thite	gibb-site	gyp-sum	anhy-drite	ana-tase	rutile	amor-phous	kaoli-nite	Na-smectite	Ca-smectite	illite	mica	chlorite	quartz	Na-feldspar	Ca-feldspar	K-feldspar	cal-cite	dolo-mite
-		-		-	-	mm	°C	h	wt.-%	wt.-%	wt.-%	wt.-%	wt.-%	wt.-%	wt.-%	wt.-%	wt.-%	wt.-%	wt.-%	wt.-%	wt.-%	wt.-%	wt.-%	wt.-%	wt.-%	wt.-%	wt.-%	wt.-%	wt.-%	wt.-%	wt.-%	wt.-%	wt.-%	wt.-%	wt.-%	wt.-%	wt.-%	wt.-%	wt.-%	wt.-%	wt.-%	wt.-%	wt.-%	wt.-%	wt.-%	wt.-%	wt.-%	wt.-%	wt.-%
1	/Beu12/	illitic-kaolinitic clay	Germany	Lias Delta Clay	rotary kiln	< 100	< 950	00:35:00	-	20	-	-	-	28		22	-	-	22	-	5				3	-	-	-	-	-	-	-	-	-	-	-	46	-	-	-	22		-	22	8			-	-
2	/Beu12/	illitic-kaolinitic clay	Germany	Lias Delta Clay	rotary kiln	< 100	< 950	00:35:00	-	20	-	-	-	28		22	-	-	22	-	5				3	-	-	-	-	-	-	-	-	-	-	-	46	-	-	-	22		-	22	8			-	-
3	/Beu12/	illitic-kaolinitic clay	Germany	Lias Delta Clay	rotary kiln	< 100	< 950	00:35:00	-	20	-	-	-	28		22	-	-	22	-	5				3	-	-	-	-	-	-	-	-	-	-	-	46	-	-	-	22		-	22	8			-	-
4	/Dan13/	kaolinitic clay	Portugal	AB1080	muffle kiln	-	700	00:45:00	-	46.7	-	-	-	1.5	-	-	-	-	17.5	-	-		34.3	-	-	-	-	-	-	-	-	-	-	-	-	-	-	-	-	-	-	-	-	-	-	-	-	-	-
5	/Dan13/	kaolinitic clay	Portugal	AB1080	muffle kiln	-	725	00:45:00	-	46.7	-	-	-	1.5	-	-	-	-	17.5	-	-		34.3	-	-	-	-	-	-	-	-	-	-	-	-	-	-	-	-	-	-	-	-	-	-	-	-	-	-
6	/Dan13/	kaolinitic clay	Portugal	AB1080	muffle kiln	-	750	00:45:00	-	46.7	-	-	-	1.5	-	-	-	-	17.5	-	-		34.3	-	-	-	-	-	-	-	-	-	-	-	-	-	-	-	-	-	-	-	-	-	-	-	-	-	-
7	/Dan13/	kaolinitic clay	Portugal	AB1080	muffle kiln	-	775	00:45:00	-	46.7	-	-	-	1.5	-	-	-	-	17.5	-	-		34.3	-	-	-	-	-	-	-	-	-	-	-	-	-	-	-	-	-	-	-	-	-	-	-	-	-	-
8	/Dan13/	kaolinitic clay	Portugal	AB1080	muffle kiln	-	800	00:45:00	-	46.7	-	-	-	1.5	-	-	-	-	17.5	-	-		34.3	-	-	-	-	-	-	-	-	-	-	-	-	-	-	-	-	-	-	-	-	-	-	-	-	-	-
9	/Dan13/	kaolinitic clay	Portugal	Aldeia e Irmao	muffle kiln	-	700	00:45:00	-	33.8	-	-	-	6	-	-	-	-	38.5	-	-		21.7	-	-	-	-	-	-	-	-	-	-	-	-	-	-	-	-	-	-	-	-	-	-	-	-	-	-
10	/Dan13/	kaolinitic clay	Portugal	Aldeia e Irmao	muffle kiln	-	725	00:45:00	-	33.8	-	-	-	6	-	-	-	-	38.5	-	-		21.7	-	-	-	-	-	-	-	-	-	-	-	-	-	-	-	-	-	-	-	-	-	-	-	-	-	-
11	/Dan13/	kaolinitic clay	Portugal	Aldeia e Irmao	muffle kiln	-	750	00:45:00	-	33.8	-	-	-	6	-	-	-	-	38.5	-	-		21.7	-	-	-	-	-	-	-	-	-	-	-	-	-	-	-	-	-	-	-	-	-	-	-	-	-	-
12	/Dan13/	kaolinitic clay	Portugal	Aldeia e Irmao	muffle kiln	-	775	00:45:00	-	33.8	-	-	-	6	-	-	-	-	38.5	-	-		21.7	-	-	-	-	-	-	-	-	-	-	-	-	-	-	-	-	-	-	-	-	-	-	-	-	-	-
13	/Dan13/	kaolinitic clay	Portugal	Aldeia e Irmao	muffle kiln	-	800	00:45:00	-	33.8	-	-	-	6	-	-	-	-	38.5	-	-		21.7	-	-	-	-	-	-	-	-	-	-	-	-	-	-	-	-	-	-	-	-	-	-	-	-	-	-
14	/Dan13/	kaolinitic clay	Portugal	Kal-Sorgila	muffle kiln	-	700	00:45:00	-	27.6	-	-	-	1.7	-	-	-	-	47.1	-	-		19.2	-	1.6	-	2.7	-	-	-	-	-	-	-	-	-	-	-	-	-	-	-	-	-	-	-	-	-	-
15	/Dan13/	kaolinitic clay	Portugal	Kal-Sorgila	muffle kiln	-	725	00:45:00	-	27.6	-	-	-	1.7	-	-	-	-	47.1	-	-		19.2	-	1.6	-	2.7	-	-	-	-	-	-	-	-	-	-	-	-	-	-	-	-	-	-	-	-	-	-
16	/Dan13/	kaolinitic clay	Portugal	Kal-Sorgila	muffle kiln	-	750	00:45:00	-	27.6	-	-	-	1.7	-	-	-	-	47.1	-	-		19.2	-	1.6	-	2.7	-	-	-	-	-	-	-	-	-	-	-	-	-	-	-	-	-	-	-	-	-	-
17	/Dan13/	kaolinitic clay	Portugal	Kal-Sorgila	muffle kiln	-	775	00:45:00	-	27.6	-	-	-	1.7	-	-	-	-	47.1	-	-		19.2	-	1.6	-	2.7	-	-	-	-	-	-	-	-	-	-	-	-	-	-	-	-	-	-	-	-	-	-
18	/Dan13/	kaolinitic clay	Portugal	Kal-Sorgila	muffle kiln	-	800	00:45:00	-	27.6	-	-	-	1.7	-	-	-	-	47.1	-	-		19.2	-	1.6	-	2.7	-	-	-	-	-	-	-	-	-	-	-	-	-	-	-	-	-	-	-	-	-	-
19	/Dan13/	kaolinitic clay	Portugal	Argila Sorgia	muffle kiln	-	700	00:45:00	-	1	42.5		-	5.6	-	1	-	-	32.6	-	-		8.2	-	4.6	-	4.4	-	-	-	-	-	-	-	-	-	-	-	-	-	-	-	-	-	-	-	-	-	-
20	/Dan13/	kaolinitic clay	Portugal	Argila Sorgia	muffle kiln	-	750	00:45:00	-	1	42.5		-	5.6	-	1	-	-	32.6	-	-		8.2	-	4.6	-	4.4	-	-	-	-	-	-	-	-	-	-	-	-	-	-	-	-	-	-	-	-	-	-
21	/Dan13/	kaolinitic clay	Portugal	Argila Sorgia	muffle kiln	-	800	00:45:00	-	1	42.5		-	5.6	-	1	-	-	32.6	-	-		8.2	-	4.6	-	4.4	-	-	-	-	-	-	-	-	-	-	-	-	-	-	-	-	-	-	-	-	-	-
22	/Dan13/	illitic clay	Portugal	Argila Rascoia	muffle kiln	-	700	00:45:00	-	5.2	0.2		-	39.6	-	9.1	-	-	17.1	-	6.5		4.8	-	2.8	-	-	-	-	14.7	-	-	-	-	-	-	-	-	-	-	-	-	-	-	-	-	-	-	-
23	/Dan13/	illitic clay	Portugal	Argila Rascoia	muffle kiln	-	750	00:45:00	-	5.2	0.2		-	39.6	-	9.1	-	-	17.1	-	6.5		4.8	-	2.8	-	-	-	-	14.7	-	-	-	-	-	-	-	-	-	-	-	-	-	-	-	-	-	-	-
24	/Dan13/	illitic clay	Portugal	Argila Rascoia	muffle kiln	-	800	00:45:00	-	5.2	0.2		-	39.6	-	9.1	-	-	17.1	-	6.5		4.8	-	2.8	-	-	-	-	14.7	-	-	-	-	-	-	-	-	-	-	-	-	-	-	-	-	-	-	-
25	/Dan13/	smectitic marl	Denmark	Sovind Marl	muffle kiln	-	700	00:45:00	-	8.4	53.5		-	4.4	-	-	-	-	4.3	-	-		-	-	24.7	-	3.1	1.3	-	-	-	-	-	-	-	-	-	-	-	-	-	-	-	-	-	-	-	-	-
26	/Dan13/	smectitic marl	Denmark	Sovind Marl	muffle kiln	-	750	00:45:00	-	8.4	53.5		-	4.4	-	-	-	-	4.3	-	-		-	-	24.7	-	3.1	1.3	-	-	-	-	-	-	-	-	-	-	-	-	-	-	-	-	-	-	-	-	-
27	/Dan13/	smectitic marl	Denmark	Sovind Marl	muffle kiln	-	800	00:45:00	-	8.4	53.5		-	4.4	-	-	-	-	4.3	-	-		-	-	24.7	-	3.1	1.3	-	-	-	-	-	-	-	-	-	-	-	-	-	-	-	-	-	-	-	-	-
28	/Dan13/	smectitic marl	Denmark	Sovind Marl	muffle kiln	-	850	00:45:00	-	8.4	53.5		-	4.4	-	-	-	-	4.3	-	-		-	-	24.7	-	3.1	1.3	-	-	-	-	-	-	-	-	-	-	-	-	-	-	-	-	-	-	-	-	-
29	/Dan13/	smectitic marl	Denmark	Sovind Marl	muffle kiln	-	900	00:45:00	-	8.4	53.5		-	4.4	-	-	-	-	4.3	-	-		-	-	24.7	-	3.1	1.3	-	-	-	-	-	-	-	-	-	-	-	-	-	-	-	-	-	-	-	-	-
30	/Dan13/	smectitic marl	Denmark	Sovind Marl	muffle kiln	-	950	00:45:00	-	8.4	53.5		-	4.4	-	-	-	-	4.3	-	-		-	-	24.7	-	3.1	1.3	-	-	-	-	-	-	-	-	-	-	-	-	-	-	-	-	-	-	-	-	-
31	/Dan13/	smectitic marl	Denmark	Sovind Marl	muffle kiln	-	1000	00:45:00	-	8.4	53.5		-	4.4	-	-	-	-	4.3	-	-		-	-	24.7	-	3.1	1.3	-	-	-	-	-	-	-	-	-	-	-	-	-	-	-	-	-	-	-	-	-
32	/Dan13/	smectitic marl	Denmark	Sovind Marl	industrial rotary kiln	-	750	-	-	8.4	53.5		-	4.4	-	-	-	-	4.3	-	-		-	-	24.7	-	3.1	1.3	-	-	-	-	-	-	-	-	-	-	-	-	-	-	-	-	-	-	-	-	-
33	/Dan13/	smectitic marl	Denmark	Sovind Marl	industrial rotary kiln	-	800	-	-	8.4	53.5		-	4.4	-	-	-	-	4.3	-	-		-	-	24.7	-	3.1	1.3	-	-	-	-	-	-	-	-	-	-	-	-	-	-	-	-	-	-	-	-	-
34	/Dan13/	smectitic marl	Denmark	Sovind Marl	industrial rotary kiln	-	850	-	-	8.4	53.5		-	4.4	-	-	-	-	4.3	-	-		-	-	24.7	-	3.1	1.3	-	-	-	-	-	-	-	-	-	-	-	-	-	-	-	-	-	-	-	-	-
35	/Dan13/	smectitic marl	Denmark	Sovind Marl	industrial rotary kiln	-	900	-	-	8.4	53.5		-	4.4	-	-	-	-	4.3	-	-		-	-	24.7	-	3.1	1.3	-	-	-	-	-	-	-	-	-	-	-	-	-	-	-	-	-	-	-	-	-
36	/Dan13/	smectitic marl	Denmark	Sovind Marl	industrial rotary kiln	-	950	-	-	8.4	53.5		-	4.4	-	-	-	-	4.3	-	-		-	-	24.7	-	3.1	1.3	-	-	-	-	-	-	-	-	-	-	-	-	-	-	-	-	-	-	-	-	-
37	/Dan13/	smectitic marl	Denmark	Sovind Marl H2	muffle kiln	-	600	00:45:00	-	8.9	49.1	-	-	5.2	-	-	-	-	4.7	-	-	-	-	-	24.6	-	5.3	2.3	-	-	-	-	-	-	-	-	-	-	-	-	-	-	-	-	-	-	-	-	-
38	/Dan13/	smectitic marl	Denmark	Sovind Marl H2	muffle kiln	-	650	00:45:00	-	8.9	49.1	-	-	5.2	-	-	-	-	4.7	-	-	-	-	-	24.6	-	5.3	2.3	-	-	-	-	-	-	-	-	-	-	-	-	-	-	-	-	-	-	-	-	-
39	/Dan13/	smectitic marl	Denmark	Sovind Marl H2	muffle kiln	-	700	00:45:00	-	8.9	49.1	-	-	5.2	-	-	-	-	4.7	-	-	-	-	-	24.6	-	5.3	2.3	-	-	-	-	-	-	-	-	-	-	-	-	-	-	-	-	-	-	-	-	-
40	/Dan13/	smectitic marl	Denmark	Sovind Marl H2	muffle kiln	-	750	00:45:00	-	8.9	49.1	-	-	5.2	-	-	-	-	4.7	-	-	-	-	-	24.6	-	5.3	2.3	-	-	-	-	-	-	-	-	-	-	-	-	-	-	-	-	-	-	-	-	-
41	/Dan13/	smectitic marl	Denmark	Sovind Marl H2	muffle kiln	-	800	00:45:00	-	8.9	49.1	-	-	5.2	-	-	-	-	4.7	-	-	-	-	-	24.6	-	5.3	2.3	-	-	-	-	-	-	-	-	-	-	-	-	-	-	-	-	-	-	-	-	-
42	/Dan13/	smectitic marl	Denmark	Sovind Marl H2	muffle kiln	-	850	00:45:00	-	8.9	49.1	-	-	5.2	-	-	-	-	4.7	-	-	-	-	-	24.6	-	5.3	2.3	-	-	-	-	-	-	-	-	-	-	-	-	-	-	-	-	-	-	-	-	-
43	/Dan13/	smectitic marl	Denmark	Sovind Marl H3	muffle kiln	-	600	00:45:00	-	9.7	56.4	-	-	4.4	-	-	-	-	2.9	-	-	-	-	-	26.6	-	-	-	-	-	-	-	-	-	-	-	-	-	-	-	-	-	-	-	-	-	-	-	-
44	/Dan13/	smectitic marl	Denmark	Sovind Marl H3	muffle kiln	-	650	00:45:00	-	9.7	56.4	-	-	4.4	-	-	-	-	2.9	-	-	-	-	-	26.6	-	-	-	-	-	-	-	-	-	-	-	-	-	-	-	-	-	-	-	-	-	-	-	-
45	/Dan13/	smectitic marl	Denmark	Sovind Marl H3	muffle kiln	-	700	00:45:00	-	9.7	56.4	-	-	4.4	-	-	-	-	2.9	-	-	-	-	-	26.6	-	-	-	-	-	-	-	-	-	-	-	-	-	-	-	-	-	-	-	-	-	-	-	-
46	/Dan13/	smectitic marl	Denmark	Sovind Marl H3	muffle kiln	-	750	00:45:00	-	9.7	56.4	-	-	4.4	-	-	-	-	2.9	-	-	-	-	-	26.6	-	-	-	-	-	-	-	-	-	-	-	-	-	-	-	-	-	-	-	-	-	-	-	-
47	/Dan13/	smectitic marl	Denmark	Sovind Marl H3	muffle kiln	-	800	00:45:00	-	9.7	56.4	-	-	4.4	-	-	-	-	2.9	-	-	-	-	-	26.6	-	-	-	-	-	-	-	-	-	-	-	-	-	-	-	-	-	-	-	-	-	-	-	-
48	/Dan13/	smectitic marl	Denmark	Sovind Marl H3	muffle kiln	-	850	00:45:00	-	9.7	56.4	-	-	4.4	-	-	-	-	2.9	-	-	-	-	-	26.6	-	-	-	-	-	-	-	-	-	-	-	-	-	-	-	-	-	-	-	-	-	-	-	-
49	/Dan13/	smectitic marl	Denmark	Sovind Marl H4	muffle kiln	-	600	00:45:00	-	6.5	55.1	-	-	3.7	-	1.2	-	-	5.2	-	-	-	-	-	22.8	-	3.9	1.6	-	-	-	-	-	-	-	-	-	-	-	-	-	-	-	-	-	-	-	-	-
50	/Dan13/	smectitic marl	Denmark	Sovind Marl H4	muffle kiln	-	650	00:45:00	-	6.5	55.1	-	-	3.7	-	1.2	-	-	5.2	-	-	-	-	-	22.8	-	3.9	1.6	-	-	-	-	-	-	-	-	-	-	-	-	-	-	-	-	-	-	-	-	-
51	/Dan13/	smectitic marl	Denmark	Sovind Marl H4	muffle kiln	-	700	00:45:00	-	6.5	55.1	-	-	3.7	-	1.2	-	-	5.2	-	-	-	-	-	22.8	-	3.9	1.6	-	-	-	-	-	-	-	-	-	-	-	-	-	-	-	-	-	-	-	-	-
52	/Dan13/	smectitic marl	Denmark	Sovind Marl H4	muffle kiln	-	750	00:45:00	-	6.5	55.1	-	-	3.7	-	1.2	-	-	5.2	-	-	-	-	-	22.8	-	3.9	1.6	-	-	-	-	-	-	-	-	-	-	-	-	-	-	-	-	-	-	-	-	-
53	/Dan13/	smectitic marl	Denmark	Sovind Marl H4	muffle kiln	-	800	00:45:00	-	6.5	55.1	-	-	3.7	-	1.2	-	-	5.2	-	-	-	-	-	22.8	-	3.9	1.6	-	-	-	-	-	-	-	-	-	-	-	-	-	-	-	-	-	-	-	-	-
54	/Dan13/	smectitic marl	Denmark	Sovind Marl H4	muffle kiln	-	850	00:45:00	-	6.5	55.1	-	-	3.7	-	1.2	-	-	5.2	-	-	-	-	-	22.8	-	3.9	1.6	-	-	-	-	-	-	-	-	-	-	-	-	-	-	-	-	-	-	-	-	-
55	/Dan13/	illitic clay	Poland	Gniew	muffle kiln	-	700	00:45:00	-	8	2		-	33	-	-	-	-	22	-	4		4		15	4	-	-	-	-	8	-	-	-	-	-	-	-	-	-	-	-	-	-	-	-	-	-	-
56	/Dan13/	illitic clay	Poland	Gniew	muffle kiln	-	725	00:45:00	-	8	2		-	33	-	-	-	-	22	-	4		4		15	4	-	-	-	-	8	-	-	-	-	-	-	-	-	-	-	-	-	-	-	-	-	-	-
57	/Dan13/	illitic clay	Poland	Gniew	muffle kiln	-	750	00:45:00	-	8	2		-	33	-	-	-	-	22	-	4		4		15	4	-	-	-	-	8	-	-	-	-	-	-	-	-	-	-	-	-	-	-	-	-	-	-
58	/Dan13/	illitic clay	Poland	Gniew	muffle kiln	-	775	00:45:00	-	8	2		-	33	-	-	-	-	22	-	4		4		15	4	-	-	-	-	8	-	-	-	-	-	-	-	-	-	-	-	-	-	-	-	-	-	-
59	/Dan13/	illitic clay	Poland	Gniew	muffle kiln	-	800	00:45:00	-	8	2		-	33	-	-	-	-	22	-	4		4		15	4	-	-	-	-	8	-	-	-	-	-	-	-	-	-	-	-	-	-	-	-	-	-	-
60	/Tol07/	calcined-clay brick	Brazil	GCWCCB	-	-	850	-	-	-	-	-	-	-	-	-	-	-	-	-	-	-	-	-	-	-	-	-	-	-	-	-	-	-	-	-	61	-	-	-	1.5	-	-	27	-	-	2	-	-
61	/Tol07/	calcined-clay brick	Brazil	GCWCCB	-	-	850	-	-	-	-	-	-	-	-	-	-	-	-	-	-	-	-	-	-	-	-	-	-	-	-	-	-	-	-	-	61	-	-	-	1.5	-	-	27	-	-	2	-	-
62	/Tol07/	calcined-clay brick	Brazil	GCWCCB	-	-	850	-	-	-	-	-	-	-	-	-	-	-	-	-	-	-	-	-	-	-	-	-	-	-	-	-	-	-	-	-	61	-	-	-	1.5	-	-	27	-	-	2	-	-
63	/Tol07/	calcined-clay brick	Brazil	GCWCCB	-	-	850	-	-	-	-	-	-	-	-	-	-	-	-	-	-	-	-	-	-	-	-	-	-	-	-	-	-	-	-	-	61	-	-	-	1.5	-	-	27	-	-	2	-	-
64	/Tol07/	calcined-clay brick	Brazil	GCWCCB	-	-	850	-	-	-	-	-	-	-	-	-	-	-	-	-	-	-	-	-	-	-	-	-	-	-	-	-	-	-	-	-	61	-	-	-	1.5	-	-	27	-	-	2	-	-
65	/Tol07/	calcined-clay brick	Brazil	GCWCCB	-	-	850	-	-	-	-	-	-	-	-	-	-	-	-	-	-	-	-	-	-	-	-	-	-	-	-	-	-	-	-	-	61	-	-	-	1.5	-	-	27	-	-	2	-	-
66	/Tol07/	calcined-clay brick	Brazil	GCWCCB	-	-	850	-	-	-	-	-	-	-	-	-	-	-	-	-	-	-	-	-	-	-	-	-	-	-	-	-	-	-	-	-	61	-	-	-	1.5	-	-	27	-	-	2	-	-
67	/Tol07/	calcined-clay brick	Brazil	GCWCCB	-	-	850	-	-	-	-	-	-	-	-	-	-	-	-	-	-	-	-	-	-	-	-	-	-	-	-	-	-	-	-	-	61	-	-	-	1.5	-	-	27	-	-	2	-	-
68	/Beu15/	kaolinitc clay	Germany	LCT	muffle furnace	-	720	00:60	-	25	-	-	-	11	30	6	-	-	18	-	5			-	3	-	-	1	-	-	-	-	1	-	-	-	65.7	0	-	-	4.1	5.3	0	18.5	3.3			0.5
69	/Beu15/	kaolinitc clay	Germany	GCT	rotary kiln	-	750	-	-	25	-	-	-	11	30	6	-	-	18	-	5			-	3	-	-	1	-	-	-	-	1	-	-	-	59.3	0	-	-	4.4	3.8	0	18.3	7.9			0.4
70	/Beu15/	kaolinitc clay	Germany	LCT	muffle furnace	-	600	00:60	-	25	-	-	-	11	30	6	-	-	18	-	5			-	3	-	-	1	-	-	-	-	1	-	-	-	-	-	-	-	-	-	-	-	-	-	-	-	-
71	/Beu15/	kaolinitc clay	Germany	GCT	rotary kiln	-	600	-	-	25	-	-	-	11	30	6	-	-	18	-	5			-	3	-	-	1	-	-	-	-	1	-	-	-	-	-	-	-	-	-	-	-	-	-	-	-	-
72	/Beu15/	kaolinitc clay	Germany	LCT	muffle furnace	-	770	00:60	-	25	-	-	-	11	30	6	-	-	18	-	5			-	3	-	-	1	-	-	-	-	1	-	-	-	-	-	-	-	-	-	-	-	-	-	-	-	-
73	/Beu15/	kaolinitc clay	Germany	GCT	rotary kiln	-	800	-	-	25	-	-	-	11	30	6	-	-	18	-	5			-	3	-	-	1	-	-	-	-	1	-	-	-	-	-	-	-	-	-	-	-	-	-	-	-	-
74	/Beu15/	kaolinitc clay	Germany	LCT	muffle furnace	-	820	00:60	-	25	-	-	-	11	30	6	-	-	18	-	5			-	3	-	-	1	-	-	-	-	1	-	-	-	-	-	-	-	-	-	-	-	-	-	-	-	-
75	/Beu15/	kaolinitc clay	Germany	GCT	rotary kiln	-	850	-	-	25	-	-	-	11	30	6	-	-	18	-	5			-	3	-	-	1	-	-	-	-	1	-	-	-	-	-	-	-	-	-	-	-	-	-	-	-	-
76	/Beu15/	kaolinitc clay	Germany	LCT	muffle furnace	-	1000	00:60	-	25	-	-	-	11	30	6	-	-	18	-	5			-	3	-	-	1	-	-	-	-	1	-	-	-	-	-	-	-	-	-	-	-	-	-	-	-	-
77	/Beu15/	kaolinitc clay	Germany	GCT	rotary kiln	-	1000	-	-	25	-	-	-	11	30	6	-	-	18	-	5			-	3	-	-	1	-	-	-	-	1	-	-	-	-	-	-	-	-	-	-	-	-	-	-	-	-
78	/Trü19/	kaolinitc clay	-	K_700_D	pilot rotary kiln	-	700	00:10:00		80	-		-	6	-	-	-	-	5	-	9			-	-	-	-	-	-	-	-	-	-	-	-	-	70	-	-	-	-	-	-	-	-	-	-	-	-
79	/Trü19/	kaolinitc clay	-	K_700_D	pilot rotary kiln	-	700	00:10:00		80	-	-	-	6	-	-	-	-	5	-	9			-	-	-	-	-	-	-	-	-	-	-	-	-	70	-	-	-	-	-	-	-	-	-	-	-	-
80	/Trü19/	Illitic clay	-	I_900_D	pilot rotary kiln	-	900	00:10:00	-	-	-	-	-	45	10	-	-	-	27	-	15			-	-	-	-	-	-	-	-	-	-	-	-	-	39	-	-	-	-	-	-	-	-	-	-	-	-
81	/Trü19/	Illitic clay	-	I_900_D	pilot rotary kiln	-	900	00:10:00	-	-	-	-	-	45	10	-	-	-	27	-	15			-	-	-	-	-	-	-	-	-	-	-	-	-	39	-	-	-	-	-	-	-	-	-	-	-	-
82	/Trü19/	smectitic clay	-	M_900_D	pilot rotary kiln	-	900	00:10:00	-	5	62		-	-	10	-	-	-	14	-	3			-	-	-	-	-	-	-	-	-	-	-	-	-	56	-	-	-	-	-	-	-	-	-	-	-	-
83	/Trü19/	smectitic clay	-	M_900_D	pilot rotary kiln	-	900	00:10:00	-	5	62		-	-	10	-	-	-	14	-	3			-	-	-	-	-	-	-	-	-	-	-	-	-	56	-	-	-	-	-	-	-	-	-	-	-	-
84	/He95/	Illitic clay	USA	Illite	muffle furnace	-	650	01:40:00	-	-	-	-	-	83	-	-	-	-	4	-	12			-	1	-	-	-	-	-	-	-	-	-	-	-	-	-	-	-	-	-	-	-	-	-	-	-	-
85	/He95/	Illitic clay	USA	Illite	muffle furnace	-	790	01:40:00	-	-	-	-	-	83	-	-	-	-	4	-	12			-	1	-	-	-	-	-	-	-	-	-	-	-	-	-	-	-	-	-	-	-	-	-	-	-	-
86	/He95/	Illitic clay	USA	Illite	muffle furnace	-	930	01:40:00	-	-	-	-	-	83	-	-	-	-	4	-	12			-	1	-	-	-	-	-	-	-	-	-	-	-	-	-	-	-	-	-	-	-	-	-	-	-	-
87	/He94/	kaolin	Denmark?	kaolin	muffle furnace	-	550	01:40:00	-	82	-	-	-		12	-	-	-	3.8	-	-	-	2.3	-	-	-	-	-	-	-	-	-	-	-	-	-	-	-	-	-	-	-	-	-	-	-	-	-	-
88	/He94/	kaolin	Denmark?	kaolin	muffle furnace	-	650	01:40:00	-	82	-	-	-		12	-	-	-	3.8	-	-	-	2.3	-	-	-	-	-	-	-	-	-	-	-	-	-	-	-	-	-	-	-	-	-	-	-	-	-	-
89	/He94/	kaolin	Denmark?	kaolin	muffle furnace	-	800	01:40:00	-	82	-	-	-		12	-	-	-	3.8	-	-	-	2.3	-	-	-	-	-	-	-	-	-	-	-	-	-	-	-	-	-	-	-	-	-	-	-	-	-	-
90	/He94/	kaolin	Denmark?	kaolin	muffle furnace	-	950	01:40:00	-	82	-	-	-		12	-	-	-	3.8	-	-	-	2.3	-	-	-	-	-	-	-	-	-	-	-	-	-	-	-	-	-	-	-	-	-	-	-	-	-	-
91	/Bal21/	kaolinitic-illitic clay	Russian Federation	Nikitsky	-	-	200	1900-01-08	-	39.8	-	-	-	23.1	-	-	-	-	19.8	-	14.2			-	-	-	-	-	-	-	-	-	3.1	-	-	-	-	-	-	-	-	-	-	-	-	-	-	-	-
92	/Bal21/	kaolinitic-illitic clay	Russian Federation	Nikitsky	-	-	400	02:00:00	-	39.8	-	-	-	23.1	-	-	-	-	19.8	-	14.2			-	-	-	-	-	-	-	-	-	3.1	-	-	-	-	-	-	-	-	-	-	-	-	-	-	-	-
93	/Bal21/	kaolinitic-illitic clay	Russian Federation	Nikitsky	-	-	600	02:00:00	-	39.8	-	-	-	23.1	-	-	-	-	19.8	-	14.2			-	-	-	-	-	-	-	-	-	3.1	-	-	-	-	-	-	-	-	-	-	-	-	-	-	-	-
94	/Bal21/	kaolinitic-illitic clay	Russian Federation	Nikitsky	-	-	700	02:00:00	-	39.8	-	-	-	23.1	-	-	-	-	19.8	-	14.2			-	-	-	-	-	-	-	-	-	3.1	-	-	-	-	-	-	-	-	-	-	-	-	-	-	-	-
95	/Bal21/	kaolinitic-illitic clay	Russian Federation	Nikitsky	-	-	800	02:00:00	-	39.8	-	-	-	23.1	-	-	-	-	19.8	-	14.2			-	-	-	-	-	-	-	-	-	3.1	-	-	-	-	-	-	-	-	-	-	-	-	-	-	-	-
96	/Bal21/	kaolinitic-illitic clay	Russian Federation	Nikitsky	-	-	900	02:00:00	-	39.8	-	-	-	23.1	-	-	-	-	19.8	-	14.2			-	-	-	-	-	-	-	-	-	3.1	-	-	-	-	-	-	-	-	-	-	-	-	-	-	-	-
97	/Bal21/	illitic-kaolinitic clay	Russian Federation	Staroshaigovsky	-	-	200	02:00:00	-	18	-	-	-	23.2	-	-	-	-	46.9	-	11.9			-	-	-	-	-	-	-	-	-	-	-	-	-	-	-	-	-	-	-	-	-	-	-	-	-	-
98	/Bal21/	illitic-kaolinitic clay	Russian Federation	Staroshaigovsky	-	-	400	02:00:00	-	18	-	-	-	23.2	-	-	-	-	46.9	-	11.9			-	-	-	-	-	-	-	-	-	-	-	-	-	-	-	-	-	-	-	-	-	-	-	-	-	-
99	/Bal21/	illitic-kaolinitic clay	Russian Federation	Staroshaigovsky	-	-	600	02:00:00	-	18	-	-	-	23.2	-	-	-	-	46.9	-	11.9			-	-	-	-	-	-	-	-	-	-	-	-	-	-	-	-	-	-	-	-	-	-	-	-	-	-
100	/Bal21/	illitic-kaolinitic clay	Russian Federation	Staroshaigovsky	-	-	700	02:00:00	-	18	-	-	-	23.2	-	-	-	-	46.9	-	11.9			-	-	-	-	-	-	-	-	-	-	-	-	-	-	-	-	-	-	-	-	-	-	-	-	-	-
101	/Bal21/	illitic-kaolinitic clay	Russian Federation	Staroshaigovsky	-	-	800	02:00:00	-	18	-	-	-	23.2	-	-	-	-	46.9	-	11.9			-	-	-	-	-	-	-	-	-	-	-	-	-	-	-	-	-	-	-	-	-	-	-	-	-	-
102	/Bal21/	illitic-kaolinitic clay	Russian Federation	Staroshaigovsky	-	-	900	02:00:00	-	18	-	-	-	23.2	-	-	-	-	46.9	-	11.9			-	-	-	-	-	-	-	-	-	-	-	-	-	-	-	-	-	-	-	-	-	-	-	-	-	-
103	/Dan19/	kaolinitic clay	-	Clay A	pilot scale rotary kiln	-	800	00:45:00	-	47	-	-	-	-	2	-	-	-	18	-	-	-	34	-	-	-	-	-	-	-	-	-	-	-	-	-	-	-	-	-	-	-	-	-	-	-	-	-	-
104	/Dan19/	kaolinitic clay	-	Clay A	pilot scale rotary kiln	-	800	00:45:00	-	47	-	-	-	-	2	-	-	-	18	-	-	-	34	-	-	-	-	-	-	-	-	-	-	-	-	-	-	-	-	-	-	-	-	-	-	-	-	-	-
105	/Dan19/	kaolinitic clay	-	Clay A	pilot scale rotary kiln	-	800	00:45:00	-	47	-	-	-	-	2	-	-	-	18	-	-	-	34	-	-	-	-	-	-	-	-	-	-	-	-	-	-	-	-	-	-	-	-	-	-	-	-	-	-
106	/Dan19/	smectitic marl	-	Clay B	pilot scale rotary kiln	-	800	00:45:00	-	8	-	54	-	4	-	-	-	-	4	-	-	-	-	-	25		3	1	-	-	-	-	-	-	-	-	-	-	-	-	-	-	-	-	-	-	-	-	-
107	/Dan19/	smectitic marl	-	Clay B	pilot scale rotary kiln	-	800	00:45:00	-	8	-	54	-	4	-	-	-	-	4	-	-	-	-	-	25		3	1	-	-	-	-	-	-	-	-	-	-	-	-	-	-	-	-	-	-	-	-	-
108	/Dan19/	smectitic marl	-	Clay B	pilot scale rotary kiln	-	800	00:45:00	-	8	-	54	-	4	-	-	-	-	4	-	-	-	-	-	25		3	1	-	-	-	-	-	-	-	-	-	-	-	-	-	-	-	-	-	-	-	-	-
109	/Dan18/	kaolinitic clay	-	Clay A	pilot scale rotary kiln	-	700	00:45:00	-	47	-	-	-	-	2	-	-	-	18	-	-	-	34	-	-	-	-	-	-	-	-	-	-	-	-	-	-	-	-	-	-	-	-	-	-	-	-	-	-
110	/Dan18/	kaolinitic clay	-	Clay A	pilot scale rotary kiln	-	725	00:45:00	-	47	-	-	-	-	2	-	-	-	18	-	-	-	34	-	-	-	-	-	-	-	-	-	-	-	-	-	-	-	-	-	-	-	-	-	-	-	-	-	-
111	/Dan18/	kaolinitic clay	-	Clay A	pilot scale rotary kiln	-	750	00:45:00	-	47	-	-	-	-	2	-	-	-	18	-	-	-	34	-	-	-	-	-	-	-	-	-	-	-	-	-	-	-	-	-	-	-	-	-	-	-	-	-	-
112	/Dan18/	kaolinitic clay	-	Clay A	pilot scale rotary kiln	-	775	00:45:00	-	47	-	-	-	-	2	-	-	-	18	-	-	-	34	-	-	-	-	-	-	-	-	-	-	-	-	-	-	-	-	-	-	-	-	-	-	-	-	-	-
113	/Dan18/	kaolinitic clay	-	Clay A	pilot scale rotary kiln	-	800	00:45:00	-	47	-	-	-	-	2	-	-	-	18	-	-	-	34	-	-	-	-	-	-	-	-	-	-	-	-	-	-	-	-	-	-	-	-	-	-	-	-	-	-
114	/Dan18/	smectitic marl	-	Clay B	pilot scale rotary kiln	-	700	00:45:00	-	8	-	54	-	4	-	-	-	-	4	-	-	-	-	-	25		3	1	-	-	-	-	-	-	-	-	-	-	-	-	-	-	-	-	-	-	-	-	-
115	/Dan18/	smectitic marl	-	Clay B	pilot scale rotary kiln	-	750	00:45:00	-	8	-	54	-	4	-	-	-	-	4	-	-	-	-	-	25		3	1	-	-	-	-	-	-	-	-	-	-	-	-	-	-	-	-	-	-	-	-	-
116	/Dan18/	smectitic marl	-	Clay B	pilot scale rotary kiln	-	800	00:45:00	-	8	-	54	-	4	-	-	-	-	4	-	-	-	-	-	25		3	1	-	-	-	-	-	-	-	-	-	-	-	-	-	-	-	-	-	-	-	-	-
117	/Dan18/	smectitic marl	-	Clay B	pilot scale rotary kiln	-	850	00:45:00	-	8	-	54	-	4	-	-	-	-	4	-	-	-	-	-	25		3	1	-	-	-	-	-	-	-	-	-	-	-	-	-	-	-	-	-	-	-	-	-
118	/Dan18/	smectitic marl	-	Clay B	pilot scale rotary kiln	-	900	00:45:00	-	8	-	54	-	4	-	-	-	-	4	-	-	-	-	-	25		3	1	-	-	-	-	-	-	-	-	-	-	-	-	-	-	-	-	-	-	-	-	-
119	/Dan18/	smectitic marl	-	Clay B	pilot scale rotary kiln	-	950	00:45:00	-	8	-	54	-	4	-	-	-	-	4	-	-	-	-	-	25		3	1	-	-	-	-	-	-	-	-	-	-	-	-	-	-	-	-	-	-	-	-	-
120	/Dan18/	smectitic marl	-	Clay B	pilot scale rotary kiln	-	1000	00:45:00	-	8	-	54	-	4	-	-	-	-	4	-	-	-	-	-	25		3	1	-	-	-	-	-	-	-	-	-	-	-	-	-	-	-	-	-	-	-	-	-
121	/Mer20/	illitic shale	-	MI1	-	-	950	-	-	-	-	-	-	-	-	-	-	-	-	-	-	-	-	-	-	-	-	-	-	-	-	-	-	-	-	-	56	-	-	-	4	-	-	35	-	-	-	-	-
122	/Mer20/	illitic shale	-	MI1	-	-	950	-	-	-	-	-	-	-	-	-	-	-	-	-	-	-	-	-	-	-	-	-	-	-	-	-	-	-	-	-	56	-	-	-	4	-	-	35	-	-	-	-	-
123	/Mer20/	illitic shale	-	MI1	-	-	950	-	-	-	-	-	-	-	-	-	-	-	-	-	-	-	-	-	-	-	-	-	-	-	-	-	-	-	-	-	56	-	-	-	4	-	-	35	-	-	-	-	-
124	/Mer20/	illitic shale	-	MI2	-	-	950	-	-	-	-	-	-	-	-	-	-	-	-	-	-	-	-	-	-	-	-	-	-	-	-	-	-	-	-	-	49	-	-	-	-	-	-	31	18			-	-
125	/Mer20/	illitic shale	-	MI2	-	-	950	-	-	-	-	-	-	-	-	-	-	-	-	-	-	-	-	-	-	-	-	-	-	-	-	-	-	-	-	-	49	-	-	-	-	-	-	31	18			-	-
126	/Mer20/	illitic shale	-	MI2	-	-	950	-	-	-	-	-	-	-	-	-	-	-	-	-	-	-	-	-	-	-	-	-	-	-	-	-	-	-	-	-	49	-	-	-	-	-	-	31	18			-	-
127	/Jaf20/	smectitic-kaolinitic clay	-	CC	-	-	750	03:00:00	4.7	26.3	52.6		2.7	-	7.2	-	-	-	-	-	-	-	-	-	-	-	-	-	-	-	3.4	3.1	-	-	-	-	42.4	-	-	-		3	-	52.4	-	-	-	-	-
128	/Msi20/	illitic clay	Germany	I1	laboratory-scale rotary	-	850	-	-	16.7	-	-	-	16.3	-	-	-	-	62.5	-	-	-	-	-	-	-	-	-	-	-	-	-	-	-	-	-	-	-	-	-	-	-	-	-	-	-	-	-	-
129	/Msi20/	illitic clay	Germany	I1	laboratory-scale rotary	-	900	-	-	16.7	-	-	-	16.3	-	-	-	-	62.5	-	-	-	-	-	-	-	-	-	-	-	-	-	-	-	-	-	-	-	-	-	-	-	-	-	-	-	-	-	-
130	/Msi20/	illitic clay	Germany	I2	laboratory-scale rotary	-	850	-	-	18	5.2		-	31.1	-	-	-	-	36.3	-	-	-	-	-	-	-	-	-	-	-	-	-	-	-	-	-	-	-	-	-	-	-	-	-	-	-	-	-	-
131	/Msi20/	illitic clay	Germany	I2	laboratory-scale rotary	-	900	-	-	18	5.2		-	31.1	-	-	-	-	36.3	-	-	-	-	-	-	-	-	-	-	-	-	-	-	-	-	-	-	-	-	-	-	-	-	-	-	-	-	-	-
132	/Msi20/	kaolinitic clay	Germany	K1	laboratory-scale rotary	-	650	-	-	54.8	-	-	-	1.1	-	-	-	-	40.4	-	-	-	-	-	-	-	-	-	-	-	-	-	-	-	-	-	-	-	-	-	-	-	-	-	-	-	-	-	-
133	/Msi20/	kaolinitic clay	Germany	K1	laboratory-scale rotary	-	900	-	-	54.8	-	-	-	1.1	-	-	-	-	40.4	-	-	-	-	-	-	-	-	-	-	-	-	-	-	-	-	-	-	-	-	-	-	-	-	-	-	-	-	-	-
134	/Msi20/	illitic-kaolinitic clay	Germany	B1	laboratory-scale rotary	-	650	-	-	35.75	-	-	-	8.7	-	-	-	-	51.45	-	-	-	-	-	-	-	-	-	-	-	-	-	-	-	-	-	-	-	-	-	-	-	-	-	-	-	-	-	-
135	/Msi20/	illitic-kaolinitic clay	Germany	B1	laboratory-scale rotary	-	900	-	-	35.75	-	-	-	8.7	-	-	-	-	51.45	-	-	-	-	-	-	-	-	-	-	-	-	-	-	-	-	-	-	-	-	-	-	-	-	-	-	-	-	-	-
136	/Dan20/	smectitic clay	Germany?	Sm	pilot scale rotary kiln	-	800	00:45:00	-	1	42.5		-	5.6	-	1	-	-	32.6	-	-		8.2	-	4.6	-	4.4	-	-	-	-	-	-	-	-	-	-	-	-	-	-	-	-	-	-	-	-	-	-
137	/Dan20/	smectitic clay	Germany?	Sm-Ca	pilot scale rotary kiln	-	800	00:45:00	-	8.4	53.5		-	4.4	-	-	-	-	4.3	-	-		-	-	24.7	-	3.1	1.3	-	-	-	-	-	-	-	-	-	-	-	-	-	-	-	-	-	-	-	-	-
138	/Dan20/	illitic clay	Germany?	Ill	pilot scale rotary kiln	-	800	00:45:00	-	5.2	0.2		-	39.6	-	9.1	-	-	17.1	-	6.5		4.8	-	2.8	-	-	-	-	14.7	-	-	-	-	-	-	-	-	-	-	-	-	-	-	-	-	-	-	-
139	/Dan20/	illitic clay	Germany?	Ill-Ca	pilot scale rotary kiln	-	800	00:45:00	-	8	8		-	9.1	-	-	-	-	22	-	4		4	-	15	4	-	-	-	-	8	-	-	-	-	-	-	-	-	-	-	-	-	-	-	-	-	-	-
140	/Ira19a/	illitic shale	Argentina	LUT	laboratory furnace	-	900	-	-	-	-	-	-	45	-	14	-	-	30	-	11	-	-	-	0.6	-	-	-	-	-	-	-	-	-	-	-	31	-	-	-	24	-	-	30	13		< 1	-	-
141	/Ira19a/	illitic shale	Argentina	LUT	laboratory furnace	-	1000	-	-	-	-	-	-	45	-	14	-	-	30	-	11	-	-	-	0.6	-	-	-	-	-	-	-	-	-	-	-	53	-	-	-	-	-	-	30	14		< 1	-	-
142	/Ira19a/	illitic shale	Argentina	LUT	laboratory furnace	-	1100	-	-	-	-	-	-	45	-	14	-	-	30	-	11	-	-	-	0.6	-	-	-	-	-	-	-	-	-	-	-	59	-	-	-	-	-	-	30	-		-	-	-
143	/Ira19a/	illitic shale	Argentina	HET	laboratory furnace	-	900	-	-	-	2		-	44	-	5	-	-	33	-	15	-	-	-	0.7	-	-	-	-	-	-	-	-	-	-	-	13	-	-	-	34	-	-	33	19		< 1	-	-
144	/Ira19a/	illitic shale	Argentina	HET	laboratory furnace	-	1000	-	-	-	2		-	44	-	5	-	-	33	-	15	-	-	-	0.7	-	-	-	-	-	-	-	-	-	-	-	44	-	-	-	-	-	-	33	19		-	-	-
145	/Ira19a/	illitic shale	Argentina	HET	laboratory furnace	-	1100	-	-	-	2		-	44	-	5	-	-	33	-	15	-	-	-	0.7	-	-	-	-	-	-	-	-	-	-	-	52	-	-	-	-	-	-	33	2		-	-	-
146	/Ira19b/	illitic shale	Argentina	IC01	laboratory furnace	-	950	-	-	-	1.7	-	-	49.8	-	6.5	-	-	25.7	-	14.8				0.6	-	-	-	-	-	-	-	-	-	-	-	-	-	-	-	-	-	-	-	-	-	-	-	-
147	/Ira19b/	illitic shale	Argentina	IC02	laboratory furnace	-	950	-	-	-	-	-	-	39.9	-	9.1	-	-	35.3	-	15.1				-	-	-	-	-	-	-	-	-	-	-	-	-	-	-	-	-	-	-	-	-	-	-	-	-
148	/Ira19b/	illitic shale	Argentina	IC03	laboratory furnace	-	950	-	-	3	0.8		-	38.8	-	-	-	-	45.8	-	11.5				-	-	-	-	-	-	-	-	-	-	-	-	-	-	-	-	-	-	-	-	-	-	-	-	-
149	/Ira19b/	illitic shale	Argentina	IC04	laboratory furnace	-	950	-	-	5.3	-		-	75	-	-	-	-	19.7	-	-				-	-	-	-	-	-	-	-	-	-	-	-	-	-	-	-	-	-	-	-	-	-	-	-	-
150	/Ira19b/	illitic shale	Argentina	IC05	laboratory furnace	-	950	-	-	-	-		-	75.4	-	-	-	-	23	-	-				-	-	-	-	-	1.6	-	-	-	-	-	-	-	-	-	-	-	-	-	-	-	-	-	-	-
151	/Ira19b/	illitic shale	Argentina	IC06	laboratory furnace	-	950	-	-	9.1	-		-	61.8	-	-	-	-	28.7	-	0.4				-	-	-	-	-	-	-	-	-	-	-	-	-	-	-	-	-	-	-	-	-	-	-	-	-
152	/Ira19b/	kaolinitic shale	Argentina	KC01	laboratory furnace	-	600	-	-	39.4	-		-	6.1	-	-	-	-	54.5	-	-				-	-	-	-	-	-	-	-	-	-	-	-	-	-	-	-	-	-	-	-	-	-	-	-	-
153	/Ira19b/	kaolinitic shale	Argentina	KC02	laboratory furnace	-	600	-	-	85.1	-		-	11	-	-	-	-	4.1	-	-				-	-	-	-	-	-	-	-	-	-	-	-	-	-	-	-	-	-	-	-	-	-	-	-	-
154	/Moh16/	illitic marl	Algeria	CM 500°C-5h	laboratory furnace	-	500	05:00	-	-	-	-	-	20		9	-	-	7	-	-	-	-	-	30.5	16.5	-	-	-	-	-	-	2	-	-	-	-	-	-	-	-	-	-	-	-	-	-	-	-
155	/Moh16/	illitic marl	Algeria	CM 600°C-2h	laboratory furnace	-	600	02:00	-	-	-	-	-	20		9	-	-	7	-	-	-	-	-	30.5	16.5	-	-	-	-	-	-	2	-	-	-	-	-	-	-	-	-	-	-	-	-	-	-	-
156	/Moh16/	illitic marl	Algeria	CM 600°C-3h	laboratory furnace	-	600	03:00	-	-	-	-	-	20		9	-	-	7	-	-	-	-	-	30.5	16.5	-	-	-	-	-	-	2	-	-	-	-	-	-	-	-	-	-	-	-	-	-	-	-
157	/Moh16/	illitic marl	Algeria	CM 600°C-5h	laboratory furnace	-	600	05:00	-	-	-	-	-	20		9	-	-	7	-	-	-	-	-	30.5	16.5	-	-	-	-	-	-	2	-	-	-	-	-	-	-	-	-	-	-	-	-	-	-	-
158	/Moh16/	illitic marl	Algeria	CM 700°C-2h	laboratory furnace	-	700	02:00	-	-	-	-	-	20		9	-	-	7	-	-	-	-	-	30.5	16.5	-	-	-	-	-	-	2	-	-	-	-	-	-	-	-	-	-	-	-	-	-	-	-
159	/Moh16/	illitic marl	Algeria	CM 700°C-3h	laboratory furnace	-	700	03:00	-	-	-	-	-	20		9	-	-	7	-	-	-	-	-	30.5	16.5	-	-	-	-	-	-	2	-	-	-	-	-	-	-	-	-	-	-	-	-	-	-	-
160	/Moh16/	illitic marl	Algeria	CM 700°C-5h	laboratory furnace	-	700	05:00	-	-	-	-	-	20		9	-	-	7	-	-	-	-	-	30.5	16.5	-	-	-	-	-	-	2	-	-	-	-	-	-	-	-	-	-	-	-	-	-	-	-
161	/Moh16/	illitic marl	Algeria	CM 800°C-2h	laboratory furnace	-	800	02:00	-	-	-	-	-	20		9	-	-	7	-	-	-	-	-	30.5	16.5	-	-	-	-	-	-	2	-	-	-	-	-	-	-	-	-	-	-	-	-	-	-	-
162	/Moh16/	illitic marl	Algeria	CM 800°C-3h	laboratory furnace	-	800	03:00	-	-	-	-	-	20		9	-	-	7	-	-	-	-	-	30.5	16.5	-	-	-	-	-	-	2	-	-	-	-	-	-	-	-	-	-	-	-	-	-	-	-
163	/Moh16/	illitic marl	Algeria	CM 800°C-5h	laboratory furnace	-	800	05:00	-	-	-	-	-	20		9	-	-	7	-	-	-	-	-	30.5	16.5	-	-	-	-	-	-	2	-	-	-	-	-	-	-	-	-	-	-	-	-	-	-	-
164	/Moh16/	illitic marl	Algeria	CM 1000°C-2h	laboratory furnace	-	1000	02:00	-	-	-	-	-	20		9	-	-	7	-	-	-	-	-	30.5	16.5	-	-	-	-	-	-	2	-	-	-	-	-	-	-	-	-	-	-	-	-	-	-	-
165	/Tay15/	kaolin	USA	K	laboratory furnace	-	650	01:00	7.8	92.1	-	-	-	-	0.7	-	-	-	4.1			-	-	-	-	-	-	-	-	-	-	-	-	-	-	-	91.4	8.6	-	-	-	0.7	-	2.9		-	-	-	-
166	/Tay15/	kaolinite-calcium bentonite	USA	KCaB	laboratory furnace	-	930	01:00	4.7	24.2	-	12.7	-	-	12.6	-	-	-	45.8			-	-	-	-	-	-	-	-	-	-	-	-	-	-	-	38.1	2.6	-	1.8	-	12.5	-	45		-	-	-	-
167	/Tay15/	kaolinite-sodium bentonite	USA	KNaB	laboratory furnace	-	830	01:00	0	35.1	40.3	-	-	-	12.7	-	-	-	11.9			-	-	-	-	-	-	-	-	-	-	-	-	-	-	-	47.7	6.7	-	21.3	-	12.4	-	11.9		-	-	-	-
168	/Tir14/	kaolinitic clay	Argentina	MK1	laboratory furnace	< 4 mm	700	-	-	94	-	-	-	-	-	-	-	-	2	-	-	-	-	-	-	-	-	-	-	-	-	-	-	-	-	-	-	-	-	-	-	-	-	-	-	-	-	-	-
169	/Tir14/	kaolinitic clay	Argentina	MK2	laboratory furnace	< 4 mm	700	-	-	76	-	-	-	3	-	-	-	-	15	-	-	-	-	-	-	-	-	-	-	-	-	-	-	-	-	-	-	-	-	-	-	-	-	-	-	-	-	-	-
170	/Tir14/	kaolinitic clay	Argentina	MK3	laboratory furnace	< 4 mm	700	-	-	65	-	-	-	3	-	-	-	-	28	-	-	-	-	-	-	-	-	-	-	-	-	-	-	-	-	-	-	-	-	-	-	-	-	-	-	-	-	-	-
171	/Tir14/	kaolinitic clay	Argentina	MK4	laboratory furnace	< 4 mm	700	-	-	48	-	-	-	6	-	-	-	-	41	-	-	-	-	-	-	-	-	-	-	-	-	-	-	-	-	-	-	-	-	-	-	-	-	-	-	-	-	-	-
172	/Tir14/	kaolinitic-illitic clay	Argentina	MK5	laboratory furnace	< 4 mm	700	-	-	16	-	-	-	16	-	-	-	-	55	-	13			-	-	-	-	-	-	-	-	-	-	-	-	-	-	-	-	-	-	-	-	-	-	-	-	-	-
173	/Aka15/	kaolinitic clay	Lybia	Sebha (A)	-	6.35-12.7 mm	800	02:00	-	95	-	-	-	-	-	-	-	-	5	-	-	-	-	-	-	-	-	-	-	-	-	-	-	-	-	-	-	-	-	-	-	-	-	-	-	-	-	-	-
174	/Aka15/	kaolinitic clay	Lybia	Sebha (A)	-	6.35-12.7 mm	800	02:00	-	95	-	-	-	-	-	-	-	-	5	-	-	-	-	-	-	-	-	-	-	-	-	-	-	-	-	-	-	-	-	-	-	-	-	-	-	-	-	-	-
175	/Aka15/	kaolinitic clay	Lybia	Sebha (A)	-	6.35-12.7 mm	800	02:00	-	95	-	-	-	-	-	-	-	-	5	-	-	-	-	-	-	-	-	-	-	-	-	-	-	-	-	-	-	-	-	-	-	-	-	-	-	-	-	-	-
176	/Aka15/	kaolinitic clay	Lybia	Temenhint (B)	-	6.35-12.7 mm	800	02:00	-	50	-	-	-	-	-	-	-	-	50	-	-	-	-	-	-	-	-	-	-	-	-	-	-	-	-	-	-	-	-	-	-	-	-	-	-	-	-	-	-
177	/Aka15/	kaolinitic clay	Lybia	Temenhint (B)	-	6.35-12.7 mm	800	02:00	-	50	-	-	-	-	-	-	-	-	50	-	-	-	-	-	-	-	-	-	-	-	-	-	-	-	-	-	-	-	-	-	-	-	-	-	-	-	-	-	-
178	/Aka15/	kaolinitic clay	Lybia	Temenhint (B)	-	6.35-12.7 mm	800	02:00	-	50	-	-	-	-	-	-	-	-	50	-	-	-	-	-	-	-	-	-	-	-	-	-	-	-	-	-	-	-	-	-	-	-	-	-	-	-	-	-	-
179	/Aka15/	kaolinitic clay	Lybia	Alafya (′C)	-	6.35-12.7 mm	800	02:00	-	54	-	-	-	-	-	-	-	-	46	-	-	-	-	-	-	-	-	-	-	-	-	-	-	-	-	-	-	-	-	-	-	-	-	-	-	-	-	-	-
180	/Aka15/	kaolinitic clay	Lybia	Alafya (′C)	-	6.35-12.7 mm	800	02:00	-	54	-	-	-	-	-	-	-	-	46	-	-	-	-	-	-	-	-	-	-	-	-	-	-	-	-	-	-	-	-	-	-	-	-	-	-	-	-	-	-
181	/Aka15/	kaolinitic clay	Lybia	Alafya (′C)	-	6.35-12.7 mm	800	02:00	-	54	-	-	-	-	-	-	-	-	46	-	-	-	-	-	-	-	-	-	-	-	-	-	-	-	-	-	-	-	-	-	-	-	-	-	-	-	-	-	-
182	/Aka15/	kaolinitic clay	Lybia	Agar (D)	-	6.35-12.7 mm	800	02:00	-	90	-	-	-	5	-	-	-	-	5	-	-	-	-	-	-	-	-	-	-	-	-	-	-	-	-	-	-	-	-	-	-	-	-	-	-	-	-	-	-
183	/Aka15/	kaolinitic clay	Lybia	Agar (D)	-	6.35-12.7 mm	800	02:00	-	90	-	-	-	5	-	-	-	-	5	-	-	-	-	-	-	-	-	-	-	-	-	-	-	-	-	-	-	-	-	-	-	-	-	-	-	-	-	-	-
184	/Aka15/	kaolinitic clay	Lybia	Agar (D)	-	6.35-12.7 mm	800	02:00	-	90	-	-	-	5	-	-	-	-	5	-	-	-	-	-	-	-	-	-	-	-	-	-	-	-	-	-	-	-	-	-	-	-	-	-	-	-	-	-	-
185	/Aka15/	kaolinitic clay	Lybia	Tarout (E)	-	6.35-12.7 mm	800	02:00	-	30	-	-	-	-	-	-	-	-	70	-	-	-	-	-	-	-	-	-	-	-	-	-	-	-	-	-	-	-	-	-	-	-	-	-	-	-	-	-	-
186	/Aka15/	kaolinitic clay	Lybia	Tarout (E)	-	6.35-12.7 mm	800	02:00	-	30	-	-	-	-	-	-	-	-	70	-	-	-	-	-	-	-	-	-	-	-	-	-	-	-	-	-	-	-	-	-	-	-	-	-	-	-	-	-	-
187	/Aka15/	kaolinitic clay	Lybia	Tarout (E)	-	6.35-12.7 mm	800	02:00	-	30	-	-	-	-	-	-	-	-	70	-	-	-	-	-	-	-	-	-	-	-	-	-	-	-	-	-	-	-	-	-	-	-	-	-	-	-	-	-	-
188	/Tre18/	kaolinitic clay	Argentina	PK1	-	-	600	-	-	40	-	-	-	27	-	-	25	-	-	-	8			-	-	-	-	-	-	-	-	-	-	-	-	-	-	-	-	-	-	-	-	-	-	-	-	-	-
189	/Tre18/	kaolinitic clay	Argentina	PK2	-	-	600	-	-	47	-	-	-	33	-	-	13	-	-	-	7			-	-	-	-	-	-	-	-	-	-	-	-	-	-	-	-	-	-	-	-	-	-	-	-	-	-
190	/Hue18/	illitic-kaolinitic	-	PL1	pilot scale rotary kiln	-	600	-	0.1	15.5	-	-	-	22.7	-	-	-	-	60.1	-	-	-	0	-	-	-	-	-	-	1.7	-	-	-	-	-	-	-	-	-	-	-	-	-	-	-	-	-	-	-
191	/Hue18/	illitic-kaolinitic	-	PL1	pilot scale rotary kiln	-	650	-	0.1	15.5	-	-	-	22.7	-	-	-	-	60.1	-	-	-	0	-	-	-	-	-	-	1.7	-	-	-	-	-	-	9.2	3	-	-	18.9	-	-	63.6	-	-	0	-	-
192	/Hue18/	illitic-kaolinitic	-	PL1	pilot scale rotary kiln	-	700	-	0.1	15.5	-	-	-	22.7	-	-	-	-	60.1	-	-	-	0	-	-	-	-	-	-	1.7	-	-	-	-	-	-	-	-	-	-	-	-	-	-	-	-	-	-	-
193	/Hue18/	kaolinitic-illitic clay	-	PL2	pilot scale rotary kiln	-	600	-	0.6	25.5	-	-	-	14.9	-	-	-	-	52.6	-	-	-	4.6	-	-	-	-	-	-	1.8	-	-	-	-	-	-	-	-	-	-	-	-	-	-	-	-	-	-	-
194	/Hue18/	kaolinitic-illitic clay	-	PL2	pilot scale rotary kiln	-	650	-	0.6	25.5	-	-	-	14.9	-	-	-	-	52.6	-	-	-	4.6	-	-	-	-	-	-	-	-	-	-	-	-	-	19.2	5.3	-	-	13	-	-	52.4	-	-	6	-	-
195	/Hue18/	kaolinitic-illitic clay	-	PL2	pilot scale rotary kiln	-	700	-	0.6	25.5	-	-	-	14.9	-	-	-	-	52.6	-	-	-	4.6	-	-	-	-	-	-	-	-	-	-	-	-	-	-	-	-	-	-	-	-	-	-	-	-	-	-
196	/Hue18/	kaolinitic clay	-	PL7	pilot scale rotary kiln	-	600	-	0.1	60.1	-	-	-	5.5	-	-	-	-	30.1	-	-	-	2.5	-	-	-	-	-	-	1.7	-	-	-	-	-	-	-	-	-	-	-	-	-	-	-	-	-	-	-
197	/Hue18/	kaolinitic clay	-	PL7	pilot scale rotary kiln	-	650	-	0.1	60.1	-	-	-	5.5	-	-	-	-	30.1	-	-	-	2.5	-	-	-	-	-	-	-	-	-	-	-	-	-	50.7	3.9	-	-	6.1	-	-	36.1	-	-	1.7	-	-
198	/Hue18/	kaolinitic clay	-	PL7	pilot scale rotary kiln	-	700	-	0.1	60.1	-	-	-	5.5	-	-	-	-	30.1	-	-	-	2.5	-	-	-	-	-	-	-	-	-	-	-	-	-	-	-	-	-	-	-	-	-	-	-	-	-	-
199	/Hue18/	kaolinitic-illitic clay	-	PL1_80_PL7_20	pilot scale rotary kiln	-	600	-	0.1	24.42	-	-	-	19.26	-	-	-	-	54.1	-	-	-	0.5	-	-	-	-	-	-	1.7	-	-	-	-	-	-	-	-	-	-	-	-	-	-	-	-	-	-	-
200	/Hue18/	kaolinitic-illitic clay	-	PL1_80_PL7_20	pilot scale rotary kiln	-	650	-	0.1	24.42	-	-	-	19.26	-	-	-	-	54.1	-	-	-	0.5	-	-	-	-	-	-	1.7	-	-	-	-	-	-	17.5	3.18	-	-	16.34	0	0	58.1	0	0	0.34	0	0
201	/Hue18/	kaolinitic-illitic clay	-	PL1_80_PL7_20	pilot scale rotary kiln	-	700	-	0.1	24.42	-	-	-	19.26	-	-	-	-	54.1	-	-	-	0.5	-	-	-	-	-	-	1.7	-	-	-	-	-	-	-	-	-	-	-	-	-	-	-	-	-	-	-
202	/Hue18/	kaolinitic-illitic clay	-	PL1_60_PL7_40	pilot scale rotary kiln	-	600	-	0.1	33.34	-	-	-	15.82	-	-	-	-	48.1	-	-	-	1	-	-	-	-	-	-	1.7	-	-	-	-	-	-	-	-	-	-	-	-	-	-	-	-	-	-	-
203	/Hue18/	kaolinitic-illitic clay	-	PL1_60_PL7_40	pilot scale rotary kiln	-	650	-	0.1	33.34	-	-	-	15.82	-	-	-	-	48.1	-	-	-	1	-	-	-	-	-	-	1.7	-	-	-	-	-	-	25.8	3.36	-	-	13.78	0	0	52.6	0	0	0.68	0	0
204	/Hue18/	kaolinitic-illitic clay	-	PL1_60_PL7_40	pilot scale rotary kiln	-	700	-	0.1	33.34	-	-	-	15.82	-	-	-	-	48.1	-	-	-	1	-	-	-	-	-	-	1.7	-	-	-	-	-	-	-	-	-	-	-	-	-	-	-	-	-	-	-
205	/Hue18/	kaolinitic-illitic clay	-	PL1_40_PL7_60	pilot scale rotary kiln	-	600	-	0.1	42.26	-	-	-	12.38	-	-	-	-	42.1	-	-	-	1.5	-	-	-	-	-	-	1.7	-	-	-	-	-	-	-	-	-	-	-	-	-	-	-	-	-	-	-
206	/Hue18/	kaolinitic-illitic clay	-	PL1_40_PL7_60	pilot scale rotary kiln	-	650	-	0.1	42.26	-	-	-	12.38	-	-	-	-	42.1	-	-	-	1.5	-	-	-	-	-	-	1.7	-	-	-	-	-	-	34.1	3.54	-	-	11.22	0	0	47.1	0	0	1.02	0	0
207	/Hue18/	kaolinitic-illitic clay	-	PL1_40_PL7_60	pilot scale rotary kiln	-	700	-	0.1	42.26	-	-	-	12.38	-	-	-	-	42.1	-	-	-	1.5	-	-	-	-	-	-	1.7	-	-	-	-	-	-	-	-	-	-	-	-	-	-	-	-	-	-	-
208	/Hue18/	kaolinitic-illitic clay	-	PL1_20_PL7_80	pilot scale rotary kiln	-	600	-	0.1	51.18	-	-	-	8.94	-	-	-	-	36.1	-	-	-	2	-	-	-	-	-	-	1.7	-	-	-	-	-	-	-	-	-	-	-	-	-	-	-	-	-	-	-
209	/Hue18/	kaolinitic-illitic clay	-	PL1_20_PL7_80	pilot scale rotary kiln	-	650	-	0.1	51.18	-	-	-	8.94	-	-	-	-	36.1	-	-	-	2	-	-	-	-	-	-	1.7	-	-	-	-	-	-	42.4	3.72	-	-	8.66	0	0	41.6	0	0	1.36	0	0
210	/Hue18/	kaolinitic-illitic clay	-	PL1_20_PL7_80	pilot scale rotary kiln	-	700	-	0.1	51.18	-	-	-	8.94	-	-	-	-	36.1	-	-	-	2	-	-	-	-	-	-	1.7	-	-	-	-	-	-	-	-	-	-	-	-	-	-	-	-	-	-	-
211	/Hue18/	kaolinitic-illitic clay	-	PL2_80_PL7_20	pilot scale rotary kiln	-	600	-	0.5	32.42	-	-	-	13.02	-	-	-	-	48.1	-	-	-	4.18	-	-	-	-	-	-	1.78	-	-	-	-	-	-	-	-	-	-	-	-	-	-	-	-	-	-	-
212	/Hue18/	kaolinitic-illitic clay	-	PL2_80_PL7_20	pilot scale rotary kiln	-	650	-	0.5	32.42	-	-	-	13.02	-	-	-	-	48.1	-	-	-	4.18	-	-	-	-	-	-	1.78	-	-	-	-	-	-	25.5	5.02	-	-	11.62	0	0	49.14	0	0	5.14	0	0
213	/Hue18/	kaolinitic-illitic clay	-	PL2_80_PL7_20	pilot scale rotary kiln	-	700	-	0.5	32.42	-	-	-	13.02	-	-	-	-	48.1	-	-	-	4.18	-	-	-	-	-	-	1.78	-	-	-	-	-	-	-	-	-	-	-	-	-	-	-	-	-	-	-
214	/Hue18/	kaolinitic-illitic clay	-	PL2_60_PL7_40	pilot scale rotary kiln	-	600	-	0.4	39.34	-	-	-	11.14	-	-	-	-	43.6	-	-	-	3.76	-	-	-	-	-	-	1.76	-	-	-	-	-	-	-	-	-	-	-	-	-	-	-	-	-	-	-
215	/Hue18/	kaolinitic-illitic clay	-	PL2_60_PL7_40	pilot scale rotary kiln	-	650	-	0.4	39.34	-	-	-	11.14	-	-	-	-	43.6	-	-	-	3.76	-	-	-	-	-	-	1.76	-	-	-	-	-	-	31.8	4.74	-	-	10.24	0	0	45.88	0	0	4.28	0	0
216	/Hue18/	kaolinitic-illitic clay	-	PL2_60_PL7_40	pilot scale rotary kiln	-	700	-	0.4	39.34	-	-	-	11.14	-	-	-	-	43.6	-	-	-	3.76	-	-	-	-	-	-	1.76	-	-	-	-	-	-	-	-	-	-	-	-	-	-	-	-	-	-	-
217	/Hue18/	kaolinitic-illitic clay	-	PL2_40_PL7_60	pilot scale rotary kiln	-	600	-	0.3	46.26	-	-	-	9.26	-	-	-	-	39.1	-	-	-	3.34	-	-	-	-	-	-	1.74	-	-	-	-	-	-	-	-	-	-	-	-	-	-	-	-	-	-	-
218	/Hue18/	kaolinitic-illitic clay	-	PL2_40_PL7_60	pilot scale rotary kiln	-	650	-	0.3	46.26	-	-	-	9.26	-	-	-	-	39.1	-	-	-	3.34	-	-	-	-	-	-	1.74	-	-	-	-	-	-	38.1	4.46	-	-	8.86	0	0	42.62	0	0	3.42	0	0
219	/Hue18/	kaolinitic-illitic clay	-	PL2_40_PL7_60	pilot scale rotary kiln	-	700	-	0.3	46.26	-	-	-	9.26	-	-	-	-	39.1	-	-	-	3.34	-	-	-	-	-	-	1.74	-	-	-	-	-	-	-	-	-	-	-	-	-	-	-	-	-	-	-
220	/Hue18/	kaolinitic-illitic clay	-	PL2_20_PL7_80	pilot scale rotary kiln	-	600	-	0.2	53.18	-	-	-	7.38	-	-	-	-	34.6	-	-	-	2.92	-	-	-	-	-	-	1.72	-	-	-	-	-	-	-	-	-	-	-	-	-	-	-	-	-	-	-
221	/Hue18/	kaolinitic-illitic clay	-	PL2_20_PL7_80	pilot scale rotary kiln	-	650	-	0.2	53.18	-	-	-	7.38	-	-	-	-	34.6	-	-	-	2.92	-	-	-	-	-	-	1.72	-	-	-	-	-	-	44.4	4.18	-	-	7.48	0	0	39.36	0	0	2.56	0	0
222	/Hue18/	kaolinitic-illitic clay	-	PL2_20_PL7_80	pilot scale rotary kiln	-	700	-	0.2	53.18	-	-	-	7.38	-	-	-	-	34.6	-	-	-	2.92	-	-	-	-	-	-	1.72	-	-	-	-	-	-	-	-	-	-	-	-	-	-	-	-	-	-	-
223	/Lem18/	illitic clay	Argentina	L	-	-	900	-	-	-	-	-	-	45	-	15	-	-	30	-	10	-	-	-	< 0.6	-	-	-	-	-	-	-	-	-	-	-	-	-	-	-	-	-	-	-	-	-	-	-	-
224	/Lem18/	illitic clay	Argentina	L	-	-	1000	-	-	-	-	-	-	45	-	15	-	-	30	-	10	-	-	-	< 0.6	-	-	-	-	-	-	-	-	-	-	-	-	-	-	-	-	-	-	-	-	-	-	-	-
225	/Lem18/	illitic clay	Argentina	L	-	-	1100	-	-	-	-	-	-	45	-	15	-	-	30	-	10	-	-	-	< 0.6	-	-	-	-	-	-	-	-	-	-	-	-	-	-	-	-	-	-	-	-	-	-	-	-
226	/Fri10/	kaolinitic paper sludge	-	CPS	-	-	650	02:00	-	25	-	-	-	-	-	12	-	6	-	-	-	-	-	-	57	-	-	-	-	-	-	-	-	-	-	-	-	-	-	-	-	-	-	-	-	-	-	-	-
227	/Gon09/	calcined-clay brick	-	GB	-	-	850	-	-	-	-	-	-	-	-	-	-	-	-	-	-	-	-	-	-	-	-	-	-	-	-	-	-	-	-	-	61	-	-	-	1.5	-	-	27	-	-	2	-	-
228	/Gon09/	calcined-clay brick	-	GB	-	-	850	-	-	-	-	-	-	-	-	-	-	-	-	-	-	-	-	-	-	-	-	-	-	-	-	-	-	-	-	-	61	-	-	-	1.5	-	-	27	-	-	2	-	-
229	/Gon09/	calcined-clay brick	-	GB	-	-	850	-	-	-	-	-	-	-	-	-	-	-	-	-	-	-	-	-	-	-	-	-	-	-	-	-	-	-	-	-	61	-	-	-	1.5	-	-	27	-	-	2	-	-
230	/Gon09/	calcined-clay brick	-	GB	-	-	850	-	-	-	-	-	-	-	-	-	-	-	-	-	-	-	-	-	-	-	-	-	-	-	-	-	-	-	-	-	61	-	-	-	1.5	-	-	27	-	-	2	-	-
231	/Gon09/	metakaolin	-	Mk1	-	-	-	-	-	-	-	-	-	-	-	-	-	-	-	-	-	-	-	-	-	-	-	-	-	-	-	-	-	-	-	-	87	7	-	-	-	3	-	3	-	-	-	-	-
232	/Gon09/	metakaolin	-	Mk1	-	-	-	-	-	-	-	-	-	-	-	-	-	-	-	-	-	-	-	-	-	-	-	-	-	-	-	-	-	-	-	-	87	7	-	-	-	3	-	3	-	-	-	-	-
233	/Gon09/	metakaolin	-	Mk1	-	-	-	-	-	-	-	-	-	-	-	-	-	-	-	-	-	-	-	-	-	-	-	-	-	-	-	-	-	-	-	-	87	7	-	-	-	3	-	3	-	-	-	-	-
234	/Gon09/	metakaolin	-	Mk1	-	-	-	-	-	-	-	-	-	-	-	-	-	-	-	-	-	-	-	-	-	-	-	-	-	-	-	-	-	-	-	-	87	7	-	-	-	3	-	3	-	-	-	-	-
235	/Gon09/	metakaolin	-	Mk2	-	-	550	02:00	-	-	-	-	-	-	-	-	-	-	-	-	-	-	-	-	-	-	-	-	-	-	-	-	-	-	-	-	96	-	-	-	-	-	-	4	-	-	-	-	-
236	/Gon09/	metakaolin	-	Mk2	-	-	550	02:00	-	-	-	-	-	-	-	-	-	-	-	-	-	-	-	-	-	-	-	-	-	-	-	-	-	-	-	-	96	-	-	-	-	-	-	4	-	-	-	-	-
237	/Gon09/	metakaolin	-	Mk2	-	-	550	02:00	-	-	-	-	-	-	-	-	-	-	-	-	-	-	-	-	-	-	-	-	-	-	-	-	-	-	-	-	96	-	-	-	-	-	-	4	-	-	-	-	-
238	/Gon09/	metakaolin	-	Mk2	-	-	550	02:00	-	-	-	-	-	-	-	-	-	-	-	-	-	-	-	-	-	-	-	-	-	-	-	-	-	-	-	-	96	-	-	-	-	-	-	4	-	-	-	-	-
239	/Gut08/	metakaolin	Colombia	MKN	-	-	600	-	-	-	-	-	-	-	-	-	-	-	-	-	-	-	-	-	-	-	-	-	-	-	-	-	-	-	-	-	-	-	-	-	-	-	-	-	-	-	-	-	-
240	/Gut08/	metakaolin	Colombia	MKN	-	-	800	-	-	97	-	-	-	-	-	-	-	-	-	-	-	-	-	-	-	-	-	-	-	-	-	-	-	-	-	-	-	-	-	-	-	-	-	-	-	-	-	-	-
241	/Fri08/	kaolinitic paper sludge	-	CCW	-	-	700-800 °C	02:00	-	29.4209	-	-	-		12.1469	-	-	-	8.61582	-					49.8588	-	-	-	-	-	-	-	-	-	-	-	-	-	-	-	-	-	-	-	-	-	-	-	-
242	/O'Fa06/	illitic-kaolinitic clay	-	HTC QC	-	-	800 °C	02:00	-	10.7527	-	-	-	24.7312	-	7.52688	-	-	31.1828	-	8.60215				10.7527	-	-	4.30108	-	-	-	-	2.15054	-	-	-	-	-	-	-	-	-	-	-	-	-	-	-	-
243	/O'Fa06/	illitic-kaolinitic clay	-	HTC QC	-	-	800 °C	02:00	-	10.7527	-	-	-	24.7312	-	7.52688	-	-	31.1828	-	8.60215				10.7527	-	-	4.30108	-	-	-	-	2.15054	-	-	-	-	-	-	-	-	-	-	-	-	-	-	-	-
244	/O'Fa06/	illitic-kaolinitic clay	-	HTC QC	-	-	800 °C	02:00	-	10.7527	-	-	-	24.7312	-	7.52688	-	-	31.1828	-	8.60215				10.7527	-	-	4.30108	-	-	-	-	2.15054	-	-	-	-	-	-	-	-	-	-	-	-	-	-	-	-
245	/O'Fa06/	illitic-kaolinitic clay	-	HTC SC	-	-	800 °C	02:00	-	10.7527	-	-	-	24.7312	-	7.52688	-	-	31.1828	-	8.60215				10.7527	-	-	4.30108	-	-	-	-	2.15054	-	-	-	-	-	-	-	-	-	-	-	-	-	-	-	-
246	/O'Fa06/	illitic-kaolinitic clay	-	HTC SC	-	-	800 °C	02:00	-	10.7527	-	-	-	24.7312	-	7.52688	-	-	31.1828	-	8.60215				10.7527	-	-	4.30108	-	-	-	-	2.15054	-	-	-	-	-	-	-	-	-	-	-	-	-	-	-	-
247	/O'Fa06/	illitic-kaolinitic clay	-	HTC SC	-	-	800 °C	02:00	-	10.7527	-	-	-	24.7312	-	7.52688	-	-	31.1828	-	8.60215				10.7527	-	-	4.30108	-	-	-	-	2.15054	-	-	-	-	-	-	-	-	-	-	-	-	-	-	-	-
248	/He96/	Na-montmorillonite	-	NaM	muffle furnace	-	740	01:40	-	-	74	-	-	-	-	-	-	-	5	-	-	-	17		3	-	-	-	-	-	-	-	-	-	-	-	-	-	-	-	-	-	-	-	-	-	-	-	-
249	/He96/	Na-montmorillonite	-	NaM	muffle furnace	-	830	01:40	-	-	74	-	-	-	-	-	-	-	5	-	-	-	17		3	-	-	-	-	-	-	-	-	-	-	-	-	-	-	-	-	-	-	-	-	-	-	-	-
250	/He96/	Na-montmorillonite	-	NaM	muffle furnace	-	920	01:40	-	-	74	-	-	-	-	-	-	-	5	-	-	-	17		3	-	-	-	-	-	-	-	-	-	-	-	-	-	-	-	-	-	-	-	-	-	-	-	-
251	/He96/	Ca-montmorillonite	-	CaM	muffle furnace	-	730	01:40	-	-	-	75	-	-	-	-	-	-	25	-	-	-	-	-	-	-	-	-	-	-	-	-	-	-	-	-	-	-	-	-	-	-	-	-	-	-	-	-	-
252	/He96/	Ca-montmorillonite	-	CaM	muffle furnace	-	830	01:40	-	-	-	75	-	-	-	-	-	-	25	-	-	-	-	-	-	-	-	-	-	-	-	-	-	-	-	-	-	-	-	-	-	-	-	-	-	-	-	-	-
253	/He96/	Ca-montmorillonite	-	CaM	muffle furnace	-	930	01:40	-	-	-	75	-	-	-	-	-	-	25	-	-	-	-	-	-	-	-	-	-	-	-	-	-	-	-	-	-	-	-	-	-	-	-	-	-	-	-	-	-
254	/Bra18/	mixed clay	bulgaria	S	laboratory furnace	< 0.5	800	00:20	-	28	12		-	12	-	6	-	-	19	-	13		-	-	-	-	-	-	-	-	-	-	-	-	-	-	-	-	-	-	-	-	-	-	-	-	-	-	-
255	/Bra18/	smectitic-kaolinitic clay	bulgaria	Ch	laboratory furnace	< 0.5	800	00:20	-	10	36		-	-	-	-	-	-	35	-	-		-	-	-	-	-	-	-	-	-	-	-	-	-	-	-	-	-	-	-	-	-	-	-	-	-	-	-
256	/Bra18/	smectitic-kaolinitic clay	bulgaria	SK	laboratory furnace	< 0.5	800	00:20	-	21	59		-	-	-	-	-	-	11	-	-		-	-	-	-	-	-	-	-	-	-	-	-	-	-	-	-	-	-	-	-	-	-	-	-	-	-	-
257	/Bra18/	smectitic clay	bulgaria	B	laboratory furnace	< 0.5	780	00:20	-	-	60		-	-	-	-	-	-	-	16	-		-	-	11	-	-	-	-	-	-	-	-	-	-	-	-	-	-	-	-	-	-	-	-	-	-	-	-
258	/Bra18/	kaolin	bulgaria	K	laboratory furnace	< 0.5	800	00:20	-	90	-		-	6	-	-	-	-	3	-	-		-	-	-	-	-	-	-	-	-	-	-	-	-	-	-	-	-	-	-	-	-	-	-	-	-	-	-
259	/Bra18/	mixed clay	bulgaria	M	laboratory furnace	< 0.5	800	00:20	-	9	15		-	14	-	-	-	-	28	-	23		-	-	-	-	-	-	-	-	-	-	-	-	-	-	-	-	-	-	-	-	-	-	-	-	-	-	-
260	/Bra18/	mixed clay	bulgaria	D	laboratory furnace	< 0.5	780	00:20	-	6	22		-	21	-	10	-	-	16	-	12		-	-	5	-	-	-	-	-	-	-	-	-	-	-	-	-	-	-	-	-	-	-	-	-	-	-	-
261	/Bra18/	illitic-smectitic clay	bulgaria	BB	laboratory furnace	< 0.5	800	00:20	-	-	14		-	16	-	-	-	-	19	-	31		14	-	-	-	-	-	-	-	-	-	-	-	-	-	-	-	-	-	-	-	-	-	-	-	-	-	-
262	/Mou01/	kaolinitic clay	-	Sample 1	static laboratory furnace	-	750	02:00	-	48	-	-	-	-	-		-	-	50.5	-	-	-	-	-	-	-	-	-	-	-	-	-	-	-	-	1.5	-	-	-	-	-	-	-	-	-	-	-	-	-
263	/Mou01/	kaolinitic clay	-	Sample 2	static laboratory furnace	-	750	02:00	-	65	-	-	-	-	2		-	-	31	-	-	-	-	-	-	-	-	-	-	-	-	-	-	-	-	1.9	-	-	-	-	-	-	-	-	-	-	-	-	-
264	/Mai20, Mai21/	kaolinitic clay	Germany	KT	muffle furnace	-	800	00:30:00	-	20	-		-	-	36	-	-	-	38	-	-	-	-	-	-	-	-	-	-	-	5	-	-	-	-	1	76	-	-	-	-	-	-	-	-	-	-	-	-
265	/Mai20, Mai21/	chloride and mica-rich	Germany	KUP	muffle furnace	-	620	00:30:00	-	26	-		-	-	36	-	-	-	33	-	-	-	-	-	-	-	-	-	-	-	4	-	-	-	-	1	37	-	-	-	-	-	-	-	-	-	-	-	-
266	/Mai20, Mai21/	smectitic mixed clay	Germany	FUP	muffle furnace	-	650	00:30:00	-	74	8		-	3	-	-	-	-	12	-	-	-	-	-	-	-	-	-	-	-	-	-	-	-	1	1	49	-	-	-	-	-	-	-	-	-	-	-	-
267	/Mai20, Mai21/	kaolinitic clay	Germany	RKUP	muffle furnace	-	680	00:30:00	-	45	-		-	-	3	-	-	-	48	-	-			-	-	-	-	-	-	< 1	3	-	-	-	< 1	-	19	-	-	-	-	-	-	-	-	-	-	-	-
268	/Mai20, Mai21/	smectitic-kaolinitic clay	Germany	AC	muffle furnace	-	680	00:30:00	-	23	32		-	-	5	6	-	-	20	-	4			-	7	1	-	1	-	-	-	-	-	-	2	< 1	43	-	-	-	-	-	-	-	-	-	-	-	-
269	/Mai20, Mai21/	smectitic clay	Germany	SW	muffle furnace	-	810	00:30:00	-	7	-		-	-	51	19	-	-	21	-	-			-	-	-	-	-	-	-	-	-	-	-	-	1	31	-	-	-	-	-	-	-	-	-	-	-	-
270	/Mai20, Mai21/	kaolinitc clay	Germany	SCW	muffle furnace	-	620	00:30:00	-	40	20		-	-	18	-	-	-	18	-	-	-	-	-	-	-	-	-	-	2	1	-	-	-	-	2	33	-	-	-	-	-	-	-	-	-	-	-	-
271	/Mai20, Mai21/	kaolinitc clay	Germany	CCW	muffle furnace	-	660	00:30:00	35	10	24		-	11	-	1	-	-	16	-	-			-	< 1	1	1	-	-	< 1	-	-	-	-	-	1	23	-	-	-	-	-	-	-	-	-	-	-	-
272	/Mai20, Mai21/	smectitic clay	Germany	MOSM	muffle furnace	-	700	00:30:00	-	8	25		-	-	19	5	-	-	18	-	7			-	7	10	-	-	-	-	-	-	-	-	1	-	36	-	-	-	-	-	-	-	-	-	-	-	-
273	/Mai20, Mai21/	kaolinitc-smectitic clay	Germany	SLS	muffle furnace	-	740	00:30:00	-	7	40		-	-	15	-	-	-	37	-	-	-	-	-	-	-	-	-	-	-	-	-	-	-	-	2	56	-	-	-	-	-	-	-	-	-	-	-	-
274	/Mai20, Mai21/	kaolinitc clay	Germany	KS	muffle furnace	-	650	00:30:00	-	84	-		-	-	-	-	-	-	16	-	-			-	-	-	-	-	-	-	-	-	-	-	1	-	81	-	-	-	-	-	-	-	-	-	-	-	-
275	/Mai21/	kaolinitc-smectitic clay	Germany	OC	muffle furnace	-	680	00:30:00	-	19.7	37.8		-		5.8	2.4	-	-	21.5	-	-	4.7	-	-	2.4	2.1		0.9	-	-	-	-	-	-	2.2		-	-	-	-	-	-	-	-	-	-	-	-	-
276	/Lon22/	-	-	CY1	-	-	-	-	-	-	-	-	-	-	-	-	-	-	-	-	-	-	-	-	-	-	-	-	-	-	-	-	-	-	-	-	61.6453	2.60328	-	-	-	20.7948	-	13.7237	-	-	-	0.234103	-
277	/Lon22/	-	-	CY2	-	-	-	-	-	-	-	-	-	-	-	-	-	-	-	-	-	-	-	-	-	-	-	-	-	-	-	-	-	-	-	-	50.1611	-	-	-	-	3.3175	-	40.2245	-	-	-	0.17997	-
278	/Lon22/	-	-	CY3	-	-	-	-	-	-	-	-	-	-	-	-	-	-	-	-	-	-	-	-	-	-	-	-	-	-	-	-	-	-	-	-	54.7468	0.555355	-	-	-	5.27871	-	32.962	-	-	-	-	-
279	/Lon22/	-	-	CY4	-	-	-	-	-	-	-	-	-	-	-	-	-	-	-	-	-	-	-	-	-	-	-	-	-	-	-	-	-	-	-	-	45.5163	-	-	-	-	21.6932	-	20.7555	-	-	8.24497	-	-
280	/Lon22/	-	-	CY5	-	-	-	-	-	-	-	-	-	-	-	-	-	-	-	-	-	-	-	-	-	-	-	-	-	-	-	-	-	-	-	-	43.6361	-	-	-	-	18.3596	-	36.8107	-	-	-	-	-
281	/Lon22/	-	-	CY6	-	-	-	-	-	-	-	-	-	-	-	-	-	-	-	-	-	-	-	-	-	-	-	-	-	-	-	-	-	-	-	-	52.7298	0.233333	-	-	-	9.1206	-	18.0672	5.07107	-	4.96023	2.53743	-
282	/Lon22/	-	-	CY7	-	-	-	-	-	-	-	-	-	-	-	-	-	-	-	-	-	-	-	-	-	-	-	-	-	-	-	-	-	-	-	-	77.9861	5.32849	-	-	-		-	0.830357	-	-	-	-	-
283	/Lon22/	-	-	CY8	-	-	-	-	-	-	-	-	-	-	-	-	-	-	-	-	-	-	-	-	-	-	-	-	-	-	-	-	-	-	-	-	82.1309	13.7714	-	-	-	1.73375	-	-	-	-	-	-	-
284	/Lon22/	-	-	CY9	-	-	-	-	-	-	-	-	-	-	-	-	-	-	-	-	-	-	-	-	-	-	-	-	-	-	-	-	-	-	-	-	65.3186	3.31982	-	-	-	7.17527	-	19.7384	-	-	-	-	-
285	/Lon22/	-	-	CY10	-	-	-	-	-	-	-	-	-	-	-	-	-	-	-	-	-	-	-	-	-	-	-	-	-	-	-	-	-	-	-	-	81.0471	0.718685	-	-	-	8.73259	-	7.00219	-	-	-	-	-
286	/ibac/	-	Germany	B8363	-	-	-	-	-	-	-	-	-	-	-	-	-	-	-	-	-	-	-	-	-	-	-	-	-	-	-	-	-	-	-	-	31.5	4.6	-	-	4.3		-	25.6	3.4			-	-
287	/ibac/	-	Germany	B8400	-	-	-	-	-	-	-	-	-	-	-	-	-	-	-	-	-	-	-	-	-	-	-	-	-	-	-	-	-	-	-	-	41.7	2.9	-	-	1.7		-	10.1	1.5			-	-
288	/ibac/	-	Germany	B8457	-	-	-	-	-	-	-	-	-	-	-	-	-	-	-	-	-	-	-	-	-	-	-	-	-	-	-	-	-	-	-	-	33.5	1.4	-	-	6.4		-	24	1.9			-	-
289	/ibac/	-	Germany	A-rot	-	-	-	-	-	-	-	-	-	-	-	-	-	-	-	-	-	-	-	-	-	-	-	-	-	-	-	-	-	-	-	-	53.9	-	-	-	5.3		-	4.7	1.8			-	-
290	/ibac/	-	Germany	A (0-2)	-	-	-	-	-	-	-	-	-	-	-	-	-	-	-	-	-	-	-	-	-	-	-	-	-	-	-	-	-	-	-	-	48.2	1.8	-	-	19.9		-	4.8	2			-	-
291	/ibac/	-	Germany	B-LG	-	-	-	-	-	-	-	-	-	-	-	-	-	-	-	-	-	-	-	-	-	-	-	-	-	-	-	-	-	-	-	-	73.3	-	-	-	-			0.8	-			-	-
292	/ibac/	-	-	B1	-	-	-	-	15.3	69.6	-	-	-	2.7		-	-	-	10.8	-	-	-	-	-	-	-	-	-	-	-	-	-	-	-	1.6	-	-	-	-	-	-	-	-	-	-	-	-	-	-
293	/ibac/	-	-	B2	-	-	-	-	3.1	65.7	-	-	-	-	-	-	-	-	-	-	-	-	-	14.9	0.1	-	-	-	-	10.7		-	-	-	5.5	-	-	-	-	-	-	-	-	-	-	-	-	-	-
294	/ibac/	-	-	C1	-	-	-	-	20.5	52.3	-	-	-	-	-	-	-	-	0.2	-	-	-	-	-	-	-	-	-	-	-	20.8	6.2	-	-	-	-	-	-	-	-	-	-	-	-	-	-	-	-	-
295	/ibac/	-	-	C2	-	-	-	-	18.3	51.8	-	-	-	-	-	-	-	-	26.7	-	-	-	-	-	-	-	-	-	-	3	-	-	-	-	0.3	-	-	-	-	-	-	-	-	-	-	-	-	-	-
296	/ibac/	-	-	C3	-	-	-	-	16.7	47.5	-	-	-	-	-	-	-	-	22.6	-	-	-	-	-	0.2	-	-	-	-	-	13	-	-	-	-	-	-	-	-	-	-	-	-	-	-	-	-	-	-
297	/ibac/	-	-	D1	-	-	-	-	4.9	21.2	-	-	-	14.4		-	-	-	57.5						1	-	-	-	-	0.6	-	-	-	-	0.4	-	-	-	-	-	-	-	-	-	-	-	-	-	-
298	/ibac/	-	-	D2	-	-	-	-	32.6	5.9	-	-	-	-	-	-	-	-	33.2	-	-	-	-	-	26.8	-	-	-	1.5	-	-	-	-	-	-	-	-	-	-	-	-	-	-	-	-	-	-	-	-
299	/ibac/	kaolinitc clay	-	Mk1	-	-	-	-	-	-	-	-	-	-	-	-	-	-	-	-	-	-	-	-	-	-	-	-	-	-	-	-	-	-	-	-	94	2					-	-				-	-
300	/ibac/	kaolinitc clay	-	Mk2	-	-	-	-	-	-	-	-	-	-	-	-	-	-	-	-	-	-	-	-	-	-	-	-	-	-	-	-	-	-	-	-	70	12					-	-	4			-	-
301	/ibac/	kaolinitc clay	-	Mk3	-	-	-	-	-	-	-	-	-	-	-	-	-	-	-	-	-	-	-	-	-	-	-	-	-	-	-	-	-	-	-	-	80	12					-	-	2			-	-
302	/ibac/	kaolinitc clay	-	Mk4	-	-	-	-	-	-	-	-	-	-	-	-	-	-	-	-	-	-	-	-	-	-	-	-	-	-	-	-	-	-	-	-	76	12					-	-	8			-	-
303	/ibac/	kaolinitc clay	-	Mk5	-	-	-	-	-	-	-	-	-	-	-	-	-	-	-	-	-	-	-	-	-	-	-	-	-	-	-	-	-	-	-	-	63	6					-	-	-	-	-	-	-
304
305
306									min	1	0.2	12.7	2.7
307									max	97	74	75	2.7
308
309
310
311
312
313
314
315
316
317
318
319
320
321
322
323
324
325
326
327
328
329
330
331
332
333
334
335
336
337
338
339
340
341
342
343
344
345
346
347
348
349
350
351
352
353
354
355
356
357
358
359
360
361
362
363
364
365
366
367
368
369
370
371
372
373
374
375
376
377
378
379
380
381
382
383
384
385
386
387
388
389
390
391
392
393
394
395
396
397
398
399
400
401
402
403
404
405
406
407
408
409
410
411
412
413
414
415
416
417
418
419
420
421
422
423
424
425
426
427
428
429
430
431
432
433
434
435
436
437
438
439
440
441
442
443
444
445
446
447
448
449
450
451
452
453
454
455
456
457
458
459
460
461
462
463
464
465
466
467
468
469
470
471
472
473
474
475
476
477
478
479
480
481
482
483
484
485
486
487
488
489
490
491
492
493
494
495
496
497
498
499
500
501
502
503
504
505
506
507
508
509
510
511
512
513
514
515
516
517
518
519
520
521
522
523
524
525
526
527
528
529
530
531
532
533
534
535
536
537
538
539
540
541
542
543
544
545
546
547
548
549
550
551
552
553
554
555
556
557
558
559
560
561
562
563
564
565
566
567
568
569
570
571
572
573
574
575
576
577
578
579
580
581
582
583
584
585
586
587
588
589
590
591
592
593
594
595
596
597
598
599
600
601
602
603
604
605
606
607
608
609
610
611
612
613
614
615
616
617
618
619
620
621
622
623
624
625
626
627
628
629
630
631
632
633
634
635
636
637
638
639
640
641
642
643
644
645
646
647
648
649
650
651
652
653
654
655
656
657
658
659
660
661
662
663
664
665
666
667
668
669
670
671
672
673
674
675
676
677
678
679
680
681
682
683
684
685
686
687
688
689
690
691
692
693
694
695
696
697
698
699
700
701
702
703
704
705
706
707
708
709
710
711
712
713
714
715
716
717
718
719
720
721
722
723
724
725
726
727
728
729
730
731
732
733
734
735
736
737
738
739
740
741
742
743
744
745
746
747
748
749
750
751
752
753
754
755
756
757
758
759
760
761
762
763
764
765
766
767
768
769
770
771
772
773
774
775
776
777
778
779
780
781
782
783
784
785
786
787
788
789
790
791
792
793
794
795
796
797
798
799
800
801
802
803
804
805
806
807
808
809
810
811
812
813
814
815
816
817
818
819
820
821
822
823
824
825
826
827
828
829
830
831
832
833
834
835
836
837
838
839
840
841
842
843
844
845
846
847
848
849
850
851
852
853
854
855
856
857
858
859
860
861
862
863
864
865
866
867
868
869
870
871
872
873
874
875
876
877
878
879
880
881
882
883
884
885
886
887
888
889
890
891
892
893
894
895
896
897
898
899
900
901
902
903
904
905
906
907
908
909
910
911
912
913
914
915
916
917
918
919
920
921
922
923
924
925
926
927
928
929
930
931
932
933
934
935
936
937
938
939
940
941
942
943
944
945
946
947
948
949
950
951
952
953
954
955
956
957
958
959
960
961
962
963
964
965
966
967
968
969
970
971
972
973
974
975
976
977
978
979
980
981
982
983
984
985
986
987
988
989
990
991
992
993
994
995
996
997
998
999
1000
[truncated: 30 more columns]

## Sheet: physical properties
sample No.	reference	Calcined Clay							characteristics of the raw clay prior to calcination									characteristics of the calcined clay prior to experimental program										cement for mortar tests
		raw material category	origin country	sample name	calcination furnace	max. grainsize before calcination	calcination temperature	calcination duration	skeletal density	Blaine	BET	d10	d50	d90	D100	RRSB d'	RRSB n	skeletal density	Blaine	BET	d10	d50	d90	D100	RRSB d'	RRSB n	water demand	skeletal density	Blaine	BET	d10	d50	d90	D100	RRSB d'	RRSB n	grain proportion > 90 µm	grain proportion > 45 µm	water demand	soundness (Chatelier)	setting start	setting end
-		-		-	-	mm	°C	h	kg/m³	cm²/g	m2/g	µm	µm	µm	µm	µm	-	kg/m³	cm²/g	m²/g	µm	µm	µm	µm	µm	-	%	kg/m³	cm²/g	m²/g	µm	µm	µm	µm	µm	-	M.-%	M.-%	M.-%	mm	h:min	h:min
1	/Beu12/	illitic-kaolinitic clay	Germany	Lias Delta Clay	rotary kiln	< 100	< 950	00:35:00	-	-	-	-	-	-	-	-	-	2570	5700	-	-	44.693	-	-	-	-	38	3100	4800	-	-	-	-	-	-	-	-	-	24	-	-	-
2	/Beu12/	illitic-kaolinitic clay	Germany	Lias Delta Clay	rotary kiln	< 100	< 950	00:35:00	-	-	-	-	-	-	-	-	-	2570	5700	-	-	44.693	-	-	-	-	38	3100	4450	-	-	-	-	-	-	-	-	-	27	-	-	-
3	/Beu12/	illitic-kaolinitic clay	Germany	Lias Delta Clay	rotary kiln	< 100	< 950	00:35:00	-	-	-	-	-	-	-	-	-	2570	5700	-	-	44.693	-	-	-	-	38	3000	5800	-	-	-	-	-	-	-	-	-	29	-	-	-
4	/Dan13/	kaolinitic clay	Portugal	AB1080	muffle kiln	-	700	00:45:00	-	-	-	-	-	-	-	-	-	-	-	-	-	-	-	-	-	-	-	-	-	-	-	-	-	-	-	-	-	-	-	-	-	-
5	/Dan13/	kaolinitic clay	Portugal	AB1080	muffle kiln	-	725	00:45:00	-	-	-	-	-	-	-	-	-	-	-	-	-	-	-	-	-	-	-	-	-	-	-	-	-	-	-	-	-	-	-	-	-	-
6	/Dan13/	kaolinitic clay	Portugal	AB1080	muffle kiln	-	750	00:45:00	-	-	-	-	-	-	-	-	-	-	-	-	-	-	-	-	-	-	-	-	-	-	-	-	-	-	-	-	-	-	-	-	-	-
7	/Dan13/	kaolinitic clay	Portugal	AB1080	muffle kiln	-	775	00:45:00	-	-	-	-	-	-	-	-	-	-	-	-	-	-	-	-	-	-	-	-	-	-	-	-	-	-	-	-	-	-	-	-	-	-
8	/Dan13/	kaolinitic clay	Portugal	AB1080	muffle kiln	-	800	00:45:00	-	-	-	-	-	-	-	-	-	-	-	-	-	-	-	-	-	-	-	-	-	-	-	-	-	-	-	-	-	-	-	-	-	-
9	/Dan13/	kaolinitic clay	Portugal	Aldeia e Irmao	muffle kiln	-	700	00:45:00	-	-	-	-	-	-	-	-	-	-	-	-	-	-	-	-	-	-	-	-	-	-	-	-	-	-	-	-	-	-	-	-	-	-
10	/Dan13/	kaolinitic clay	Portugal	Aldeia e Irmao	muffle kiln	-	725	00:45:00	-	-	-	-	-	-	-	-	-	-	-	-	-	-	-	-	-	-	-	-	-	-	-	-	-	-	-	-	-	-	-	-	-	-
11	/Dan13/	kaolinitic clay	Portugal	Aldeia e Irmao	muffle kiln	-	750	00:45:00	-	-	-	-	-	-	-	-	-	-	-	-	-	-	-	-	-	-	-	-	-	-	-	-	-	-	-	-	-	-	-	-	-	-
12	/Dan13/	kaolinitic clay	Portugal	Aldeia e Irmao	muffle kiln	-	775	00:45:00	-	-	-	-	-	-	-	-	-	-	-	-	-	-	-	-	-	-	-	-	-	-	-	-	-	-	-	-	-	-	-	-	-	-
13	/Dan13/	kaolinitic clay	Portugal	Aldeia e Irmao	muffle kiln	-	800	00:45:00	-	-	-	-	-	-	-	-	-	-	-	-	-	-	-	-	-	-	-	-	-	-	-	-	-	-	-	-	-	-	-	-	-	-
14	/Dan13/	kaolinitic clay	Portugal	Kal-Sorgila	muffle kiln	-	700	00:45:00	-	-	-	-	-	-	-	-	-	-	-	-	-	-	-	-	-	-	-	-	-	-	-	-	-	-	-	-	-	-	-	-	-	-
15	/Dan13/	kaolinitic clay	Portugal	Kal-Sorgila	muffle kiln	-	725	00:45:00	-	-	-	-	-	-	-	-	-	-	-	-	-	-	-	-	-	-	-	-	-	-	-	-	-	-	-	-	-	-	-	-	-	-
16	/Dan13/	kaolinitic clay	Portugal	Kal-Sorgila	muffle kiln	-	750	00:45:00	-	-	-	-	-	-	-	-	-	-	-	-	-	-	-	-	-	-	-	-	-	-	-	-	-	-	-	-	-	-	-	-	-	-
17	/Dan13/	kaolinitic clay	Portugal	Kal-Sorgila	muffle kiln	-	775	00:45:00	-	-	-	-	-	-	-	-	-	-	-	-	-	-	-	-	-	-	-	-	-	-	-	-	-	-	-	-	-	-	-	-	-	-
18	/Dan13/	kaolinitic clay	Portugal	Kal-Sorgila	muffle kiln	-	800	00:45:00	-	-	-	-	-	-	-	-	-	-	-	-	-	-	-	-	-	-	-	-	-	-	-	-	-	-	-	-	-	-	-	-	-	-
19	/Dan13/	kaolinitic clay	Portugal	Argila Sorgia	muffle kiln	-	700	00:45:00	-	-	-	-	-	-	-	-	-	-	-	-	-	-	-	-	-	-	-	-	-	-	-	-	-	-	-	-	-	-	-	-	-	-
20	/Dan13/	kaolinitic clay	Portugal	Argila Sorgia	muffle kiln	-	750	00:45:00	-	-	-	-	-	-	-	-	-	-	-	-	-	-	-	-	-	-	-	-	-	-	-	-	-	-	-	-	-	-	-	-	-	-
21	/Dan13/	kaolinitic clay	Portugal	Argila Sorgia	muffle kiln	-	800	00:45:00	-	-	-	-	-	-	-	-	-	-	-	-	-	-	-	-	-	-	-	-	-	-	-	-	-	-	-	-	-	-	-	-	-	-
22	/Dan13/	illitic clay	Portugal	Argila Rascoia	muffle kiln	-	700	00:45:00	-	-	-	-	-	-	-	-	-	-	-	-	-	-	-	-	-	-	-	-	-	-	-	-	-	-	-	-	-	-	-	-	-	-
23	/Dan13/	illitic clay	Portugal	Argila Rascoia	muffle kiln	-	750	00:45:00	-	-	-	-	-	-	-	-	-	-	-	-	-	-	-	-	-	-	-	-	-	-	-	-	-	-	-	-	-	-	-	-	-	-
24	/Dan13/	illitic clay	Portugal	Argila Rascoia	muffle kiln	-	800	00:45:00	-	-	-	-	-	-	-	-	-	-	-	-	-	-	-	-	-	-	-	-	-	-	-	-	-	-	-	-	-	-	-	-	-	-
25	/Dan13/	smectitic marl	Denmark	Sovind Marl	muffle kiln	-	700	00:45:00	-	-	-	-	-	-	-	-	-	-	-	-	-	-	-	-	-	-	-	-	-	-	-	-	-	-	-	-	-	-	-	-	-	-
26	/Dan13/	smectitic marl	Denmark	Sovind Marl	muffle kiln	-	750	00:45:00	-	-	-	-	-	-	-	-	-	-	-	-	-	-	-	-	-	-	-	-	-	-	-	-	-	-	-	-	-	-	-	-	-	-
27	/Dan13/	smectitic marl	Denmark	Sovind Marl	muffle kiln	-	800	00:45:00	-	-	-	-	-	-	-	-	-	-	-	-	-	-	-	-	-	-	-	-	-	-	-	-	-	-	-	-	-	-	-	-	-	-
28	/Dan13/	smectitic marl	Denmark	Sovind Marl	muffle kiln	-	850	00:45:00	-	-	-	-	-	-	-	-	-	-	-	-	-	-	-	-	-	-	-	-	-	-	-	-	-	-	-	-	-	-	-	-	-	-
29	/Dan13/	smectitic marl	Denmark	Sovind Marl	muffle kiln	-	900	00:45:00	-	-	-	-	-	-	-	-	-	-	-	-	-	-	-	-	-	-	-	-	-	-	-	-	-	-	-	-	-	-	-	-	-	-
30	/Dan13/	smectitic marl	Denmark	Sovind Marl	muffle kiln	-	950	00:45:00	-	-	-	-	-	-	-	-	-	-	-	-	-	-	-	-	-	-	-	-	-	-	-	-	-	-	-	-	-	-	-	-	-	-
31	/Dan13/	smectitic marl	Denmark	Sovind Marl	muffle kiln	-	1000	00:45:00	-	-	-	-	-	-	-	-	-	-	-	-	-	-	-	-	-	-	-	-	-	-	-	-	-	-	-	-	-	-	-	-	-	-
32	/Dan13/	smectitic marl	Denmark	Sovind Marl	industrial rotary kiln	-	750	-	-	-	-	-	-	-	-	-	-	-	-	-	-	-	-	-	-	-	-	-	-	-	-	-	-	-	-	-	-	-	-	-	-	-
33	/Dan13/	smectitic marl	Denmark	Sovind Marl	industrial rotary kiln	-	800	-	-	-	-	-	-	-	-	-	-	-	-	-	-	-	-	-	-	-	-	-	-	-	-	-	-	-	-	-	-	-	-	-	-	-
34	/Dan13/	smectitic marl	Denmark	Sovind Marl	industrial rotary kiln	-	850	-	-	-	-	-	-	-	-	-	-	-	-	-	-	-	-	-	-	-	-	-	-	-	-	-	-	-	-	-	-	-	-	-	-	-
35	/Dan13/	smectitic marl	Denmark	Sovind Marl	industrial rotary kiln	-	900	-	-	-	-	-	-	-	-	-	-	-	-	-	-	-	-	-	-	-	-	-	-	-	-	-	-	-	-	-	-	-	-	-	-	-
36	/Dan13/	smectitic marl	Denmark	Sovind Marl	industrial rotary kiln	-	950	-	-	-	-	-	-	-	-	-	-	-	-	-	-	-	-	-	-	-	-	-	-	-	-	-	-	-	-	-	-	-	-	-	-	-
37	/Dan13/	smectitic marl	Denmark	Sovind Marl H2	muffle kiln	-	600	00:45:00	-	-	-	-	-	-	-	-	-	-	-	-	-	-	-	-	-	-	-	-	-	-	-	-	-	-	-	-	-	-	-	-	-	-
38	/Dan13/	smectitic marl	Denmark	Sovind Marl H2	muffle kiln	-	650	00:45:00	-	-	-	-	-	-	-	-	-	-	-	-	-	-	-	-	-	-	-	-	-	-	-	-	-	-	-	-	-	-	-	-	-	-
39	/Dan13/	smectitic marl	Denmark	Sovind Marl H2	muffle kiln	-	700	00:45:00	-	-	-	-	-	-	-	-	-	-	-	-	-	-	-	-	-	-	-	-	-	-	-	-	-	-	-	-	-	-	-	-	-	-
40	/Dan13/	smectitic marl	Denmark	Sovind Marl H2	muffle kiln	-	750	00:45:00	-	-	-	-	-	-	-	-	-	-	-	-	-	-	-	-	-	-	-	-	-	-	-	-	-	-	-	-	-	-	-	-	-	-
41	/Dan13/	smectitic marl	Denmark	Sovind Marl H2	muffle kiln	-	800	00:45:00	-	-	-	-	-	-	-	-	-	-	-	-	-	-	-	-	-	-	-	-	-	-	-	-	-	-	-	-	-	-	-	-	-	-
42	/Dan13/	smectitic marl	Denmark	Sovind Marl H2	muffle kiln	-	850	00:45:00	-	-	-	-	-	-	-	-	-	-	-	-	-	-	-	-	-	-	-	-	-	-	-	-	-	-	-	-	-	-	-	-	-	-
43	/Dan13/	smectitic marl	Denmark	Sovind Marl H3	muffle kiln	-	600	00:45:00	-	-	-	-	-	-	-	-	-	-	-	-	-	-	-	-	-	-	-	-	-	-	-	-	-	-	-	-	-	-	-	-	-	-
44	/Dan13/	smectitic marl	Denmark	Sovind Marl H3	muffle kiln	-	650	00:45:00	-	-	-	-	-	-	-	-	-	-	-	-	-	-	-	-	-	-	-	-	-	-	-	-	-	-	-	-	-	-	-	-	-	-
45	/Dan13/	smectitic marl	Denmark	Sovind Marl H3	muffle kiln	-	700	00:45:00	-	-	-	-	-	-	-	-	-	-	-	-	-	-	-	-	-	-	-	-	-	-	-	-	-	-	-	-	-	-	-	-	-	-
46	/Dan13/	smectitic marl	Denmark	Sovind Marl H3	muffle kiln	-	750	00:45:00	-	-	-	-	-	-	-	-	-	-	-	-	-	-	-	-	-	-	-	-	-	-	-	-	-	-	-	-	-	-	-	-	-	-
47	/Dan13/	smectitic marl	Denmark	Sovind Marl H3	muffle kiln	-	800	00:45:00	-	-	-	-	-	-	-	-	-	-	-	-	-	-	-	-	-	-	-	-	-	-	-	-	-	-	-	-	-	-	-	-	-	-
48	/Dan13/	smectitic marl	Denmark	Sovind Marl H3	muffle kiln	-	850	00:45:00	-	-	-	-	-	-	-	-	-	-	-	-	-	-	-	-	-	-	-	-	-	-	-	-	-	-	-	-	-	-	-	-	-	-
49	/Dan13/	smectitic marl	Denmark	Sovind Marl H4	muffle kiln	-	600	00:45:00	-	-	-	-	-	-	-	-	-	-	-	-	-	-	-	-	-	-	-	-	-	-	-	-	-	-	-	-	-	-	-	-	-	-
50	/Dan13/	smectitic marl	Denmark	Sovind Marl H4	muffle kiln	-	650	00:45:00	-	-	-	-	-	-	-	-	-	-	-	-	-	-	-	-	-	-	-	-	-	-	-	-	-	-	-	-	-	-	-	-	-	-
51	/Dan13/	smectitic marl	Denmark	Sovind Marl H4	muffle kiln	-	700	00:45:00	-	-	-	-	-	-	-	-	-	-	-	-	-	-	-	-	-	-	-	-	-	-	-	-	-	-	-	-	-	-	-	-	-	-
52	/Dan13/	smectitic marl	Denmark	Sovind Marl H4	muffle kiln	-	750	00:45:00	-	-	-	-	-	-	-	-	-	-	-	-	-	-	-	-	-	-	-	-	-	-	-	-	-	-	-	-	-	-	-	-	-	-
53	/Dan13/	smectitic marl	Denmark	Sovind Marl H4	muffle kiln	-	800	00:45:00	-	-	-	-	-	-	-	-	-	-	-	-	-	-	-	-	-	-	-	-	-	-	-	-	-	-	-	-	-	-	-	-	-	-
54	/Dan13/	smectitic marl	Denmark	Sovind Marl H4	muffle kiln	-	850	00:45:00	-	-	-	-	-	-	-	-	-	-	-	-	-	-	-	-	-	-	-	-	-	-	-	-	-	-	-	-	-	-	-	-	-	-
55	/Dan13/	illitic clay	Poland	Gniew	muffle kiln	-	700	00:45:00	-	-	-	-	-	-	-	-	-	-	-	-	-	-	-	-	-	-	-	-	-	-	-	-	-	-	-	-	-	-	-	-	-	-
56	/Dan13/	illitic clay	Poland	Gniew	muffle kiln	-	725	00:45:00	-	-	-	-	-	-	-	-	-	-	-	-	-	-	-	-	-	-	-	-	-	-	-	-	-	-	-	-	-	-	-	-	-	-
57	/Dan13/	illitic clay	Poland	Gniew	muffle kiln	-	750	00:45:00	-	-	-	-	-	-	-	-	-	-	-	-	-	-	-	-	-	-	-	-	-	-	-	-	-	-	-	-	-	-	-	-	-	-
58	/Dan13/	illitic clay	Poland	Gniew	muffle kiln	-	775	00:45:00	-	-	-	-	-	-	-	-	-	-	-	-	-	-	-	-	-	-	-	-	-	-	-	-	-	-	-	-	-	-	-	-	-	-
59	/Dan13/	illitic clay	Poland	Gniew	muffle kiln	-	800	00:45:00	-	-	-	-	-	-	-	-	-	-	-	-	-	-	-	-	-	-	-	-	-	-	-	-	-	-	-	-	-	-	-	-	-	-
60	/Tol07/	calcined-clay brick	Brazil	GCWCCB	-	-	850	-	-	-	-	-	-	-	-	-	-	2650	-	1.899	-	-	-	-	-	-	-	-	-	-	-	-	-	-	-	-	-	-	-	-	-	-
61	/Tol07/	calcined-clay brick	Brazil	GCWCCB	-	-	850	-	-	-	-	-	-	-	-	-	-	2650	-	1.899	-	-	-	-	-	-	-	-	-	-	-	-	-	-	-	-	-	-	-	-	-	-
62	/Tol07/	calcined-clay brick	Brazil	GCWCCB	-	-	850	-	-	-	-	-	-	-	-	-	-	2650	-	1.899	-	-	-	-	-	-	-	-	-	-	-	-	-	-	-	-	-	-	-	-	-	-
63	/Tol07/	calcined-clay brick	Brazil	GCWCCB	-	-	850	-	-	-	-	-	-	-	-	-	-	2650	-	1.899	-	-	-	-	-	-	-	-	-	-	-	-	-	-	-	-	-	-	-	-	-	-
64	/Tol07/	calcined-clay brick	Brazil	GCWCCB	-	-	850	-	-	-	-	-	-	-	-	-	-	2650	-	1.899	-	-	-	-	-	-	-	-	-	-	-	-	-	-	-	-	-	-	-	-	-	-
65	/Tol07/	calcined-clay brick	Brazil	GCWCCB	-	-	850	-	-	-	-	-	-	-	-	-	-	2650	-	1.899	-	-	-	-	-	-	-	-	-	-	-	-	-	-	-	-	-	-	-	-	-	-
66	/Tol07/	calcined-clay brick	Brazil	GCWCCB	-	-	850	-	-	-	-	-	-	-	-	-	-	2650	-	1.899	-	-	-	-	-	-	-	-	-	-	-	-	-	-	-	-	-	-	-	-	-	-
67	/Tol07/	calcined-clay brick	Brazil	GCWCCB	-	-	850	-	-	-	-	-	-	-	-	-	-	2650	-	1.899	-	-	-	-	-	-	-	-	-	-	-	-	-	-	-	-	-	-	-	-	-	-
68	/Beu15/	kaolinitc clay	Germany	LCT	muffle furnace	-	720	00:60	2720	-	27.5	-	-	-	-	-	-	-	-	-	-	-	-	-	-	-	-	-	-	-	-	-	-	-	-	-	-	-	-	-	-	-
69	/Beu15/	kaolinitc clay	Germany	GCT	rotary kiln	-	750	-	2720	-	27.5	-	-	-	-	-	-	2630	-	5.62	-	-	-	-	-	-	-	-	-	-	-	-	-	-	-	-	-	-	-	-	-	-
70	/Beu15/	kaolinitc clay	Germany	LCT	muffle furnace	-	600	00:60	2720	-	27.5	-	-	-	-	-	-	-	-	19.59	-	-	-	-	-	-	-	-	-	-	-	-	-	-	-	-	-	-	-	-	-	-
71	/Beu15/	kaolinitc clay	Germany	GCT	rotary kiln	-	600	-	2720	-	27.5	-	-	-	-	-	-	-	-		-	-	-	-	-	-	-	-	-	-	-	-	-	-	-	-	-	-	-	-	-	-
72	/Beu15/	kaolinitc clay	Germany	LCT	muffle furnace	-	770	00:60	2720	-	27.5	-	-	-	-	-	-	-	-		-	-	-	-	-	-	-	-	-	-	-	-	-	-	-	-	-	-	-	-	-	-
73	/Beu15/	kaolinitc clay	Germany	GCT	rotary kiln	-	800	-	2720	-	27.5	-	-	-	-	-	-	-	-		-	-	-	-	-	-	-	-	-	-	-	-	-	-	-	-	-	-	-	-	-	-
74	/Beu15/	kaolinitc clay	Germany	LCT	muffle furnace	-	820	00:60	2720	-	27.5	-	-	-	-	-	-	2660	-	3.02	-	-	-	-	-	-	-	-	-	-	-	-	-	-	-	-	-	-	-	-	-	-
75	/Beu15/	kaolinitc clay	Germany	GCT	rotary kiln	-	850	-	2720	-	27.5	-	-	-	-	-	-	2660	-		-	-	-	-	-	-	-	-	-	-	-	-	-	-	-	-	-	-	-	-	-	-
76	/Beu15/	kaolinitc clay	Germany	LCT	muffle furnace	-	1000	00:60	2720	-	27.5	-	-	-	-	-	-	-	-	1.42	-	-	-	-	-	-	-	-	-	-	-	-	-	-	-	-	-	-	-	-	-	-
77	/Beu15/	kaolinitc clay	Germany	GCT	rotary kiln	-	1000	-	2720	-	27.5	-	-	-	-	-	-	-	-		-	-	-	-	-	-	-	-	-	-	-	-	-	-	-	-	-	-	-	-	-	-
78	/Trü19/	kaolinitc clay	-	K_700_D	pilot rotary kiln	-	700	00:10:00	-	-	-	-	-	-	-	-	-	-	-	5.5	-	-	-	-	18	1.25	-	-	3520	-	-	-	-	-	-	-	-	-	-	-	-	-
79	/Trü19/	kaolinitc clay	-	K_700_D	pilot rotary kiln	-	700	00:10:00	-	-	-	-	-	-	-	-	-	-	-	5.5	-	-	-	-	18	1.25	-	-	4600	-	-	-	-	-	-	-	-	-	-	-	-	-
80	/Trü19/	Illitic clay	-	I_900_D	pilot rotary kiln	-	900	00:10:00	-	-	-	-	-	-	-	-	-	-	-	4.9	-	-	-	-	7.6	1.06	-	-	3520	-	-	-	-	-	-	-	-	-	-	-	-	-
81	/Trü19/	Illitic clay	-	I_900_D	pilot rotary kiln	-	900	00:10:00	-	-	-	-	-	-	-	-	-	-	-	4.9	-	-	-	-	7.6	1.06	-	-	4600	-	-	-	-	-	-	-	-	-	-	-	-	-
82	/Trü19/	smectitic clay	-	M_900_D	pilot rotary kiln	-	900	00:10:00	-	-	-	-	-	-	-	-	-	-	-	9.4	-	-	-	-	8.8	1.09	-	-	3520	-	-	-	-	-	-	-	-	-	-	-	-	-
83	/Trü19/	smectitic clay	-	M_900_D	pilot rotary kiln	-	900	00:10:00	-	-	-	-	-	-	-	-	-	-	-	9.4	-	-	-	-	8.8	1.09	-	-	4600	-	-	-	-	-	-	-	-	-	-	-	-	-
84	/He95/	Illitic clay	USA	Illite	muffle furnace	-	650	01:40:00	2770	-	2.78	-	-	-	-	-	-	2780	-	2.71	-	-	-	-	-	-	-	-	-	-	-	-	-	-	-	-	-	-	-	-	-	-
85	/He95/	Illitic clay	USA	Illite	muffle furnace	-	790	01:40:00	2770	-	2.78	-	-	-	-	-	-	2700	-	2.68	-	-	-	-	-	-	-	-	-	-	-	-	-	-	-	-	-	-	-	-	-	-
86	/He95/	Illitic clay	USA	Illite	muffle furnace	-	930	01:40:00	2770	-	2.78	-	-	-	-	-	-	2640	-	2.65	-	-	-	-	-	-	-	-	-	-	-	-	-	-	-	-	-	-	-	-	-	-
87	/He94/	kaolin	Denmark?	kaolin	muffle furnace	-	550	01:40:00	2740	9830	15.3	-	-	-	-	-	-	2660	15150	16.6	-	-	-	-	-	-	-	-	-	-	-	-	-	-	-	-	-	-	-	-	-	-
88	/He94/	kaolin	Denmark?	kaolin	muffle furnace	-	650	01:40:00	2740	9830	15.3	-	-	-	-	-	-	2700	14220	16.4	-	-	-	-	-	-	-	-	-	-	-	-	-	-	-	-	-	-	-	-	-	-
89	/He94/	kaolin	Denmark?	kaolin	muffle furnace	-	800	01:40:00	2740	9830	15.3	-	-	-	-	-	-	2730	12800	15.9	-	-	-	-	-	-	-	-	-	-	-	-	-	-	-	-	-	-	-	-	-	-
90	/He94/	kaolin	Denmark?	kaolin	muffle furnace	-	950	01:40:00	2740	9830	15.3	-	-	-	-	-	-	2820	8180	11.2	-	-	-	-	-	-	-	-	-	-	-	-	-	-	-	-	-	-	-	-	-	-
91	/Bal21/	kaolinitic-illitic clay	Russian Federation	Nikitsky	-	-	200	1900-01-08	-	7800	-	-	-	-	-	-	-	-	7800	-	-	-	-	-	-	-	-	-	-	-	-	-	-	-	-	-	-	-	-	-	-	-
92	/Bal21/	kaolinitic-illitic clay	Russian Federation	Nikitsky	-	-	400	02:00:00	-	7800	-	-	-	-	-	-	-	-	5200	-	-	-	-	-	-	-	-	-	-	-	-	-	-	-	-	-	-	-	-	-	-	-
93	/Bal21/	kaolinitic-illitic clay	Russian Federation	Nikitsky	-	-	600	02:00:00	-	7800	-	-	-	-	-	-	-	-	-	-	-	-	-	-	-	-	-	-	-	-	-	-	-	-	-	-	-	-	-	-	-	-
94	/Bal21/	kaolinitic-illitic clay	Russian Federation	Nikitsky	-	-	700	02:00:00	-	7800	-	-	-	-	-	-	-	-	-	-	-	-	-	-	-	-	-	-	-	-	-	-	-	-	-	-	-	-	-	-	-	-
95	/Bal21/	kaolinitic-illitic clay	Russian Federation	Nikitsky	-	-	800	02:00:00	-	7800	-	-	-	-	-	-	-	-	-	-	-	-	-	-	-	-	-	-	-	-	-	-	-	-	-	-	-	-	-	-	-	-
96	/Bal21/	kaolinitic-illitic clay	Russian Federation	Nikitsky	-	-	900	02:00:00	-	7800	-	-	-	-	-	-	-	-	-	-	-	-	-	-	-	-	-	-	-	-	-	-	-	-	-	-	-	-	-	-	-	-
97	/Bal21/	illitic-kaolinitic clay	Russian Federation	Staroshaigovsky	-	-	200	02:00:00	-	5200	-	-	-	-	-	-	-	-	-	-	-	-	-	-	-	-	-	-	-	-	-	-	-	-	-	-	-	-	-	-	-	-
98	/Bal21/	illitic-kaolinitic clay	Russian Federation	Staroshaigovsky	-	-	400	02:00:00	-	5200	-	-	-	-	-	-	-	-	-	-	-	-	-	-	-	-	-	-	-	-	-	-	-	-	-	-	-	-	-	-	-	-
99	/Bal21/	illitic-kaolinitic clay	Russian Federation	Staroshaigovsky	-	-	600	02:00:00	-	5200	-	-	-	-	-	-	-	-	-	-	-	-	-	-	-	-	-	-	-	-	-	-	-	-	-	-	-	-	-	-	-	-
100	/Bal21/	illitic-kaolinitic clay	Russian Federation	Staroshaigovsky	-	-	700	02:00:00	-	5200	-	-	-	-	-	-	-	-	-	-	-	-	-	-	-	-	-	-	-	-	-	-	-	-	-	-	-	-	-	-	-	-
101	/Bal21/	illitic-kaolinitic clay	Russian Federation	Staroshaigovsky	-	-	800	02:00:00	-	5200	-	-	-	-	-	-	-	-	-	-	-	-	-	-	-	-	-	-	-	-	-	-	-	-	-	-	-	-	-	-	-	-
102	/Bal21/	illitic-kaolinitic clay	Russian Federation	Staroshaigovsky	-	-	900	02:00:00	-	5200	-	-	-	-	-	-	-	-	-	-	-	-	-	-	-	-	-	-	-	-	-	-	-	-	-	-	-	-	-	-	-	-
103	/Dan19/	kaolinitic clay	-	Clay A	pilot scale rotary kiln	-	800	00:45:00	-	-	18	-	-	-	-	-	-	-	-	19	-	-	-	-	-	-	-	-	-	2	-	-	-	-	-	-	-	-	-	-	-	-
104	/Dan19/	kaolinitic clay	-	Clay A	pilot scale rotary kiln	-	800	00:45:00	-	-	18	-	-	-	-	-	-	-	-	19	-	-	-	-	-	-	-	-	-	2	-	-	-	-	-	-	-	-	-	-	-	-
105	/Dan19/	kaolinitic clay	-	Clay A	pilot scale rotary kiln	-	800	00:45:00	-	-	18	-	-	-	-	-	-	-	-	19	-	-	-	-	-	-	-	-	-	2	-	-	-	-	-	-	-	-	-	-	-	-
106	/Dan19/	smectitic marl	-	Clay B	pilot scale rotary kiln	-	800	00:45:00	-	-	71	-	-	-	-	-	-	-	-	15	-	-	-	-	-	-	-	-	-	2	-	-	-	-	-	-	-	-	-	-	-	-
107	/Dan19/	smectitic marl	-	Clay B	pilot scale rotary kiln	-	800	00:45:00	-	-	71	-	-	-	-	-	-	-	-	15	-	-	-	-	-	-	-	-	-	2	-	-	-	-	-	-	-	-	-	-	-	-
108	/Dan19/	smectitic marl	-	Clay B	pilot scale rotary kiln	-	800	00:45:00	-	-	71	-	-	-	-	-	-	-	-	15	-	-	-	-	-	-	-	-	-	2	-	-	-	-	-	-	-	-	-	-	-	-
109	/Dan18/	kaolinitic clay	-	Clay A	pilot scale rotary kiln	-	700	00:45:00	-	-	18	-	-	-	-	-	-	-	-	20	-	-	-	-	-	-	-	-	-	-	-	-	-	-	-	-	-	-	-	-	-	-
110	/Dan18/	kaolinitic clay	-	Clay A	pilot scale rotary kiln	-	725	00:45:00	-	-	18	-	-	-	-	-	-	-	-	-	-	-	-	-	-	-	-	-	-	-	-	-	-	-	-	-	-	-	-	-	-	-
111	/Dan18/	kaolinitic clay	-	Clay A	pilot scale rotary kiln	-	750	00:45:00	-	-	18	-	-	-	-	-	-	-	-	-	-	-	-	-	-	-	-	-	-	-	-	-	-	-	-	-	-	-	-	-	-	-
112	/Dan18/	kaolinitic clay	-	Clay A	pilot scale rotary kiln	-	775	00:45:00	-	-	18	-	-	-	-	-	-	-	-	-	-	-	-	-	-	-	-	-	-	-	-	-	-	-	-	-	-	-	-	-	-	-
113	/Dan18/	kaolinitic clay	-	Clay A	pilot scale rotary kiln	-	800	00:45:00	-	-	18	-	-	-	-	-	-	-	-	19	-	-	-	-	-	-	-	-	-	-	-	-	-	-	-	-	-	-	-	-	-	-
114	/Dan18/	smectitic marl	-	Clay B	pilot scale rotary kiln	-	700	00:45:00	-	-	71	-	-	-	-	-	-	-	-	54	-	-	-	-	-	-	-	-	-	-	-	-	-	-	-	-	-	-	-	-	-	-
115	/Dan18/	smectitic marl	-	Clay B	pilot scale rotary kiln	-	750	00:45:00	-	-	71	-	-	-	-	-	-	-	-	-	-	-	-	-	-	-	-	-	-	-	-	-	-	-	-	-	-	-	-	-	-	-
116	/Dan18/	smectitic marl	-	Clay B	pilot scale rotary kiln	-	800	00:45:00	-	-	71	-	-	-	-	-	-	-	-	15	-	-	-	-	-	-	-	-	-	-	-	-	-	-	-	-	-	-	-	-	-	-
117	/Dan18/	smectitic marl	-	Clay B	pilot scale rotary kiln	-	850	00:45:00	-	-	71	-	-	-	-	-	-	-	-	-	-	-	-	-	-	-	-	-	-	-	-	-	-	-	-	-	-	-	-	-	-	-
118	/Dan18/	smectitic marl	-	Clay B	pilot scale rotary kiln	-	900	00:45:00	-	-	71	-	-	-	-	-	-	-	-	-	-	-	-	-	-	-	-	-	-	-	-	-	-	-	-	-	-	-	-	-	-	-
119	/Dan18/	smectitic marl	-	Clay B	pilot scale rotary kiln	-	950	00:45:00	-	-	71	-	-	-	-	-	-	-	-	-	-	-	-	-	-	-	-	-	-	-	-	-	-	-	-	-	-	-	-	-	-	-
120	/Dan18/	smectitic marl	-	Clay B	pilot scale rotary kiln	-	1000	00:45:00	-	-	71	-	-	-	-	-	-	-	-	-	-	-	-	-	-	-	-	-	-	-	-	-	-	-	-	-	-	-	-	-	-	-
121	/Mer20/	illitic shale	-	MI1	-	-	950	-	-	-	-	-	-	-	-	-	-	2630	6220	-	-	8.76	-	-	-	-	-	3100	3540	-	-	19.65	-	-	-	-	-	-	-	-	-	-
122	/Mer20/	illitic shale	-	MI1	-	-	950	-	-	-	-	-	-	-	-	-	-	2630	6220	-	-	8.76	-	-	-	-	-	3100	3540	-	-	19.65	-	-	-	-	-	-	-	-	-	-
123	/Mer20/	illitic shale	-	MI1	-	-	950	-	-	-	-	-	-	-	-	-	-	2630	6220	-	-	8.76	-	-	-	-	-	3100	3540	-	-	19.65	-	-	-	-	-	-	-	-	-	-
124	/Mer20/	illitic shale	-	MI2	-	-	950	-	-	-	-	-	-	-	-	-	-	2720	5070	-	-	12.74	-	-	-	-	-	3100	3540	-	-	19.65	-	-	-	-	-	-	-	-	-	-
125	/Mer20/	illitic shale	-	MI2	-	-	950	-	-	-	-	-	-	-	-	-	-	2720	5070	-	-	12.74	-	-	-	-	-	3100	3540	-	-	19.65	-	-	-	-	-	-	-	-	-	-
126	/Mer20/	illitic shale	-	MI2	-	-	950	-	-	-	-	-	-	-	-	-	-	2720	5070	-	-	12.74	-	-	-	-	-	3100	3540	-	-	19.65	-	-	-	-	-	-	-	-	-	-
127	/Jaf20/	smectitic-kaolinitic clay	-	CC	-	-	750	03:00:00	2730	-	25.0477	1.46	8.89	44.3	-	-	-	-	-	-	-	-	-	-	-	-	-	-	-	-	-	-	-	-	-	-	-	-	-	-	-	-
128	/Msi20/	illitic clay	Germany	I1	laboratory-scale rotary	-	850	-	2580	-	16.47	-	13.29	-	-	-	-	-	-	-	-	-	-	-	-	-	-	3200	-	1.07		4.87	-	-	-	-	-	-	-	-	-	-
129	/Msi20/	illitic clay	Germany	I1	laboratory-scale rotary	-	900	-	2580	-	16.47	-	13.29	-	-	-	-	-	-	-	-	-	-	-	-	-	-	-	-	-	-	-	-	-	-	-	-	-	-	-	-	-
130	/Msi20/	illitic clay	Germany	I2	laboratory-scale rotary	-	850	-	2660	-	15.5	-	20.48	-	-	-	-	-	-	-	-	-	-	-	-	-	-	-	-	-	-	-	-	-	-	-	-	-	-	-	-	-
131	/Msi20/	illitic clay	Germany	I2	laboratory-scale rotary	-	900	-	2660	-	15.5	-	20.48	-	-	-	-	-	-	-	-	-	-	-	-	-	-	-	-	-	-	-	-	-	-	-	-	-	-	-	-	-
132	/Msi20/	kaolinitic clay	Germany	K1	laboratory-scale rotary	-	650	-	2540	-	35.64	-	10.7	-	-	-	-	-	-	-	-	-	-	-	-	-	-	-	-	-	-	-	-	-	-	-	-	-	-	-	-	-
133	/Msi20/	kaolinitic clay	Germany	K1	laboratory-scale rotary	-	900	-	2540	-	35.64	-	10.7	-	-	-	-	-	-	-	-	-	-	-	-	-	-	-	-	-	-	-	-	-	-	-	-	-	-	-	-	-
134	/Msi20/	illitic-kaolinitic clay	Germany	B1	laboratory-scale rotary	-	650	-	2560	-	26.055	-	11.995	-	-	-	-	-	-	-	-	-	-	-	-	-	-	-	-	-	-	-	-	-	-	-	-	-	-	-	-	-
135	/Msi20/	illitic-kaolinitic clay	Germany	B1	laboratory-scale rotary	-	900	-	2560	-	26.055	-	11.995	-	-	-	-	-	-	-	-	-	-	-	-	-	-	-	-	-	-	-	-	-	-	-	-	-	-	-	-	-
136	/Dan20/	smectitic clay	Germany?	Sm	pilot scale rotary kiln	-	800	00:45:00	-	-	21	-	-	-	-	-	-	-	-	30	-	-	-	-	-	-	-	-	-	-	-	-	-	-	-	-	-	-	-	-	-	-
137	/Dan20/	smectitic clay	Germany?	Sm-Ca	pilot scale rotary kiln	-	800	00:45:00	-	-	71	-	-	-	-	-	-	-	-	15	-	-	-	-	-	-	-	-	-	-	-	-	-	-	-	-	-	-	-	-	-	-
138	/Dan20/	illitic clay	Germany?	Ill	pilot scale rotary kiln	-	800	00:45:00	-	-	41	-	-	-	-	-	-	-	-	23	-	-	-	-	-	-	-	-	-	-	-	-	-	-	-	-	-	-	-	-	-	-
139	/Dan20/	illitic clay	Germany?	Ill-Ca	pilot scale rotary kiln	-	800	00:45:00	-	-	48	-	-	-	-	-	-	-	-	9	-	-	-	-	-	-	-	-	-	-	-	-	-	-	-	-	-	-	-	-	-	-
140	/Ira19a/	illitic shale	Argentina	LUT	laboratory furnace	-	900	-	-	-	-	-	-	-	-	-	-	2690	6780	-	51.2	8.6	1.5	-	-	-	-	-	3370	-	2.7	18.3	58.6	-	-	-	-	-	-	-	-	-
141	/Ira19a/	illitic shale	Argentina	LUT	laboratory furnace	-	1000	-	-	-	-	-	-	-	-	-	-	2760	5250	-	40.8	11.8	2.1	-	-	-	-	-	3370	-	2.7	18.3	58.6	-	-	-	-	-	-	-	-	-
142	/Ira19a/	illitic shale	Argentina	LUT	laboratory furnace	-	1100	-	-	-	-	-	-	-	-	-	-	2720	5390	-	33.8	10.1	2	-	-	-	-	-	3370	-	2.7	18.3	58.6	-	-	-	-	-	-	-	-	-
143	/Ira19a/	illitic shale	Argentina	HET	laboratory furnace	-	900	-	-	-	-	-	-	-	-	-	-	2690	6460	-	35	7.4	1.6	-	-	-	-	-	3370	-	2.7	18.3	58.6	-	-	-	-	-	-	-	-	-
144	/Ira19a/	illitic shale	Argentina	HET	laboratory furnace	-	1000	-	-	-	-	-	-	-	-	-	-	2790	5190	-	41.7	10.3	2	-	-	-	-	-	3370	-	2.7	18.3	58.6	-	-	-	-	-	-	-	-	-
145	/Ira19a/	illitic shale	Argentina	HET	laboratory furnace	-	1100	-	-	-	-	-	-	-	-	-	-	2660	5070	-	38	10.9	2.2	-	-	-	-	-	3370	-	2.7	18.3	58.6	-	-	-	-	-	-	-	-	-
146	/Ira19b/	illitic shale	Argentina	IC01	laboratory furnace	-	950	-	2720	-	-	-	-	-	-	-	-	2690	5110	-	2.2	11.4	40.5	-	-	-	-	-	-	-	-	-	-	-	-	-	-	-	-	-	-	-
147	/Ira19b/	illitic shale	Argentina	IC02	laboratory furnace	-	950	-	2720	-	-	-	-	-	-	-	-	2760	5070	-	2.2	12.1	43	-	-	-	-	-	-	-	-	-	-	-	-	-	-	-	-	-	-	-
148	/Ira19b/	illitic shale	Argentina	IC03	laboratory furnace	-	950	-	2800	-	-	-	-	-	-	-	-	2760	5790	-	1.8	9.4	30.7	-	-	-	-	-	-	-	-	-	-	-	-	-	-	-	-	-	-	-
149	/Ira19b/	illitic shale	Argentina	IC04	laboratory furnace	-	950	-	2570	-	-	-	-	-	-	-	-	2810	6360	-	1.9	9.9	36.6	-	-	-	-	-	-	-	-	-	-	-	-	-	-	-	-	-	-	-
150	/Ira19b/	illitic shale	Argentina	IC05	laboratory furnace	-	950	-	2490	-	-	-	-	-	-	-	-	2670	7270	-	1.7	9.2	35.9	-	-	-	-	-	-	-	-	-	-	-	-	-	-	-	-	-	-	-
151	/Ira19b/	illitic shale	Argentina	IC06	laboratory furnace	-	950	-	2950	-	-	-	-	-	-	-	-	2690	5520	-	1.3	7.4	35.6	-	-	-	-	-	-	-	-	-	-	-	-	-	-	-	-	-	-	-
152	/Ira19b/	kaolinitic shale	Argentina	KC01	laboratory furnace	-	600	-	2640	-	-	-	-	-	-	-	-	2790	7590	-	1.5	5.6	32.3	-	-	-	-	-	-	-	-	-	-	-	-	-	-	-	-	-	-	-
153	/Ira19b/	kaolinitic shale	Argentina	KC02	laboratory furnace	-	600	-	2720	-	-	-	-	-	-	-	-	2640	6430	-	1.6	9.7	38.3	-	-	-	-	-	-	-	-	-	-	-	-	-	-	-	-	-	-	-
154	/Moh16/	illitic marl	Algeria	CM 500°C-5h	laboratory furnace	-	500	05:00	2560	3630	-	-	-	-	-	-	-	-	-	-	-	-	-	-	-	-	-	3100	3250	-	-	-	-	-	-	-	-	-	-	-	-	-
155	/Moh16/	illitic marl	Algeria	CM 600°C-2h	laboratory furnace	-	600	02:00	2560	3630	-	-	-	-	-	-	-	-	-	-	-	-	-	-	-	-	-	-	-	-	-	-	-	-	-	-	-	-	-	-	-	-
156	/Moh16/	illitic marl	Algeria	CM 600°C-3h	laboratory furnace	-	600	03:00	2560	3630	-	-	-	-	-	-	-	-	-	-	-	-	-	-	-	-	-	-	-	-	-	-	-	-	-	-	-	-	-	-	-	-
157	/Moh16/	illitic marl	Algeria	CM 600°C-5h	laboratory furnace	-	600	05:00	2560	3630	-	-	-	-	-	-	-	-	-	-	-	-	-	-	-	-	-	-	-	-	-	-	-	-	-	-	-	-	-	-	-	-
158	/Moh16/	illitic marl	Algeria	CM 700°C-2h	laboratory furnace	-	700	02:00	2560	3630	-	-	-	-	-	-	-	-	-	-	-	-	-	-	-	-	-	-	-	-	-	-	-	-	-	-	-	-	-	-	-	-
159	/Moh16/	illitic marl	Algeria	CM 700°C-3h	laboratory furnace	-	700	03:00	2560	3630	-	-	-	-	-	-	-	-	-	-	-	-	-	-	-	-	-	-	-	-	-	-	-	-	-	-	-	-	-	-	-	-
160	/Moh16/	illitic marl	Algeria	CM 700°C-5h	laboratory furnace	-	700	05:00	2560	3630	-	-	-	-	-	-	-	-	-	-	-	-	-	-	-	-	-	-	-	-	-	-	-	-	-	-	-	-	-	-	-	-
161	/Moh16/	illitic marl	Algeria	CM 800°C-2h	laboratory furnace	-	800	02:00	2560	3630	-	-	-	-	-	-	-	-	-	-	-	-	-	-	-	-	-	-	-	-	-	-	-	-	-	-	-	-	-	-	-	-
162	/Moh16/	illitic marl	Algeria	CM 800°C-3h	laboratory furnace	-	800	03:00	2560	3630	-	-	-	-	-	-	-	-	-	-	-	-	-	-	-	-	-	-	-	-	-	-	-	-	-	-	-	-	-	-	-	-
163	/Moh16/	illitic marl	Algeria	CM 800°C-5h	laboratory furnace	-	800	05:00	2560	3630	-	-	-	-	-	-	-	-	-	-	-	-	-	-	-	-	-	-	-	-	-	-	-	-	-	-	-	-	-	-	-	-
164	/Moh16/	illitic marl	Algeria	CM 1000°C-2h	laboratory furnace	-	1000	02:00	2560	3630	-	-	-	-	-	-	-	-	-	-	-	-	-	-	-	-	-	-	-	-	-	-	-	-	-	-	-	-	-	-	-	-
165	/Tay15/	kaolin	USA	K	laboratory furnace	-	650	01:00	-	-	21.1	-	20.7	-	-	-	-	-	-	-	-	-	-	-	-	-	-	-	-	-	-	9.8	-	-	-	-	-	-	-	-	-	-
166	/Tay15/	kaolinite-calcium bentonite	USA	KCaB	laboratory furnace	-	930	01:00	-	-	34.9	-	20.2	-	-	-	-	-	-	-	-	-	-	-	-	-	-	-	-	-	-	-	-	-	-	-	-	-	-	-	-	-
167	/Tay15/	kaolinite-sodium bentonite	USA	KNaB	laboratory furnace	-	830	01:00	-	-	25.4	-	30	-	-	-	-	-	-	-	-	-	-	-	-	-	-	-	-	-	-	-	-	-	-	-	-	-	-	-	-	-
168	/Tir14/	kaolinitic clay	Argentina	MK1	laboratory furnace	< 4 mm	700	-	-	-	-	-	-	-	-	-	-	-	14610	-	-	-	-	-	-	-	-	-	3830	-	-	-	-	-	-	-	-	-	-	-	-	-
169	/Tir14/	kaolinitic clay	Argentina	MK2	laboratory furnace	< 4 mm	700	-	-	-	-	-	-	-	-	-	-	-	22870	-	-	-	-	-	-	-	-	-	3830	-	-	-	-	-	-	-	-	-	-	-	-	-
170	/Tir14/	kaolinitic clay	Argentina	MK3	laboratory furnace	< 4 mm	700	-	-	-	-	-	-	-	-	-	-	-	18650	-	-	-	-	-	-	-	-	-	3830	-	-	-	-	-	-	-	-	-	-	-	-	-
171	/Tir14/	kaolinitic clay	Argentina	MK4	laboratory furnace	< 4 mm	700	-	-	-	-	-	-	-	-	-	-	-	9810	-	-	-	-	-	-	-	-	-	3830	-	-	-	-	-	-	-	-	-	-	-	-	-
172	/Tir14/	kaolinitic-illitic clay	Argentina	MK5	laboratory furnace	< 4 mm	700	-	-	-	-	-	-	-	-	-	-	-	13990	-	-	-	-	-	-	-	-	-	3830	-	-	-	-	-	-	-	-	-	-	-	-	-
173	/Aka15/	kaolinitic clay	Lybia	Sebha (A)	-	6.35-12.7 mm	800	02:00	-	-	-	-	-	-	-	-	-	-	-	-	-	-	-	-	-	-	-	-	-	-	-	-	-	-	-	-	-	-	-	-	-	-
174	/Aka15/	kaolinitic clay	Lybia	Sebha (A)	-	6.35-12.7 mm	800	02:00	-	-	-	-	-	-	-	-	-	-	-	-	-	-	-	-	-	-	-	-	-	-	-	-	-	-	-	-	-	-	-	-	-	-
175	/Aka15/	kaolinitic clay	Lybia	Sebha (A)	-	6.35-12.7 mm	800	02:00	-	-	-	-	-	-	-	-	-	-	-	-	-	-	-	-	-	-	-	-	-	-	-	-	-	-	-	-	-	-	-	-	-	-
176	/Aka15/	kaolinitic clay	Lybia	Temenhint (B)	-	6.35-12.7 mm	800	02:00	-	-	-	-	-	-	-	-	-	-	-	-	-	-	-	-	-	-	-	-	-	-	-	-	-	-	-	-	-	-	-	-	-	-
177	/Aka15/	kaolinitic clay	Lybia	Temenhint (B)	-	6.35-12.7 mm	800	02:00	-	-	-	-	-	-	-	-	-	-	-	-	-	-	-	-	-	-	-	-	-	-	-	-	-	-	-	-	-	-	-	-	-	-
178	/Aka15/	kaolinitic clay	Lybia	Temenhint (B)	-	6.35-12.7 mm	800	02:00	-	-	-	-	-	-	-	-	-	-	-	-	-	-	-	-	-	-	-	-	-	-	-	-	-	-	-	-	-	-	-	-	-	-
179	/Aka15/	kaolinitic clay	Lybia	Alafya (′C)	-	6.35-12.7 mm	800	02:00	-	-	-	-	-	-	-	-	-	-	-	-	-	-	-	-	-	-	-	-	-	-	-	-	-	-	-	-	-	-	-	-	-	-
180	/Aka15/	kaolinitic clay	Lybia	Alafya (′C)	-	6.35-12.7 mm	800	02:00	-	-	-	-	-	-	-	-	-	-	-	-	-	-	-	-	-	-	-	-	-	-	-	-	-	-	-	-	-	-	-	-	-	-
181	/Aka15/	kaolinitic clay	Lybia	Alafya (′C)	-	6.35-12.7 mm	800	02:00	-	-	-	-	-	-	-	-	-	-	-	-	-	-	-	-	-	-	-	-	-	-	-	-	-	-	-	-	-	-	-	-	-	-
182	/Aka15/	kaolinitic clay	Lybia	Agar (D)	-	6.35-12.7 mm	800	02:00	-	-	-	-	-	-	-	-	-	-	-	-	-	-	-	-	-	-	-	-	-	-	-	-	-	-	-	-	-	-	-	-	-	-
183	/Aka15/	kaolinitic clay	Lybia	Agar (D)	-	6.35-12.7 mm	800	02:00	-	-	-	-	-	-	-	-	-	-	-	-	-	-	-	-	-	-	-	-	-	-	-	-	-	-	-	-	-	-	-	-	-	-
184	/Aka15/	kaolinitic clay	Lybia	Agar (D)	-	6.35-12.7 mm	800	02:00	-	-	-	-	-	-	-	-	-	-	-	-	-	-	-	-	-	-	-	-	-	-	-	-	-	-	-	-	-	-	-	-	-	-
185	/Aka15/	kaolinitic clay	Lybia	Tarout (E)	-	6.35-12.7 mm	800	02:00	-	-	-	-	-	-	-	-	-	-	-	-	-	-	-	-	-	-	-	-	-	-	-	-	-	-	-	-	-	-	-	-	-	-
186	/Aka15/	kaolinitic clay	Lybia	Tarout (E)	-	6.35-12.7 mm	800	02:00	-	-	-	-	-	-	-	-	-	-	-	-	-	-	-	-	-	-	-	-	-	-	-	-	-	-	-	-	-	-	-	-	-	-
187	/Aka15/	kaolinitic clay	Lybia	Tarout (E)	-	6.35-12.7 mm	800	02:00	-	-	-	-	-	-	-	-	-	-	-	-	-	-	-	-	-	-	-	-	-	-	-	-	-	-	-	-	-	-	-	-	-	-
188	/Tre18/	kaolinitic clay	Argentina	PK1	-	-	600	-	2540	8790	-	-	-	-	-	-	-	-	-	-	-	-	-	-	-	-	-	-	-	-	-	-	-	-	-	-	-	-	-	-	-	-
189	/Tre18/	kaolinitic clay	Argentina	PK2	-	-	600	-	2490	8790	-	-	-	-	-	-	-	-	-	-	-	-	-	-	-	-	-	-	-	-	-	-	-	-	-	-	-	-	-	-	-	-
190	/Hue18/	illitic-kaolinitic	-	PL1	pilot scale rotary kiln	-	600	-	-	-	-	-	-	-	-	-	-	-	-	-	-	-	-	-	-	-	-	-	-	-	-	-	-	-	-	-	-	-	-	-	-	-
191	/Hue18/	illitic-kaolinitic	-	PL1	pilot scale rotary kiln	-	650	-	-	-	-	-	-	-	-	-	-	-	-	-	-	-	-	-	-	-	-	-	-	-	-	-	-	-	-	-	-	-	-	-	-	-
192	/Hue18/	illitic-kaolinitic	-	PL1	pilot scale rotary kiln	-	700	-	-	-	-	-	-	-	-	-	-	-	-	-	-	-	-	-	-	-	-	-	-	-	-	-	-	-	-	-	-	-	-	-	-	-
193	/Hue18/	kaolinitic-illitic clay	-	PL2	pilot scale rotary kiln	-	600	-	-	-	-	-	-	-	-	-	-	-	-	-	-	-	-	-	-	-	-	-	-	-	-	-	-	-	-	-	-	-	-	-	-	-
194	/Hue18/	kaolinitic-illitic clay	-	PL2	pilot scale rotary kiln	-	650	-	-	-	-	-	-	-	-	-	-	-	-	-	-	-	-	-	-	-	-	-	-	-	-	-	-	-	-	-	-	-	-	-	-	-
195	/Hue18/	kaolinitic-illitic clay	-	PL2	pilot scale rotary kiln	-	700	-	-	-	-	-	-	-	-	-	-	-	-	-	-	-	-	-	-	-	-	-	-	-	-	-	-	-	-	-	-	-	-	-	-	-
196	/Hue18/	kaolinitic clay	-	PL7	pilot scale rotary kiln	-	600	-	-	-	-	-	-	-	-	-	-	-	-	-	-	-	-	-	-	-	-	-	-	-	-	-	-	-	-	-	-	-	-	-	-	-
197	/Hue18/	kaolinitic clay	-	PL7	pilot scale rotary kiln	-	650	-	-	-	-	-	-	-	-	-	-	-	-	-	-	-	-	-	-	-	-	-	-	-	-	-	-	-	-	-	-	-	-	-	-	-
198	/Hue18/	kaolinitic clay	-	PL7	pilot scale rotary kiln	-	700	-	-	-	-	-	-	-	-	-	-	-	-	-	-	-	-	-	-	-	-	-	-	-	-	-	-	-	-	-	-	-	-	-	-	-
199	/Hue18/	kaolinitic-illitic clay	-	PL1_80_PL7_20	pilot scale rotary kiln	-	600	-	-	-	-	-	-	-	-	-	-	-	-	-	-	-	-	-	-	-	-	-	-	-	-	-	-	-	-	-	-	-	-	-	-	-
200	/Hue18/	kaolinitic-illitic clay	-	PL1_80_PL7_20	pilot scale rotary kiln	-	650	-	-	-	-	-	-	-	-	-	-	-	-	-	-	-	-	-	-	-	-	-	-	-	-	-	-	-	-	-	-	-	-	-	-	-
201	/Hue18/	kaolinitic-illitic clay	-	PL1_80_PL7_20	pilot scale rotary kiln	-	700	-	-	-	-	-	-	-	-	-	-	-	-	-	-	-	-	-	-	-	-	-	-	-	-	-	-	-	-	-	-	-	-	-	-	-
202	/Hue18/	kaolinitic-illitic clay	-	PL1_60_PL7_40	pilot scale rotary kiln	-	600	-	-	-	-	-	-	-	-	-	-	-	-	-	-	-	-	-	-	-	-	-	-	-	-	-	-	-	-	-	-	-	-	-	-	-
203	/Hue18/	kaolinitic-illitic clay	-	PL1_60_PL7_40	pilot scale rotary kiln	-	650	-	-	-	-	-	-	-	-	-	-	-	-	-	-	-	-	-	-	-	-	-	-	-	-	-	-	-	-	-	-	-	-	-	-	-
204	/Hue18/	kaolinitic-illitic clay	-	PL1_60_PL7_40	pilot scale rotary kiln	-	700	-	-	-	-	-	-	-	-	-	-	-	-	-	-	-	-	-	-	-	-	-	-	-	-	-	-	-	-	-	-	-	-	-	-	-
205	/Hue18/	kaolinitic-illitic clay	-	PL1_40_PL7_60	pilot scale rotary kiln	-	600	-	-	-	-	-	-	-	-	-	-	-	-	-	-	-	-	-	-	-	-	-	-	-	-	-	-	-	-	-	-	-	-	-	-	-
206	/Hue18/	kaolinitic-illitic clay	-	PL1_40_PL7_60	pilot scale rotary kiln	-	650	-	-	-	-	-	-	-	-	-	-	-	-	-	-	-	-	-	-	-	-	-	-	-	-	-	-	-	-	-	-	-	-	-	-	-
207	/Hue18/	kaolinitic-illitic clay	-	PL1_40_PL7_60	pilot scale rotary kiln	-	700	-	-	-	-	-	-	-	-	-	-	-	-	-	-	-	-	-	-	-	-	-	-	-	-	-	-	-	-	-	-	-	-	-	-	-
208	/Hue18/	kaolinitic-illitic clay	-	PL1_20_PL7_80	pilot scale rotary kiln	-	600	-	-	-	-	-	-	-	-	-	-	-	-	-	-	-	-	-	-	-	-	-	-	-	-	-	-	-	-	-	-	-	-	-	-	-
209	/Hue18/	kaolinitic-illitic clay	-	PL1_20_PL7_80	pilot scale rotary kiln	-	650	-	-	-	-	-	-	-	-	-	-	-	-	-	-	-	-	-	-	-	-	-	-	-	-	-	-	-	-	-	-	-	-	-	-	-
210	/Hue18/	kaolinitic-illitic clay	-	PL1_20_PL7_80	pilot scale rotary kiln	-	700	-	-	-	-	-	-	-	-	-	-	-	-	-	-	-	-	-	-	-	-	-	-	-	-	-	-	-	-	-	-	-	-	-	-	-
211	/Hue18/	kaolinitic-illitic clay	-	PL2_80_PL7_20	pilot scale rotary kiln	-	600	-	-	-	-	-	-	-	-	-	-	-	-	-	-	-	-	-	-	-	-	-	-	-	-	-	-	-	-	-	-	-	-	-	-	-
212	/Hue18/	kaolinitic-illitic clay	-	PL2_80_PL7_20	pilot scale rotary kiln	-	650	-	-	-	-	-	-	-	-	-	-	-	-	-	-	-	-	-	-	-	-	-	-	-	-	-	-	-	-	-	-	-	-	-	-	-
213	/Hue18/	kaolinitic-illitic clay	-	PL2_80_PL7_20	pilot scale rotary kiln	-	700	-	-	-	-	-	-	-	-	-	-	-	-	-	-	-	-	-	-	-	-	-	-	-	-	-	-	-	-	-	-	-	-	-	-	-
214	/Hue18/	kaolinitic-illitic clay	-	PL2_60_PL7_40	pilot scale rotary kiln	-	600	-	-	-	-	-	-	-	-	-	-	-	-	-	-	-	-	-	-	-	-	-	-	-	-	-	-	-	-	-	-	-	-	-	-	-
215	/Hue18/	kaolinitic-illitic clay	-	PL2_60_PL7_40	pilot scale rotary kiln	-	650	-	-	-	-	-	-	-	-	-	-	-	-	-	-	-	-	-	-	-	-	-	-	-	-	-	-	-	-	-	-	-	-	-	-	-
216	/Hue18/	kaolinitic-illitic clay	-	PL2_60_PL7_40	pilot scale rotary kiln	-	700	-	-	-	-	-	-	-	-	-	-	-	-	-	-	-	-	-	-	-	-	-	-	-	-	-	-	-	-	-	-	-	-	-	-	-
217	/Hue18/	kaolinitic-illitic clay	-	PL2_40_PL7_60	pilot scale rotary kiln	-	600	-	-	-	-	-	-	-	-	-	-	-	-	-	-	-	-	-	-	-	-	-	-	-	-	-	-	-	-	-	-	-	-	-	-	-
218	/Hue18/	kaolinitic-illitic clay	-	PL2_40_PL7_60	pilot scale rotary kiln	-	650	-	-	-	-	-	-	-	-	-	-	-	-	-	-	-	-	-	-	-	-	-	-	-	-	-	-	-	-	-	-	-	-	-	-	-
219	/Hue18/	kaolinitic-illitic clay	-	PL2_40_PL7_60	pilot scale rotary kiln	-	700	-	-	-	-	-	-	-	-	-	-	-	-	-	-	-	-	-	-	-	-	-	-	-	-	-	-	-	-	-	-	-	-	-	-	-
220	/Hue18/	kaolinitic-illitic clay	-	PL2_20_PL7_80	pilot scale rotary kiln	-	600	-	-	-	-	-	-	-	-	-	-	-	-	-	-	-	-	-	-	-	-	-	-	-	-	-	-	-	-	-	-	-	-	-	-	-
221	/Hue18/	kaolinitic-illitic clay	-	PL2_20_PL7_80	pilot scale rotary kiln	-	650	-	-	-	-	-	-	-	-	-	-	-	-	-	-	-	-	-	-	-	-	-	-	-	-	-	-	-	-	-	-	-	-	-	-	-
222	/Hue18/	kaolinitic-illitic clay	-	PL2_20_PL7_80	pilot scale rotary kiln	-	700	-	-	-	-	-	-	-	-	-	-	-	-	-	-	-	-	-	-	-	-	-	-	-	-	-	-	-	-	-	-	-	-	-	-	-
223	/Lem18/	illitic clay	Argentina	L	-	-	900	-	-	-	-	-	-	-	-	-	-	-	-	0.678	-	-	-	-	-	-	-	-	3370	-	-	-	-	-	-	-	-	-	-	-	-	-
224	/Lem18/	illitic clay	Argentina	L	-	-	1000	-	-	-	-	-	-	-	-	-	-	-	-	0.525	-	-	-	-	-	-	-	-	3370	-	-	-	-	-	-	-	-	-	-	-	-	-
225	/Lem18/	illitic clay	Argentina	L	-	-	1100	-	-	-	-	-	-	-	-	-	-	-	-	0.529	-	-	-	-	-	-	-	-	3370	-	-	-	-	-	-	-	-	-	-	-	-	-
226	/Fri10/	kaolinitic paper sludge	-	CPS	-	-	650	02:00	-	-	-	-	-	-	-	-	-	-	-		-	-	-	-	-	-	-	-	-	-	-	-	-	-	-	-	-	-	-	-	-	-
227	/Gon09/	calcined-clay brick	-	GB	-	-	850	-	-	-	-	-	-	-	-	-	-	2650	-	19	-	20	-	-	-	-	-	3100	-	-	-	20	-	-	-	-	-	-	-	-	-	-
228	/Gon09/	calcined-clay brick	-	GB	-	-	850	-	-	-	-	-	-	-	-	-	-	2650	-	19	-	20	-	-	-	-	-	3100	-	-	-	20	-	-	-	-	-	-	-	-	-	-
229	/Gon09/	calcined-clay brick	-	GB	-	-	850	-	-	-	-	-	-	-	-	-	-	2650	-	19	-	20	-	-	-	-	-	3100	-	-	-	20	-	-	-	-	-	-	-	-	-	-
230	/Gon09/	calcined-clay brick	-	GB	-	-	850	-	-	-	-	-	-	-	-	-	-	2650	-	19	-	20	-	-	-	-	-	3100	-	-	-	20	-	-	-	-	-	-	-	-	-	-
231	/Gon09/	metakaolin	-	Mk1	-	-	-	-	-	-	-	-	-	-	-	-	-	2650	-	22.6	-	3	-	-	-	-	-	3100	-	-	-	20	-	-	-	-	-	-	-	-	-	-
232	/Gon09/	metakaolin	-	Mk1	-	-	-	-	-	-	-	-	-	-	-	-	-	2650	-	22.6	-	3	-	-	-	-	-	3100	-	-	-	20	-	-	-	-	-	-	-	-	-	-
233	/Gon09/	metakaolin	-	Mk1	-	-	-	-	-	-	-	-	-	-	-	-	-	2650	-	22.6	-	3	-	-	-	-	-	3100	-	-	-	20	-	-	-	-	-	-	-	-	-	-
234	/Gon09/	metakaolin	-	Mk1	-	-	-	-	-	-	-	-	-	-	-	-	-	2650	-	22.6	-	3	-	-	-	-	-	3100	-	-	-	20	-	-	-	-	-	-	-	-	-	-
235	/Gon09/	metakaolin	-	Mk2	-	-	550	02:00	-	-	-	-	-	-	-	-	-	2570	-	40.7	-	~ 1	-	-	-	-	-	3100	-	-	-	20	-	-	-	-	-	-	-	-	-	-
236	/Gon09/	metakaolin	-	Mk2	-	-	550	02:00	-	-	-	-	-	-	-	-	-	2570	-	40.7	-	~ 1	-	-	-	-	-	3100	-	-	-	20	-	-	-	-	-	-	-	-	-	-
237	/Gon09/	metakaolin	-	Mk2	-	-	550	02:00	-	-	-	-	-	-	-	-	-	2570	-	40.7	-	~ 1	-	-	-	-	-	3100	-	-	-	20	-	-	-	-	-	-	-	-	-	-
238	/Gon09/	metakaolin	-	Mk2	-	-	550	02:00	-	-	-	-	-	-	-	-	-	2570	-	40.7	-	~ 1	-	-	-	-	-	3100	-	-	-	20	-	-	-	-	-	-	-	-	-	-
239	/Gut08/	metakaolin	Colombia	MKN	-	-	600	-	-	-	-	-	-	-	-	-	-	-	-	-	-	-	-	-	-	-	-	-	4200	-	-	-	-	-	-	-	-	-	-	-	-	-
240	/Gut08/	metakaolin	Colombia	MKN	-	-	800	-	-	-	-	-	-	-	-	-	-	-	-	-	-	-	-	-	-	-	-	-	4200	-	-	-	-	-	-	-	-	-	-	-	-	-
241	/Fri08/	kaolinitic paper sludge	-	CCW	-	-	700-800 °C	02:00	-	-	-	-	-	-	-	-	-	-	-	-	-	-	-	-	-	-	-	-	-	-	-	-	-	-	-	-	-	-	-	-	-	-
242	/O'Fa06/	illitic-kaolinitic clay	-	HTC QC	-	-	800 °C	02:00	-	-	-	-	-	-	-	-	-	-	3200-3500	-	-	-	-	-	-	-	-	-	3500-5000	-	-	-	-	-	-	-	-	-	-	-	-	-
243	/O'Fa06/	illitic-kaolinitic clay	-	HTC QC	-	-	800 °C	02:00	-	-	-	-	-	-	-	-	-	-	3200-3500	-	-	-	-	-	-	-	-	-	3500-5000	-	-	-	-	-	-	-	-	-	-	-	-	-
244	/O'Fa06/	illitic-kaolinitic clay	-	HTC QC	-	-	800 °C	02:00	-	-	-	-	-	-	-	-	-	-	3200-3500	-	-	-	-	-	-	-	-	-	3500-5000	-	-	-	-	-	-	-	-	-	-	-	-	-
245	/O'Fa06/	illitic-kaolinitic clay	-	HTC SC	-	-	800 °C	02:00	-	-	-	-	-	-	-	-	-	-	3200-3500	-	-	-	-	-	-	-	-	-	3500-5000	-	-	-	-	-	-	-	-	-	-	-	-	-
246	/O'Fa06/	illitic-kaolinitic clay	-	HTC SC	-	-	800 °C	02:00	-	-	-	-	-	-	-	-	-	-	3200-3500	-	-	-	-	-	-	-	-	-	3500-5000	-	-	-	-	-	-	-	-	-	-	-	-	-
247	/O'Fa06/	illitic-kaolinitic clay	-	HTC SC	-	-	800 °C	02:00	-	-	-	-	-	-	-	-	-	-	3200-3500	-	-	-	-	-	-	-	-	-	3500-5000	-	-	-	-	-	-	-	-	-	-	-	-	-
248	/He96/	Na-montmorillonite	-	NaM	muffle furnace	-	740	01:40	2470	-	26.7	-	-	-	-	-	-	2720	-	13.9	-	-	-	-	-	-	-	-	-	-	-	-	-	-	-	-	-	-	-	-	-	-
249	/He96/	Na-montmorillonite	-	NaM	muffle furnace	-	830	01:40	2470	-	26.7	-	-	-	-	-	-	2550	-	5.4	-	-	-	-	-	-	-	-	-	-	-	-	-	-	-	-	-	-	-	-	-	-
250	/He96/	Na-montmorillonite	-	NaM	muffle furnace	-	920	01:40	2470	-	26.7	-	-	-	-	-	-	2520	-	2.2	-	-	-	-	-	-	-	-	-	-	-	-	-	-	-	-	-	-	-	-	-	-
251	/He96/	Ca-montmorillonite	-	CaM	muffle furnace	-	730	01:40	2330	-	76	-	-	-	-	-	-	2840	-	55.6	-	-	-	-	-	-	-	-	-	-	-	-	-	-	-	-	-	-	-	-	-	-
252	/He96/	Ca-montmorillonite	-	CaM	muffle furnace	-	830	01:40	2330	-	76	-	-	-	-	-	-	2660	-	39.9	-	-	-	-	-	-	-	-	-	-	-	-	-	-	-	-	-	-	-	-	-	-
253	/He96/	Ca-montmorillonite	-	CaM	muffle furnace	-	930	01:40	2330	-	76	-	-	-	-	-	-	2490	-	7.9	-	-	-	-	-	-	-	-	-	-	-	-	-	-	-	-	-	-	-	-	-	-
254	/Bra18/	mixed clay	bulgaria	S	laboratory furnace	< 0.5	800	00:20	-	-	-	-	-	-	-	-	-	-	-	-	-	-	-	-	-	-	-	-	-	-	-	-	-	-	-	-	-	-	-	-	-	-
255	/Bra18/	smectitic-kaolinitic clay	bulgaria	Ch	laboratory furnace	< 0.5	800	00:20	-	-	-	-	-	-	-	-	-	-	-	-	-	-	-	-	-	-	-	-	-	-	-	-	-	-	-	-	-	-	-	-	-	-
256	/Bra18/	smectitic-kaolinitic clay	bulgaria	SK	laboratory furnace	< 0.5	800	00:20	-	-	-	-	-	-	-	-	-	-	-	-	-	-	-	-	-	-	-	-	-	-	-	-	-	-	-	-	-	-	-	-	-	-
257	/Bra18/	smectitic clay	bulgaria	B	laboratory furnace	< 0.5	780	00:20	-	-	-	-	-	-	-	-	-	-	-	-	-	-	-	-	-	-	-	-	-	-	-	-	-	-	-	-	-	-	-	-	-	-
258	/Bra18/	kaolin	bulgaria	K	laboratory furnace	< 0.5	800	00:20	-	-	-	-	-	-	-	-	-	-	-	-	-	-	-	-	-	-	-	-	-	-	-	-	-	-	-	-	-	-	-	-	-	-
259	/Bra18/	mixed clay	bulgaria	M	laboratory furnace	< 0.5	800	00:20	-	-	-	-	-	-	-	-	-	-	-	-	-	-	-	-	-	-	-	-	-	-	-	-	-	-	-	-	-	-	-	-	-	-
260	/Bra18/	mixed clay	bulgaria	D	laboratory furnace	< 0.5	780	00:20	-	-	-	-	-	-	-	-	-	-	-	-	-	-	-	-	-	-	-	-	-	-	-	-	-	-	-	-	-	-	-	-	-	-
261	/Bra18/	illitic-smectitic clay	bulgaria	BB	laboratory furnace	< 0.5	800	00:20	-	-	-	-	-	-	-	-	-	-	-	-	-	-	-	-	-	-	-	-	-	-	-	-	-	-	-	-	-	-	-	-	-	-
262	/Mou01/	kaolinitic clay	-	Sample 1	static laboratory furnace	-	750	02:00	-	-	-	-	-	-	-	-	-	-	-	-	-	-	-	-	-	-	-	-	-	-	-	-	-	-	-	-	-	-	-	-	-	-
263	/Mou01/	kaolinitic clay	-	Sample 2	static laboratory furnace	-	750	02:00	-	-	-	-	-	-	-	-	-	-	-	-	-	-	-	-	-	-	-	-	-	-	-	-	-	-	-	-	-	-	-	-	-	-
264	/Mai20, Mai21/	kaolinitic clay	Germany	KT	muffle furnace	-	800	00:30:00	-	-	44.1	-	-	-	-	-	-	-	-	-	-	-	-	-	-	-	-	-	-	-	-	-	-	-	-	-	-	-	-	-	-	-
265	/Mai20, Mai21/	chloride and mica-rich	Germany	KUP	muffle furnace	-	620	00:30:00	-	-	9.1	-	-	-	-	-	-	-	-	-	-	-	-	-	-	-	-	-	-	-	-	-	-	-	-	-	-	-	-	-	-	-
266	/Mai20, Mai21/	smectitic mixed clay	Germany	FUP	muffle furnace	-	650	00:30:00	-	-	40.2	-	-	-	-	-	-	-	-	-	-	-	-	-	-	-	-	-	-	-	-	-	-	-	-	-	-	-	-	-	-	-
267	/Mai20, Mai21/	kaolinitic clay	Germany	RKUP	muffle furnace	-	680	00:30:00	-	-	10	-	-	-	-	-	-	-	-	-	-	-	-	-	-	-	-	-	-	-	-	-	-	-	-	-	-	-	-	-	-	-
268	/Mai20, Mai21/	smectitic-kaolinitic clay	Germany	AC	muffle furnace	-	680	00:30:00	-	-	30.2	-	-	-	-	-	-	-	-	-	-	-	-	-	-	-	-	-	-	-	-	-	-	-	-	-	-	-	-	-	-	-
269	/Mai20, Mai21/	smectitic clay	Germany	SW	muffle furnace	-	810	00:30:00	-	-	17.3	-	-	-	-	-	-	-	-	-	-	-	-	-	-	-	-	-	-	-	-	-	-	-	-	-	-	-	-	-	-	-
270	/Mai20, Mai21/	kaolinitc clay	Germany	SCW	muffle furnace	-	620	00:30:00	-	-	8.4	-	-	-	-	-	-	-	-	-	-	-	-	-	-	-	-	-	-	-	-	-	-	-	-	-	-	-	-	-	-	-
271	/Mai20, Mai21/	kaolinitc clay	Germany	CCW	muffle furnace	-	660	00:30:00	-	-	8.7	-	-	-	-	-	-	-	-	-	-	-	-	-	-	-	-	-	-	-	-	-	-	-	-	-	-	-	-	-	-	-
272	/Mai20, Mai21/	smectitic clay	Germany	MOSM	muffle furnace	-	700	00:30:00	-	-	16.5	-	-	-	-	-	-	-	-	-	-	-	-	-	-	-	-	-	-	-	-	-	-	-	-	-	-	-	-	-	-	-
273	/Mai20, Mai21/	kaolinitc-smectitic clay	Germany	SLS	muffle furnace	-	740	00:30:00	-	-	32.2	-	-	-	-	-	-	-	-	-	-	-	-	-	-	-	-	-	-	-	-	-	-	-	-	-	-	-	-	-	-	-
274	/Mai20, Mai21/	kaolinitc clay	Germany	KS	muffle furnace	-	650	00:30:00	-	-	n.d.	-	-	-	-	-	-	-	-	-	-	-	-	-	-	-	-	-	-	-	-	-	-	-	-	-	-	-	-	-	-	-
275	/Mai21/	kaolinitc-smectitic clay	Germany	OC	muffle furnace	-	680	00:30:00	-	-	-	-	-	-	-	-	-	-	-	-	-	-	-	-	-	-	-	-	-	-	-	-	-	-	-	-	-	-	-	-	-	-
276	/Lon22/	-	-	CY1	-	-	-	-	-	-	-	-	-	-	-	-	-	-	-	-	-	-	-	-	-	-	-	-	-	-	-	-	-	-	-	-	-	-	-	-	-	-
277	/Lon22/	-	-	CY2	-	-	-	-	-	-	-	-	-	-	-	-	-	-	-	-	-	-	-	-	-	-	-	-	-	-	-	-	-	-	-	-	-	-	-	-	-	-
278	/Lon22/	-	-	CY3	-	-	-	-	-	-	-	-	-	-	-	-	-	-	-	-	-	-	-	-	-	-	-	-	-	-	-	-	-	-	-	-	-	-	-	-	-	-
279	/Lon22/	-	-	CY4	-	-	-	-	-	-	-	-	-	-	-	-	-	-	-	-	-	-	-	-	-	-	-	-	-	-	-	-	-	-	-	-	-	-	-	-	-	-
280	/Lon22/	-	-	CY5	-	-	-	-	-	-	-	-	-	-	-	-	-	-	-	-	-	-	-	-	-	-	-	-	-	-	-	-	-	-	-	-	-	-	-	-	-	-
281	/Lon22/	-	-	CY6	-	-	-	-	-	-	-	-	-	-	-	-	-	-	-	-	-	-	-	-	-	-	-	-	-	-	-	-	-	-	-	-	-	-	-	-	-	-
282	/Lon22/	-	-	CY7	-	-	-	-	-	-	-	-	-	-	-	-	-	-	-	-	-	-	-	-	-	-	-	-	-	-	-	-	-	-	-	-	-	-	-	-	-	-
283	/Lon22/	-	-	CY8	-	-	-	-	-	-	-	-	-	-	-	-	-	-	-	-	-	-	-	-	-	-	-	-	-	-	-	-	-	-	-	-	-	-	-	-	-	-
284	/Lon22/	-	-	CY9	-	-	-	-	-	-	-	-	-	-	-	-	-	-	-	-	-	-	-	-	-	-	-	-	-	-	-	-	-	-	-	-	-	-	-	-	-	-
285	/Lon22/	-	-	CY10	-	-	-	-	-	-	-	-	-	-	-	-	-	-	-	-	-	-	-	-	-	-	-	-	-	-	-	-	-	-	-	-	-	-	-	-	-	-
286	/ibac/	-	Germany	B8363	-	-	-	-	-	-	-	-	-	-	-	-	-	2720	7100	-	-	-	-	-	-	-	-	-	-	-	-	-	-	-	-	-	-	-	-	-	-	-
287	/ibac/	-	Germany	B8400	-	-	-	-	-	-	-	-	-	-	-	-	-	2670	6600	-	-	-	-	-	-	-	-	-	-	-	-	-	-	-	-	-	-	-	-	-	-	-
288	/ibac/	-	Germany	B8457	-	-	-	-	-	-	-	-	-	-	-	-	-	2710	6600	-	-	-	-	-	-	-	-	3150	3363	-	-	-	-	-	-	-	-	-	-	-	-	-
289	/ibac/	-	Germany	A-rot	-	-	-	-	-	-	-	-	-	-	-	-	-	-	11200	-	-	-	-	-	-	-	-	-	-	-	-	-	-	-	-	-	-	-	-	-	-	-
290	/ibac/	-	Germany	A (0-2)	-	-	-	-	-	-	-	-	-	-	-	-	-	-	6150	-	-	-	-	-	-	-	-	-	-	-	-	-	-	-	-	-	-	-	-	-	-	-
291	/ibac/	-	Germany	B-LG	-	-	-	-	-	-	-	-	-	-	-	-	-	-	5264	-	-	-	-	-	-	-	-	-	-	-	-	-	-	-	-	-	-	-	-	-	-	-
292	/ibac/	-	-	B1	-	-	-	-	-	-	-	-	-	-	-	-	-	-	-	-	-	-	-	-	-	-	-	-	-	-	-	-	-	-	-	-	-	-	-	-	-	-
293	/ibac/	-	-	B2	-	-	-	-	-	-	-	-	-	-	-	-	-	-	-	-	-	-	-	-	-	-	-	-	-	-	-	-	-	-	-	-	-	-	-	-	-	-
294	/ibac/	-	-	C1	-	-	-	-	-	-	-	-	-	-	-	-	-	-	-	-	-	-	-	-	-	-	-	-	-	-	-	-	-	-	-	-	-	-	-	-	-	-
295	/ibac/	-	-	C2	-	-	-	-	-	-	-	-	-	-	-	-	-	-	-	-	-	-	-	-	-	-	-	-	-	-	-	-	-	-	-	-	-	-	-	-	-	-
296	/ibac/	-	-	C3	-	-	-	-	-	-	-	-	-	-	-	-	-	-	-	-	-	-	-	-	-	-	-	-	-	-	-	-	-	-	-	-	-	-	-	-	-	-
297	/ibac/	-	-	D1	-	-	-	-	-	-	-	-	-	-	-	-	-	-	-	-	-	-	-	-	-	-	-	-	-	-	-	-	-	-	-	-	-	-	-	-	-	-
298	/ibac/	-	-	D2	-	-	-	-	-	-	-	-	-	-	-	-	-	-	-	-	-	-	-	-	-	-	-	-	-	-	-	-	-	-	-	-	-	-	-	-	-	-
299	/ibac/	kaolinitc clay	-	Mk1	-	-	-	-	-	-	-	-	-	-	-	-	-	-	-	12.8	-	3.6	-	-	-	-	-	-	-	-	-	-	-	-	-	-	-	-	-	-	-	-
300	/ibac/	kaolinitc clay	-	Mk2	-	-	-	-	-	-	-	-	-	-	-	-	-	-	-	7	-	4.9	-	-	-	-	-	-	-	-	-	-	-	-	-	-	-	-	-	-	-	-
301	/ibac/	kaolinitc clay	-	Mk3	-	-	-	-	-	-	-	-	-	-	-	-	-	-	-	10.8	-	16.1	-	-	-	-	-	-	-	-	-	-	-	-	-	-	-	-	-	-	-	-
302	/ibac/	kaolinitc clay	-	Mk4	-	-	-	-	-	-	-	-	-	-	-	-	-	-	-	5.5	-	5.5	-	-	-	-	-	-	-	-	-	-	-	-	-	-	-	-	-	-	-	-
303	/ibac/	kaolinitc clay	-	Mk5	-	-	-	-	-	-	-	-	-	-	-	-	-	-	-	7.2	-	2.7	-	-	-	-	-	-	-	-	-	-	-	-	-	-	-	-	-	-	-	-
304
305
306
307
308
309
310
311
312
313
314
315
316
317
318
319
320
321
322
323
324
325
326
327
328
329
330
331
332
333
334
335
336
337
338
339
340
341
342
343
344
345
346
347
348
349
350
351
352
353
354
355
356
357
358
359
360
361
362
363
364
365
366
367
368
369
370
371
372
373
374
375
376
377
378
379
380
381
382
383
384
385
386
387
388
389
390
391
392
393
394
395
396
397
398
399
400
401
402
403
404
405
406
407
408
409
410
411
412
413
414
415
416
417
418
419
420
421
422
423
424
425
426
427
428
429
430
431
432
433
434
435
436
437
438
439
440
441
442
443
444
445
446
447
448
449
450
451
452
453
454
455
456
457
458
459
460
461
462
463
464
465
466
467
468
469
470
471
472
473
474
475
476
477
478
479
480
481
482
483
484
485
486
487
488
489
490
491
492
493
494
495
496
497
498
499
500
501
502
503
504
505
506
507
508
509
510
511
512
513
514
515
516
517
518
519
520
521
522
523
524
525
526
527
528
529
530
531
532
533
534
535
536
537
538
539
540
541
542
543
544
545
546
547
548
549
550
551
552
553
554
555
556
557
558
559
560
561
562
563
564
565
566
567
568
569
570
571
572
573
574
575
576
577
578
579
580
581
582
583
584
585
586
587
588
589
590
591
592
593
594
595
596
597
598
599
600
601
602
603
604
605
606
607
608
609
610
611
612
613
614
615
616
617
618
619
620
621
622
623
624
625
626
627
628
629
630
631
632
633
634
635
636
637
638
639
640
641
642
643
644
645
646
647
648
649
650
651
652
653
654
655
656
657
658
659
660
661
662
663
664
665
666
667
668
669
670
671
672
673
674
675
676
677
678
679
680
681
682
683
684
685
686
687
688
689
690
691
692
693
694
695
696
697
698
699
700
701
702
703
704
705
706
707
708
709
710
711
712
713
714
715
716
717
718
719
720
721
722
723
724
725
726
727
728
729
730
731
732
733
734
735
736
737
738
739
740
741
742
743
744
745
746
747
748
749
750
751
752
753
754
755
756
757
758
759
760
761
762
763
764
765
766
767
768
769
770
771
772
773
774
775
776
777
778
779
780
781
782
783
784
785
786
787
788
789
790
791
792
793
794
795
796
797
798
799
800
801
802
803
804
805
806
807
808
809
810
811
812
813
814
815
816
817
818
819
820
821
822
823
824
825
826
827
828
829
830
831
832
833
834
835
836
837
838
839
840
841
842
843
844
845
846
847
848
849
850
851
852
853
854
855
856
857
858
859
860
861
862
863
864
865
866
867
868
869
870
871
872
873
874
875
876
877
878
879
880
881
882
883
884
885
886
887
888
889
890
891
892
893
894
895
896
897
898
899
900
901
902
903
904
905
906
907
908
909
910
911
912
913
914
915
916
917
918
919
920
921
922
923
924
925
926
927
928
929
930
931
932
933
934
935
936
937
938
939
940
941
942
943
944
945
946
947
948
949
950
951
952
953
954
955
956
957
958
959
960
961
962
963
964
965
966
967
968
969
970
971
972
973
974
975
976
977
978
979
980
981
982
983
984
985
986
987
988
989
990
991
992
993
994
995
996
997
998
999
1000

## Sheet: ASTM C1897 – 20
sample No.	reference	Calcined Clay							cumulative heat	bound water	cumulative heat	bound water
		raw material category	origin country	sample name	calcination furnace	max. grainsize before calcination	calcination temperature	calcination duration	after 3 d		after 7d
-		-		-	-	mm	°C	h	J/g SCM	wt.-% of dried sample	J/g SCM	wt.-% of dried sample
1	/Beu12/	illitic-kaolinitic clay	Germany	Lias Delta Clay	rotary kiln	< 100	< 950	00:35:00	-	-	-	-
2	/Beu12/	illitic-kaolinitic clay	Germany	Lias Delta Clay	rotary kiln	< 100	< 950	00:35:00	-	-	-	-
3	/Beu12/	illitic-kaolinitic clay	Germany	Lias Delta Clay	rotary kiln	< 100	< 950	00:35:00	-	-	-	-
4	/Dan13/	kaolinitic clay	Portugal	AB1080	muffle kiln	-	700	00:45:00	-	-	-	-
5	/Dan13/	kaolinitic clay	Portugal	AB1080	muffle kiln	-	725	00:45:00	-	-	-	-
6	/Dan13/	kaolinitic clay	Portugal	AB1080	muffle kiln	-	750	00:45:00	-	-	-	-
7	/Dan13/	kaolinitic clay	Portugal	AB1080	muffle kiln	-	775	00:45:00	-	-	-	-
8	/Dan13/	kaolinitic clay	Portugal	AB1080	muffle kiln	-	800	00:45:00	-	-	-	-
9	/Dan13/	kaolinitic clay	Portugal	Aldeia e Irmao	muffle kiln	-	700	00:45:00	-	-	-	-
10	/Dan13/	kaolinitic clay	Portugal	Aldeia e Irmao	muffle kiln	-	725	00:45:00	-	-	-	-
11	/Dan13/	kaolinitic clay	Portugal	Aldeia e Irmao	muffle kiln	-	750	00:45:00	-	-	-	-
12	/Dan13/	kaolinitic clay	Portugal	Aldeia e Irmao	muffle kiln	-	775	00:45:00	-	-	-	-
13	/Dan13/	kaolinitic clay	Portugal	Aldeia e Irmao	muffle kiln	-	800	00:45:00	-	-	-	-
14	/Dan13/	kaolinitic clay	Portugal	Kal-Sorgila	muffle kiln	-	700	00:45:00	-	-	-	-
15	/Dan13/	kaolinitic clay	Portugal	Kal-Sorgila	muffle kiln	-	725	00:45:00	-	-	-	-
16	/Dan13/	kaolinitic clay	Portugal	Kal-Sorgila	muffle kiln	-	750	00:45:00	-	-	-	-
17	/Dan13/	kaolinitic clay	Portugal	Kal-Sorgila	muffle kiln	-	775	00:45:00	-	-	-	-
18	/Dan13/	kaolinitic clay	Portugal	Kal-Sorgila	muffle kiln	-	800	00:45:00	-	-	-	-
19	/Dan13/	kaolinitic clay	Portugal	Argila Sorgia	muffle kiln	-	700	00:45:00	-	-	-	-
20	/Dan13/	kaolinitic clay	Portugal	Argila Sorgia	muffle kiln	-	750	00:45:00	-	-	-	-
21	/Dan13/	kaolinitic clay	Portugal	Argila Sorgia	muffle kiln	-	800	00:45:00	-	-	-	-
22	/Dan13/	illitic clay	Portugal	Argila Rascoia	muffle kiln	-	700	00:45:00	-	-	-	-
23	/Dan13/	illitic clay	Portugal	Argila Rascoia	muffle kiln	-	750	00:45:00	-	-	-	-
24	/Dan13/	illitic clay	Portugal	Argila Rascoia	muffle kiln	-	800	00:45:00	-	-	-	-
25	/Dan13/	smectitic marl	Denmark	Sovind Marl	muffle kiln	-	700	00:45:00	-	-	-	-
26	/Dan13/	smectitic marl	Denmark	Sovind Marl	muffle kiln	-	750	00:45:00	-	-	-	-
27	/Dan13/	smectitic marl	Denmark	Sovind Marl	muffle kiln	-	800	00:45:00	-	-	-	-
28	/Dan13/	smectitic marl	Denmark	Sovind Marl	muffle kiln	-	850	00:45:00	-	-	-	-
29	/Dan13/	smectitic marl	Denmark	Sovind Marl	muffle kiln	-	900	00:45:00	-	-	-	-
30	/Dan13/	smectitic marl	Denmark	Sovind Marl	muffle kiln	-	950	00:45:00	-	-	-	-
31	/Dan13/	smectitic marl	Denmark	Sovind Marl	muffle kiln	-	1000	00:45:00	-	-	-	-
32	/Dan13/	smectitic marl	Denmark	Sovind Marl	industrial rotary kiln	-	750	-	-	-	-	-
33	/Dan13/	smectitic marl	Denmark	Sovind Marl	industrial rotary kiln	-	800	-	-	-	-	-
34	/Dan13/	smectitic marl	Denmark	Sovind Marl	industrial rotary kiln	-	850	-	-	-	-	-
35	/Dan13/	smectitic marl	Denmark	Sovind Marl	industrial rotary kiln	-	900	-	-	-	-	-
36	/Dan13/	smectitic marl	Denmark	Sovind Marl	industrial rotary kiln	-	950	-	-	-	-	-
37	/Dan13/	smectitic marl	Denmark	Sovind Marl H2	muffle kiln	-	600	00:45:00	-	-	-	-
38	/Dan13/	smectitic marl	Denmark	Sovind Marl H2	muffle kiln	-	650	00:45:00	-	-	-	-
39	/Dan13/	smectitic marl	Denmark	Sovind Marl H2	muffle kiln	-	700	00:45:00	-	-	-	-
40	/Dan13/	smectitic marl	Denmark	Sovind Marl H2	muffle kiln	-	750	00:45:00	-	-	-	-
41	/Dan13/	smectitic marl	Denmark	Sovind Marl H2	muffle kiln	-	800	00:45:00	-	-	-	-
42	/Dan13/	smectitic marl	Denmark	Sovind Marl H2	muffle kiln	-	850	00:45:00	-	-	-	-
43	/Dan13/	smectitic marl	Denmark	Sovind Marl H3	muffle kiln	-	600	00:45:00	-	-	-	-
44	/Dan13/	smectitic marl	Denmark	Sovind Marl H3	muffle kiln	-	650	00:45:00	-	-	-	-
45	/Dan13/	smectitic marl	Denmark	Sovind Marl H3	muffle kiln	-	700	00:45:00	-	-	-	-
46	/Dan13/	smectitic marl	Denmark	Sovind Marl H3	muffle kiln	-	750	00:45:00	-	-	-	-
47	/Dan13/	smectitic marl	Denmark	Sovind Marl H3	muffle kiln	-	800	00:45:00	-	-	-	-
48	/Dan13/	smectitic marl	Denmark	Sovind Marl H3	muffle kiln	-	850	00:45:00	-	-	-	-
49	/Dan13/	smectitic marl	Denmark	Sovind Marl H4	muffle kiln	-	600	00:45:00	-	-	-	-
50	/Dan13/	smectitic marl	Denmark	Sovind Marl H4	muffle kiln	-	650	00:45:00	-	-	-	-
51	/Dan13/	smectitic marl	Denmark	Sovind Marl H4	muffle kiln	-	700	00:45:00	-	-	-	-
52	/Dan13/	smectitic marl	Denmark	Sovind Marl H4	muffle kiln	-	750	00:45:00	-	-	-	-
53	/Dan13/	smectitic marl	Denmark	Sovind Marl H4	muffle kiln	-	800	00:45:00	-	-	-	-
54	/Dan13/	smectitic marl	Denmark	Sovind Marl H4	muffle kiln	-	850	00:45:00	-	-	-	-
55	/Dan13/	illitic clay	Poland	Gniew	muffle kiln	-	700	00:45:00	-	-	-	-
56	/Dan13/	illitic clay	Poland	Gniew	muffle kiln	-	725	00:45:00	-	-	-	-
57	/Dan13/	illitic clay	Poland	Gniew	muffle kiln	-	750	00:45:00	-	-	-	-
58	/Dan13/	illitic clay	Poland	Gniew	muffle kiln	-	775	00:45:00	-	-	-	-
59	/Dan13/	illitic clay	Poland	Gniew	muffle kiln	-	800	00:45:00	-	-	-	-
60	/Tol07/	calcined-clay brick	Brazil	GCWCCB	-	-	850	-	-	-	-	-
61	/Tol07/	calcined-clay brick	Brazil	GCWCCB	-	-	850	-	-	-	-	-
62	/Tol07/	calcined-clay brick	Brazil	GCWCCB	-	-	850	-	-	-	-	-
63	/Tol07/	calcined-clay brick	Brazil	GCWCCB	-	-	850	-	-	-	-	-
64	/Tol07/	calcined-clay brick	Brazil	GCWCCB	-	-	850	-	-	-	-	-
65	/Tol07/	calcined-clay brick	Brazil	GCWCCB	-	-	850	-	-	-	-	-
66	/Tol07/	calcined-clay brick	Brazil	GCWCCB	-	-	850	-	-	-	-	-
67	/Tol07/	calcined-clay brick	Brazil	GCWCCB	-	-	850	-	-	-	-	-
68	/Beu15/	kaolinitc clay	Germany	LCT	muffle furnace	-	720	00:60	-	-	-	-
69	/Beu15/	kaolinitc clay	Germany	GCT	rotary kiln	-	750	-	-	-	-	-
70	/Beu15/	kaolinitc clay	Germany	LCT	muffle furnace	-	600	00:60	-	-	-	-
71	/Beu15/	kaolinitc clay	Germany	GCT	rotary kiln	-	600	-	-	-	-	-
72	/Beu15/	kaolinitc clay	Germany	LCT	muffle furnace	-	770	00:60	-	-	-	-
73	/Beu15/	kaolinitc clay	Germany	GCT	rotary kiln	-	800	-	-	-	-	-
74	/Beu15/	kaolinitc clay	Germany	LCT	muffle furnace	-	820	00:60	-	-	-	-
75	/Beu15/	kaolinitc clay	Germany	GCT	rotary kiln	-	850	-	-	-	-	-
76	/Beu15/	kaolinitc clay	Germany	LCT	muffle furnace	-	1000	00:60	-	-	-	-
77	/Beu15/	kaolinitc clay	Germany	GCT	rotary kiln	-	1000	-	-	-	-	-
78	/Trü19/	kaolinitc clay	-	K_700_D	pilot rotary kiln	-	700	00:10:00	-	-	-	-
79	/Trü19/	kaolinitc clay	-	K_700_D	pilot rotary kiln	-	700	00:10:00	-	-	-	-
80	/Trü19/	Illitic clay	-	I_900_D	pilot rotary kiln	-	900	00:10:00	-	-	-	-
81	/Trü19/	Illitic clay	-	I_900_D	pilot rotary kiln	-	900	00:10:00	-	-	-	-
82	/Trü19/	smectitic clay	-	M_900_D	pilot rotary kiln	-	900	00:10:00	-	-	-	-
83	/Trü19/	smectitic clay	-	M_900_D	pilot rotary kiln	-	900	00:10:00	-	-	-	-
84	/He95/	Illitic clay	USA	Illite	muffle furnace	-	650	01:40:00	-	-	-	-
85	/He95/	Illitic clay	USA	Illite	muffle furnace	-	790	01:40:00	-	-	-	-
86	/He95/	Illitic clay	USA	Illite	muffle furnace	-	930	01:40:00	-	-	-	-
87	/He94/	kaolin	Denmark?	kaolin	muffle furnace	-	550	01:40:00	-	-	-	-
88	/He94/	kaolin	Denmark?	kaolin	muffle furnace	-	650	01:40:00	-	-	-	-
89	/He94/	kaolin	Denmark?	kaolin	muffle furnace	-	800	01:40:00	-	-	-	-
90	/He94/	kaolin	Denmark?	kaolin	muffle furnace	-	950	01:40:00	-	-	-	-
91	/Bal21/	kaolinitic-illitic clay	Russian Federation	Nikitsky	-	-	200	1900-01-08	-	-	-	-
92	/Bal21/	kaolinitic-illitic clay	Russian Federation	Nikitsky	-	-	400	02:00:00	-	-	-	-
93	/Bal21/	kaolinitic-illitic clay	Russian Federation	Nikitsky	-	-	600	02:00:00	-	-	-	-
94	/Bal21/	kaolinitic-illitic clay	Russian Federation	Nikitsky	-	-	700	02:00:00	-	-	-	-
95	/Bal21/	kaolinitic-illitic clay	Russian Federation	Nikitsky	-	-	800	02:00:00	-	-	-	-
96	/Bal21/	kaolinitic-illitic clay	Russian Federation	Nikitsky	-	-	900	02:00:00	-	-	-	-
97	/Bal21/	illitic-kaolinitic clay	Russian Federation	Staroshaigovsky	-	-	200	02:00:00	-	-	-	-
98	/Bal21/	illitic-kaolinitic clay	Russian Federation	Staroshaigovsky	-	-	400	02:00:00	-	-	-	-
99	/Bal21/	illitic-kaolinitic clay	Russian Federation	Staroshaigovsky	-	-	600	02:00:00	-	-	-	-
100	/Bal21/	illitic-kaolinitic clay	Russian Federation	Staroshaigovsky	-	-	700	02:00:00	-	-	-	-
101	/Bal21/	illitic-kaolinitic clay	Russian Federation	Staroshaigovsky	-	-	800	02:00:00	-	-	-	-
102	/Bal21/	illitic-kaolinitic clay	Russian Federation	Staroshaigovsky	-	-	900	02:00:00	-	-	-	-
103	/Dan19/	kaolinitic clay	-	Clay A	pilot scale rotary kiln	-	800	00:45:00	-	-	-	-
104	/Dan19/	kaolinitic clay	-	Clay A	pilot scale rotary kiln	-	800	00:45:00	-	-	-	-
105	/Dan19/	kaolinitic clay	-	Clay A	pilot scale rotary kiln	-	800	00:45:00	-	-	-	-
106	/Dan19/	smectitic marl	-	Clay B	pilot scale rotary kiln	-	800	00:45:00	-	-	-	-
107	/Dan19/	smectitic marl	-	Clay B	pilot scale rotary kiln	-	800	00:45:00	-	-	-	-
108	/Dan19/	smectitic marl	-	Clay B	pilot scale rotary kiln	-	800	00:45:00	-	-	-	-
109	/Dan18/	kaolinitic clay	-	Clay A	pilot scale rotary kiln	-	700	00:45:00	-	-	-	-
110	/Dan18/	kaolinitic clay	-	Clay A	pilot scale rotary kiln	-	725	00:45:00	-	-	-	-
111	/Dan18/	kaolinitic clay	-	Clay A	pilot scale rotary kiln	-	750	00:45:00	-	-	-	-
112	/Dan18/	kaolinitic clay	-	Clay A	pilot scale rotary kiln	-	775	00:45:00	-	-	-	-
113	/Dan18/	kaolinitic clay	-	Clay A	pilot scale rotary kiln	-	800	00:45:00	-	-	-	-
114	/Dan18/	smectitic marl	-	Clay B	pilot scale rotary kiln	-	700	00:45:00	-	-	-	-
115	/Dan18/	smectitic marl	-	Clay B	pilot scale rotary kiln	-	750	00:45:00	-	-	-	-
116	/Dan18/	smectitic marl	-	Clay B	pilot scale rotary kiln	-	800	00:45:00	-	-	-	-
117	/Dan18/	smectitic marl	-	Clay B	pilot scale rotary kiln	-	850	00:45:00	-	-	-	-
118	/Dan18/	smectitic marl	-	Clay B	pilot scale rotary kiln	-	900	00:45:00	-	-	-	-
119	/Dan18/	smectitic marl	-	Clay B	pilot scale rotary kiln	-	950	00:45:00	-	-	-	-
120	/Dan18/	smectitic marl	-	Clay B	pilot scale rotary kiln	-	1000	00:45:00	-	-	-	-
121	/Mer20/	illitic shale	-	MI1	-	-	950	-	-	-	-	-
122	/Mer20/	illitic shale	-	MI1	-	-	950	-	-	-	-	-
123	/Mer20/	illitic shale	-	MI1	-	-	950	-	-	-	-	-
124	/Mer20/	illitic shale	-	MI2	-	-	950	-	-	-	-	-
125	/Mer20/	illitic shale	-	MI2	-	-	950	-	-	-	-	-
126	/Mer20/	illitic shale	-	MI2	-	-	950	-	-	-	-	-
127	/Jaf20/	smectitic-kaolinitic clay	-	CC	-	-	750	03:00:00	-	-	-	-
128	/Msi20/	illitic clay	Germany	I1	laboratory-scale rotary	-	850	-	-	-	-	-
129	/Msi20/	illitic clay	Germany	I1	laboratory-scale rotary	-	900	-	-	-	-	-
130	/Msi20/	illitic clay	Germany	I2	laboratory-scale rotary	-	850	-	-	-	-	-
131	/Msi20/	illitic clay	Germany	I2	laboratory-scale rotary	-	900	-	-	-	-	-
132	/Msi20/	kaolinitic clay	Germany	K1	laboratory-scale rotary	-	650	-	-	-	-	-
133	/Msi20/	kaolinitic clay	Germany	K1	laboratory-scale rotary	-	900	-	-	-	-	-
134	/Msi20/	illitic-kaolinitic clay	Germany	B1	laboratory-scale rotary	-	650	-	-	-	-	-
135	/Msi20/	illitic-kaolinitic clay	Germany	B1	laboratory-scale rotary	-	900	-	-	-	-	-
136	/Dan20/	smectitic clay	Germany?	Sm	pilot scale rotary kiln	-	800	00:45:00	-	-	-	-
137	/Dan20/	smectitic clay	Germany?	Sm-Ca	pilot scale rotary kiln	-	800	00:45:00	-	-	-	-
138	/Dan20/	illitic clay	Germany?	Ill	pilot scale rotary kiln	-	800	00:45:00	-	-	-	-
139	/Dan20/	illitic clay	Germany?	Ill-Ca	pilot scale rotary kiln	-	800	00:45:00	-	-	-	-
140	/Ira19a/	illitic shale	Argentina	LUT	laboratory furnace	-	900	-	-	-	-	-
141	/Ira19a/	illitic shale	Argentina	LUT	laboratory furnace	-	1000	-	-	-	-	-
142	/Ira19a/	illitic shale	Argentina	LUT	laboratory furnace	-	1100	-	-	-	-	-
143	/Ira19a/	illitic shale	Argentina	HET	laboratory furnace	-	900	-	-	-	-	-
144	/Ira19a/	illitic shale	Argentina	HET	laboratory furnace	-	1000	-	-	-	-	-
145	/Ira19a/	illitic shale	Argentina	HET	laboratory furnace	-	1100	-	-	-	-	-
146	/Ira19b/	illitic shale	Argentina	IC01	laboratory furnace	-	950	-	-	-	-	-
147	/Ira19b/	illitic shale	Argentina	IC02	laboratory furnace	-	950	-	-	-	-	-
148	/Ira19b/	illitic shale	Argentina	IC03	laboratory furnace	-	950	-	-	-	-	-
149	/Ira19b/	illitic shale	Argentina	IC04	laboratory furnace	-	950	-	-	-	-	-
150	/Ira19b/	illitic shale	Argentina	IC05	laboratory furnace	-	950	-	-	-	-	-
151	/Ira19b/	illitic shale	Argentina	IC06	laboratory furnace	-	950	-	-	-	-	-
152	/Ira19b/	kaolinitic shale	Argentina	KC01	laboratory furnace	-	600	-	-	-	-	-
153	/Ira19b/	kaolinitic shale	Argentina	KC02	laboratory furnace	-	600	-	-	-	-	-
154	/Moh16/	illitic marl	Algeria	CM 500°C-5h	laboratory furnace	-	500	05:00	-	-	-	-
155	/Moh16/	illitic marl	Algeria	CM 600°C-2h	laboratory furnace	-	600	02:00	-	-	-	-
156	/Moh16/	illitic marl	Algeria	CM 600°C-3h	laboratory furnace	-	600	03:00	-	-	-	-
157	/Moh16/	illitic marl	Algeria	CM 600°C-5h	laboratory furnace	-	600	05:00	-	-	-	-
158	/Moh16/	illitic marl	Algeria	CM 700°C-2h	laboratory furnace	-	700	02:00	-	-	-	-
159	/Moh16/	illitic marl	Algeria	CM 700°C-3h	laboratory furnace	-	700	03:00	-	-	-	-
160	/Moh16/	illitic marl	Algeria	CM 700°C-5h	laboratory furnace	-	700	05:00	-	-	-	-
161	/Moh16/	illitic marl	Algeria	CM 800°C-2h	laboratory furnace	-	800	02:00	-	-	-	-
162	/Moh16/	illitic marl	Algeria	CM 800°C-3h	laboratory furnace	-	800	03:00	-	-	-	-
163	/Moh16/	illitic marl	Algeria	CM 800°C-5h	laboratory furnace	-	800	05:00	-	-	-	-
164	/Moh16/	illitic marl	Algeria	CM 1000°C-2h	laboratory furnace	-	1000	02:00	-	-	-	-
165	/Tay15/	kaolin	USA	K	laboratory furnace	-	650	01:00	-	-	-	-
166	/Tay15/	kaolinite-calcium bentonite	USA	KCaB	laboratory furnace	-	930	01:00	-	-	-	-
167	/Tay15/	kaolinite-sodium bentonite	USA	KNaB	laboratory furnace	-	830	01:00	-	-	-	-
168	/Tir14/	kaolinitic clay	Argentina	MK1	laboratory furnace	< 4 mm	700	-	-	-	-	-
169	/Tir14/	kaolinitic clay	Argentina	MK2	laboratory furnace	< 4 mm	700	-	-	-	-	-
170	/Tir14/	kaolinitic clay	Argentina	MK3	laboratory furnace	< 4 mm	700	-	-	-	-	-
171	/Tir14/	kaolinitic clay	Argentina	MK4	laboratory furnace	< 4 mm	700	-	-	-	-	-
172	/Tir14/	kaolinitic-illitic clay	Argentina	MK5	laboratory furnace	< 4 mm	700	-	-	-	-	-
173	/Aka15/	kaolinitic clay	Lybia	Sebha (A)	-	6.35-12.7 mm	800	02:00	-	-	-	-
174	/Aka15/	kaolinitic clay	Lybia	Sebha (A)	-	6.35-12.7 mm	800	02:00	-	-	-	-
175	/Aka15/	kaolinitic clay	Lybia	Sebha (A)	-	6.35-12.7 mm	800	02:00	-	-	-	-
176	/Aka15/	kaolinitic clay	Lybia	Temenhint (B)	-	6.35-12.7 mm	800	02:00	-	-	-	-
177	/Aka15/	kaolinitic clay	Lybia	Temenhint (B)	-	6.35-12.7 mm	800	02:00	-	-	-	-
178	/Aka15/	kaolinitic clay	Lybia	Temenhint (B)	-	6.35-12.7 mm	800	02:00	-	-	-	-
179	/Aka15/	kaolinitic clay	Lybia	Alafya (′C)	-	6.35-12.7 mm	800	02:00	-	-	-	-
180	/Aka15/	kaolinitic clay	Lybia	Alafya (′C)	-	6.35-12.7 mm	800	02:00	-	-	-	-
181	/Aka15/	kaolinitic clay	Lybia	Alafya (′C)	-	6.35-12.7 mm	800	02:00	-	-	-	-
182	/Aka15/	kaolinitic clay	Lybia	Agar (D)	-	6.35-12.7 mm	800	02:00	-	-	-	-
183	/Aka15/	kaolinitic clay	Lybia	Agar (D)	-	6.35-12.7 mm	800	02:00	-	-	-	-
184	/Aka15/	kaolinitic clay	Lybia	Agar (D)	-	6.35-12.7 mm	800	02:00	-	-	-	-
185	/Aka15/	kaolinitic clay	Lybia	Tarout (E)	-	6.35-12.7 mm	800	02:00	-	-	-	-
186	/Aka15/	kaolinitic clay	Lybia	Tarout (E)	-	6.35-12.7 mm	800	02:00	-	-	-	-
187	/Aka15/	kaolinitic clay	Lybia	Tarout (E)	-	6.35-12.7 mm	800	02:00	-	-	-	-
188	/Tre18/	kaolinitic clay	Argentina	PK1	-	-	600	-	-	-	-	-
189	/Tre18/	kaolinitic clay	Argentina	PK2	-	-	600	-	-	-	-	-
190	/Hue18/	illitic-kaolinitic	-	PL1	pilot scale rotary kiln	-	600	-	-	-	-	-
191	/Hue18/	illitic-kaolinitic	-	PL1	pilot scale rotary kiln	-	650	-	-	-	-	-
192	/Hue18/	illitic-kaolinitic	-	PL1	pilot scale rotary kiln	-	700	-	-	-	-	-
193	/Hue18/	kaolinitic-illitic clay	-	PL2	pilot scale rotary kiln	-	600	-	-	-	-	-
194	/Hue18/	kaolinitic-illitic clay	-	PL2	pilot scale rotary kiln	-	650	-	-	-	-	-
195	/Hue18/	kaolinitic-illitic clay	-	PL2	pilot scale rotary kiln	-	700	-	-	-	-	-
196	/Hue18/	kaolinitic clay	-	PL7	pilot scale rotary kiln	-	600	-	-	-	-	-
197	/Hue18/	kaolinitic clay	-	PL7	pilot scale rotary kiln	-	650	-	-	-	-	-
198	/Hue18/	kaolinitic clay	-	PL7	pilot scale rotary kiln	-	700	-	-	-	-	-
199	/Hue18/	kaolinitic-illitic clay	-	PL1_80_PL7_20	pilot scale rotary kiln	-	600	-	-	-	-	-
200	/Hue18/	kaolinitic-illitic clay	-	PL1_80_PL7_20	pilot scale rotary kiln	-	650	-	-	-	-	-
201	/Hue18/	kaolinitic-illitic clay	-	PL1_80_PL7_20	pilot scale rotary kiln	-	700	-	-	-	-	-
202	/Hue18/	kaolinitic-illitic clay	-	PL1_60_PL7_40	pilot scale rotary kiln	-	600	-	-	-	-	-
203	/Hue18/	kaolinitic-illitic clay	-	PL1_60_PL7_40	pilot scale rotary kiln	-	650	-	-	-	-	-
204	/Hue18/	kaolinitic-illitic clay	-	PL1_60_PL7_40	pilot scale rotary kiln	-	700	-	-	-	-	-
205	/Hue18/	kaolinitic-illitic clay	-	PL1_40_PL7_60	pilot scale rotary kiln	-	600	-	-	-	-	-
206	/Hue18/	kaolinitic-illitic clay	-	PL1_40_PL7_60	pilot scale rotary kiln	-	650	-	-	-	-	-
207	/Hue18/	kaolinitic-illitic clay	-	PL1_40_PL7_60	pilot scale rotary kiln	-	700	-	-	-	-	-
208	/Hue18/	kaolinitic-illitic clay	-	PL1_20_PL7_80	pilot scale rotary kiln	-	600	-	-	-	-	-
209	/Hue18/	kaolinitic-illitic clay	-	PL1_20_PL7_80	pilot scale rotary kiln	-	650	-	-	-	-	-
210	/Hue18/	kaolinitic-illitic clay	-	PL1_20_PL7_80	pilot scale rotary kiln	-	700	-	-	-	-	-
211	/Hue18/	kaolinitic-illitic clay	-	PL2_80_PL7_20	pilot scale rotary kiln	-	600	-	-	-	-	-
212	/Hue18/	kaolinitic-illitic clay	-	PL2_80_PL7_20	pilot scale rotary kiln	-	650	-	-	-	-	-
213	/Hue18/	kaolinitic-illitic clay	-	PL2_80_PL7_20	pilot scale rotary kiln	-	700	-	-	-	-	-
214	/Hue18/	kaolinitic-illitic clay	-	PL2_60_PL7_40	pilot scale rotary kiln	-	600	-	-	-	-	-
215	/Hue18/	kaolinitic-illitic clay	-	PL2_60_PL7_40	pilot scale rotary kiln	-	650	-	-	-	-	-
216	/Hue18/	kaolinitic-illitic clay	-	PL2_60_PL7_40	pilot scale rotary kiln	-	700	-	-	-	-	-
217	/Hue18/	kaolinitic-illitic clay	-	PL2_40_PL7_60	pilot scale rotary kiln	-	600	-	-	-	-	-
218	/Hue18/	kaolinitic-illitic clay	-	PL2_40_PL7_60	pilot scale rotary kiln	-	650	-	-	-	-	-
219	/Hue18/	kaolinitic-illitic clay	-	PL2_40_PL7_60	pilot scale rotary kiln	-	700	-	-	-	-	-
220	/Hue18/	kaolinitic-illitic clay	-	PL2_20_PL7_80	pilot scale rotary kiln	-	600	-	-	-	-	-
221	/Hue18/	kaolinitic-illitic clay	-	PL2_20_PL7_80	pilot scale rotary kiln	-	650	-	-	-	-	-
222	/Hue18/	kaolinitic-illitic clay	-	PL2_20_PL7_80	pilot scale rotary kiln	-	700	-	-	-	-	-
223	/Lem18/	illitic clay	Argentina	L	-	-	900	-	-	-	-	-
224	/Lem18/	illitic clay	Argentina	L	-	-	1000	-	-	-	-	-
225	/Lem18/	illitic clay	Argentina	L	-	-	1100	-	-	-	-	-
226	/Fri10/	kaolinitic paper sludge	-	CPS	-	-	650	02:00	-	-	-	-
227	/Gon09/	calcined-clay brick	-	GB	-	-	850	-	-	-	-	-
228	/Gon09/	calcined-clay brick	-	GB	-	-	850	-	-	-	-	-
229	/Gon09/	calcined-clay brick	-	GB	-	-	850	-	-	-	-	-
230	/Gon09/	calcined-clay brick	-	GB	-	-	850	-	-	-	-	-
231	/Gon09/	metakaolin	-	Mk1	-	-	-	-	-	-	-	-
232	/Gon09/	metakaolin	-	Mk1	-	-	-	-	-	-	-	-
233	/Gon09/	metakaolin	-	Mk1	-	-	-	-	-	-	-	-
234	/Gon09/	metakaolin	-	Mk1	-	-	-	-	-	-	-	-
235	/Gon09/	metakaolin	-	Mk2	-	-	550	02:00	-	-	-	-
236	/Gon09/	metakaolin	-	Mk2	-	-	550	02:00	-	-	-	-
237	/Gon09/	metakaolin	-	Mk2	-	-	550	02:00	-	-	-	-
238	/Gon09/	metakaolin	-	Mk2	-	-	550	02:00	-	-	-	-
239	/Gut08/	metakaolin	Colombia	MKN	-	-	600	-	-	-	-	-
240	/Gut08/	metakaolin	Colombia	MKN	-	-	800	-	-	-	-	-
241	/Fri08/	kaolinitic paper sludge	-	CCW	-	-	700-800 °C	02:00	-	-	-	-
242	/O'Fa06/	illitic-kaolinitic clay	-	HTC QC	-	-	800 °C	02:00	-	-	-	-
243	/O'Fa06/	illitic-kaolinitic clay	-	HTC QC	-	-	800 °C	02:00	-	-	-	-
244	/O'Fa06/	illitic-kaolinitic clay	-	HTC QC	-	-	800 °C	02:00	-	-	-	-
245	/O'Fa06/	illitic-kaolinitic clay	-	HTC SC	-	-	800 °C	02:00	-	-	-	-
246	/O'Fa06/	illitic-kaolinitic clay	-	HTC SC	-	-	800 °C	02:00	-	-	-	-
247	/O'Fa06/	illitic-kaolinitic clay	-	HTC SC	-	-	800 °C	02:00	-	-	-	-
248	/He96/	Na-montmorillonite	-	NaM	muffle furnace	-	740	01:40	-	-	-	-
249	/He96/	Na-montmorillonite	-	NaM	muffle furnace	-	830	01:40	-	-	-	-
250	/He96/	Na-montmorillonite	-	NaM	muffle furnace	-	920	01:40	-	-	-	-
251	/He96/	Ca-montmorillonite	-	CaM	muffle furnace	-	730	01:40	-	-	-	-
252	/He96/	Ca-montmorillonite	-	CaM	muffle furnace	-	830	01:40	-	-	-	-
253	/He96/	Ca-montmorillonite	-	CaM	muffle furnace	-	930	01:40	-	-	-	-
254	/Bra18/	mixed clay	bulgaria	S	laboratory furnace	< 0.5	800	00:20	-	-	-	-
255	/Bra18/	smectitic-kaolinitic clay	bulgaria	Ch	laboratory furnace	< 0.5	800	00:20	-	-	-	-
256	/Bra18/	smectitic-kaolinitic clay	bulgaria	SK	laboratory furnace	< 0.5	800	00:20	-	-	-	-
257	/Bra18/	smectitic clay	bulgaria	B	laboratory furnace	< 0.5	780	00:20	-	-	-	-
258	/Bra18/	kaolin	bulgaria	K	laboratory furnace	< 0.5	800	00:20	-	-	-	-
259	/Bra18/	mixed clay	bulgaria	M	laboratory furnace	< 0.5	800	00:20	-	-	-	-
260	/Bra18/	mixed clay	bulgaria	D	laboratory furnace	< 0.5	780	00:20	-	-	-	-
261	/Bra18/	illitic-smectitic clay	bulgaria	BB	laboratory furnace	< 0.5	800	00:20	-	-	-	-
262	/Mou01/	kaolinitic clay	-	Sample 1	static laboratory furnace	-	750	02:00	-	-	-	-
263	/Mou01/	kaolinitic clay	-	Sample 2	static laboratory furnace	-	750	02:00	-	-	-	-
264	/Mai20, Mai21/	kaolinitic clay	Germany	KT	muffle furnace	-	800	00:30:00	174	-	-	-
265	/Mai20, Mai21/	chloride and mica-rich	Germany	KUP	muffle furnace	-	620	00:30:00	246	-	-	-
266	/Mai20, Mai21/	smectitic mixed clay	Germany	FUP	muffle furnace	-	650	00:30:00	610.03	-	-	-
267	/Mai20, Mai21/	kaolinitic clay	Germany	RKUP	muffle furnace	-	680	00:30:00	462.83	-	-	-
268	/Mai20, Mai21/	smectitic-kaolinitic clay	Germany	AC	muffle furnace	-	680	00:30:00	279	-	-	-
269	/Mai20, Mai21/	smectitic clay	Germany	SW	muffle furnace	-	810	00:30:00	67	-	-	-
270	/Mai20, Mai21/	kaolinitc clay	Germany	SCW	muffle furnace	-	620	00:30:00	368	-	-	-
271	/Mai20, Mai21/	kaolinitc clay	Germany	CCW	muffle furnace	-	660	00:30:00	186	-	-	-
272	/Mai20, Mai21/	smectitic clay	Germany	MOSM	muffle furnace	-	700	00:30:00	141	-	-	-
273	/Mai20, Mai21/	kaolinitc-smectitic clay	Germany	SLS	muffle furnace	-	740	00:30:00	113	-	-	-
274	/Mai20, Mai21/	kaolinitc clay	Germany	KS	muffle furnace	-	650	00:30:00	702.12	-	-	-
275	/Mai21/	kaolinitc-smectitic clay	Germany	OC	muffle furnace	-	680	00:30:00	233	-	-	-
276	/Lon22/	-	-	CY1	-	-	-	-	671.51	-	690.892	11.1873
277	/Lon22/	-	-	CY2	-	-	-	-	450.278	-	468.853	8.3977
278	/Lon22/	-	-	CY3	-	-	-	-	519.243	-	549.761	9.7225
279	/Lon22/	-	-	CY4	-	-	-	-	203.91	-	251.777	6.66
280	/Lon22/	-	-	CY5	-	-	-	-	317.244	-	342.326	7.8975
281	/Lon22/	-	-	CY6	-	-	-	-	306.984	-	415.126	8.7678
282	/Lon22/	-	-	CY7	-	-	-	-	508.24	-	552.802	10.4417
283	/Lon22/	-	-	CY8	-	-	-	-	948.625	-	964.71	14.6269
284	/Lon22/	-	-	CY9	-	-	-	-	716.203	-	737.205	12.7382
285	/Lon22/	-	-	CY10	-	-	-	-	871.548	-	900.979	14.4866
286	/ibac/	-	Germany	B8363	-	-	-	-	52.6	-	69	-
287	/ibac/	-	Germany	B8400	-	-	-	-	98.9	-	146	-
288	/ibac/	-	Germany	B8457	-	-	-	-	71.3	-	106.6	-
289	/ibac/	-	Germany	A-rot	-	-	-	-	124.2	-	230.5	4.31
290	/ibac/	-	Germany	A (0-2)	-	-	-	-	95.5	-	204.6	3.84
291	/ibac/	-	Germany	B-LG	-	-	-	-	125.4	-	200.4	4.44
292	/ibac/	-	-	B1	-	-	-	-	670	-	722	-
293	/ibac/	-	-	B2	-	-	-	-	715	-	746	-
294	/ibac/	-	-	C1	-	-	-	-	563	-	586	-
295	/ibac/	-	-	C2	-	-	-	-	436	-	493	-
296	/ibac/	-	-	C3	-	-	-	-	507	-	532	-
297	/ibac/	-	-	D1	-	-	-	-	264	-	278	-
298	/ibac/	-	-	D2	-	-	-	-	259	-	-	-
299	/ibac/	kaolinitc clay	-	Mk1	-	-	-	-	1015	-	1039	-
300	/ibac/	kaolinitc clay	-	Mk2	-	-	-	-	803	-	817	-
301	/ibac/	kaolinitc clay	-	Mk3	-	-	-	-	772	-	815	-
302	/ibac/	kaolinitc clay	-	Mk4	-	-	-	-	643	-	664	-
303	/ibac/	kaolinitc clay	-	Mk5	-	-	-	-	225	-	294	-
304
305
306
307
308
309
310
311
312
313
314
315
316
317
318
319
320
321
322
323
324
325
326
327
328
329
330
331
332
333
334
335
336
337
338
339
340
341
342
343
344
345
346
347
348
349
350
351
352
353
354
355
356
357
358
359
360
361
362
363
364
365
366
367
368
369
370
371
372
373
374
375
376
377
378
379
380
381
382
383
384
385
386
387
388
389
390
391
392
393
394
395
396
397
398
399
400
401
402
403
404
405
406
407
408
409
410
411
412
413
414
415
416
417
418
419
420
421
422
423
424
425
426
427
428
429
430
431
432
433
434
435
436
437
438
439
440
441
442
443
444
445
446
447
448
449
450
451
452
453
454
455
456
457
458
459
460
461
462
463
464
465
466
467
468
469
470
471
472
473
474
475
476
477
478
479
480
481
482
483
484
485
486
487
488
489
490
491
492
493
494
495
496
497
498
499
500
501
502
503
504
505
506
507
508
509
510
511
512
513
514
515
516
517
518
519
520
521
522
523
524
525
526
527
528
529
530
531
532
533
534
535
536
537
538
539
540
541
542
543
544
545
546
547
548
549
550
551
552
553
554
555
556
557
558
559
560
561
562
563
564
565
566
567
568
569
570
571
572
573
574
575
576
577
578
579
580
581
582
583
584
585
586
587
588
589
590
591
592
593
594
595
596
597
598
599
600
601
602
603
604
605
606
607
608
609
610
611
612
613
614
615
616
617
618
619
620
621
622
623
624
625
626
627
628
629
630
631
632
633
634
635
636
637
638
639
640
641
642
643
644
645
646
647
648
649
650
651
652
653
654
655
656
657
658
659
660
661
662
663
664
665
666
667
668
669
670
671
672
673
674
675
676
677
678
679
680
681
682
683
684
685
686
687
688
689
690
691
692
693
694
695
696
697
698
699
700
701
702
703
704
705
706
707
708
709
710
711
712
713
714
715
716
717
718
719
720
721
722
723
724
725
726
727
728
729
730
731
732
733
734
735
736
737
738
739
740
741
742
743
744
745
746
747
748
749
750
751
752
753
754
755
756
757
758
759
760
761
762
763
764
765
766
767
768
769
770
771
772
773
774
775
776
777
778
779
780
781
782
783
784
785
786
787
788
789
790
791
792
793
794
795
796
797
798
799
800
801
802
803
804
805
806
807
808
809
810
811
812
813
814
815
816
817
818
819
820
821
822
823
824
825
826
827
828
829
830
831
832
833
834
835
836
837
838
839
840
841
842
843
844
845
846
847
848
849
850
851
852
853
854
855
856
857
858
859
860
861
862
863
864
865
866
867
868
869
870
871
872
873
874
875
876
877
878
879
880
881
882
883
884
885
886
887
888
889
890
891
892
893
894
895
896
897
898
899
900
901
902
903
904
905
906
907
908
909
910
911
912
913
914
915
916
917
918
919
920
921
922
923
924
925
926
927
928
929
930
931
932
933
934
935
936
937
938
939
940
941
942
943
944
945
946
947
948
949
950
951
952
953
954
955
956
957
958
959
960
961
962
963
964
965
966
967
968
969
970
971
972
973
974
975
976
977
978
979
980
981
982
983
984
985
986
987
988
989
990
991
992
993
994
995
996
997
998
999
1000

## Sheet: references
Reference	Literature
/Aka15/	A.M. Akasha, Using of Libyan Calcined Clay in Concrete,Calcined Clays for Sustainable Concrete, RILEM Bookseries 10 (2015) 555-561. DOI: 10.1007/978-94-017-9939-3_69
/Bal21/	A.S. Balykov, T.A. Nizina, V.V. Volodin, V.M. Kyashkin, Effects of Calcination Temperature and Time on the Physical-Chemical Efficiency of Thermally Activated Clays in Cement Systems. Materials Science Forum 1017 (2021) 61–70. DOI: 10.4028/www.scientific.net/msf.1017.61
/Beu12/	N. Beuntner, K. Rapp, K-C Thienel, Efficiency of calcined clay in cementitious systems, 12th International Conference on Recent Advances in Concrete Technology and Sustainability Issues, Prag (October 2012). DOI: 10.14359/51684280
/Beu15/	N. Beuntner, K.-C. Thienel, Properties of Calcined Lias Delta Clay - Technological Effects, Physical Characteristics and Reactivity in Cement, Calcined Clays for Sustainable Concrete, RILEM Bookseries 10 (2015) 43–50. DOI:10.1007/978-94-017-9939-3_6
/Bra18/	B. Bratoev, I. Doykov, J. Ninov, A. Lenchev, Pozzolanic activity assessment of calcined clays with complex minerals content, Advances in Cement Research 30 (2018) 103–112. DOI: 10.1680/jadcr.17.00057
/Dan13/	T. Danner, Reactivity of Calcined Clays, dissertation, Trondheim, 2013.
/Dan18/	T. Danner, G. Norden, H. Justnes, Characterisation of calcined raw clays suitable as supplementary cementitious materials, Applied Clay Science 162 (2018) 391–402. DOI: https://doi.org/10.1016/j.clay.2018.06.030
/Dan19/	T. Danner, G. Norden, H. Justnes, Calcareous smectite clay as a pozzolanic alternative to kaolin. European Journal of Environmental and Civil Engineering, 25(9) (2019) 1–18. DOI: 10.1080/19648189.2019.1590741
/Dan20/	T. Danner, G. Norden, H. Justnes, The effect of calcite in the raw clay on the pozzolanic activity of calcined illite and smectite. Calcined clays for sustainable concrete, RILEM Bookseries 25 (2020) 131-138 DOI: 10.1007/978-981-15-2806-4_15
/Fri08/	M. Frías, O. Rodríguez, I. Vegas, R. Vigil, Properties of calcined clay waste and its influence on blended cement behavior. Journal of the American Ceramic Society 91(4) (2008) 1226-1230. DOI: 10.1111/j.1551-2916.2008.02289.x
/Fri10/	M. Frías, O. Rodríguez, M.I. Sánchez de Rojas, S. Ferreiro, B. Nebreda, J. Olmeda, New construction materials: calcined paper sludges as active additions. Materials Science Forum 636 (2010) 1222-1227. DOI: 10.4028/www.scientific.net/MSF.636-637.1222
/Gon09/	J.P. Gonçalves, L.M. Tavares, R.D.T. Filho, E.M.R. Fairbairn, Performance Evaluation of Cement Mortars Modified with Metakaolin or Ground Brick, Construction and Building Materials 23(5) (2009) 1971-1979. DOI: 10.1016/j.conbuildmat.2008.08.027
/Gut08/	R.M. De Gutiérrez, J. Torres, C. Vizcayno, R. Castelló, Influence of the calcination temperature of kaolin on the mechanical properties of mortars and concretes containing metakaolin, Clay Minerals 43(2) (2008) 177-183. DOI: 10.1180/claymin.2008.043.2.02
/He94/	C. He, E. Makovicky, B. Øsback, Thermal stability and pozzolanic activity of calcined kaolin, Applied Clay Science 9(3) (1994) 165–187. DOI: 10.1016/0169-1317(94)90018-3
/He95/	C. He, E. Makovicky, B. Øsbæck, Thermal stability and pozzolanic activity of calcined illite, Applied Clay Science 9(5) (1995) 337–354. DOI:10.1016/0169-1317(94)00033-M
/He96/	C. He, E. Makovicky, B. Øsback, Thermal treatment and pozzolanic activity of Na-and Ca-montmorillonite, Applied Clay Science 10(5) (1996) 351-368. DOI: 10.1016/0169-1317(95)00037-2
/Hue18/	K.J. Huenger, R. Gerasch, I. Sander, M. Brigzinsky, On the reactivity of calcined clays from lower Lusatia for the production of durable concrete structures, Calcined Clays for Sustainable Concrete, RILEM Bookseries 16 (2018) 205-211. DOI: 10.1007/978-94-024-1207-9_33
/ibac/	unpublished data of the Institute for Building Materials Research (ibac), RWTH Aachen University
/Ira19a/	E.F. Irassar, V.L. Bonavetti, C.C. Castellano, M.A. Trezza, V.F. Rahhal, G. Cordoba, R. Lemma, Calcined illite-chlorite shale as supplementary cementing material: Thermal treatment, grinding, color and pozzolanic activity, Applied Clay Science 179 (2019) 105143. DOI: 10.1016/j.clay.2019.105143
/Ira19b/	E.F. Irassar, A. Tironi, V.L. Bonavetti, M.A. Trezza, C.C. Castellano, V.F. Rahhal, H.A. Donza, A.N. Scian, Thermal Treatment and Pozzolanic Activity of Calcined Clay and Shale, ACI Materials Journal 116(4) (2019) 133-143. DOI: 10.14359/51716717
/Jaf20/	K. Jafari, F. Rajabipour, Performance of Impure Calcined Clay as a Pozzolan in Concrete. Transportation Research Record: Journal of the Transportation Research Board 2675(2) (2020) 98–107. DOI:10.1177/0361198120953140
/Lem18/	R. Lemma, C.C. Castellano, V.L. Bonavetti, M.A. Trezza, V.F. Rahhal, E.F. Irassar, Thermal transformation of illitic-chlorite clay and its pozzolanic activity, Calcined Clays for Sustainable Concrete, RILEM Bookseries 16 (2018) 266-272. DOI: 10.1007/978-94-024-1207-9_43
/Lon22/	D. Londono-Zuluaga, A. Gholizadeh-Vayghan, F. Winnefeld, F. Avet, M. Ben Haha, S.A. Bernal, Ö. Cizer, M. Cyr, S. Dolenec, P. Durdzinski, L. Hanzic, J. Haufe, D. Hooton, S. Kamali-Bernard, X. Li, A.T.M. Marsh, M. Marroccoli, M. Mrak, Y. Muy, C. Patapy, M. Pedersen, S. Sabio, S. Schulze, R. Snellings, A. Telesca, A. Vollpracht, G. Ye, S. Zhang, K.L. Scrivener, Report of RILEM TC 267-TRM phase 3: Va…
/Mai20/	M. Maier, N. Beuntner, K.C. Thienel, An approach for the evaluation of local raw material potential for calcined clay as SCM, based on geological and mineralogical data: Examples from German clay deposits, Calcined Clays for Sustainable Concrete, RILEM Bookseries 16 (2020) 37-47. DOI: 10.1007/978-981-15-2806-4_5
/Mai21/	M. Maier, N. Beuntner, K.C. Thienel, Mineralogical characterization and reactivity test of common clays suitable as supplementary cementitious material, Applied Clay Science 202 (2021) 105990. DOI: 10.1016/j.clay.2021.105990
/Mer20/	G. Marchetti, V. Rahhal, Z. Pavlík, M. Pavlíková, E.F. Irassar, Assessment of packing, flowability, hydration kinetics, and strength of blended cements with illitic calcined shale, Construction and Building Materials 254 (2020) 119042. DOI: 10.1016/j.conbuildmat.2020.119042
/Moh16/	S. Mohammed, G. Elhem, B. Mekki, Valorization of pozzolanicity of Algerian clay: optimization of the heat treatment and mechanical characteristics of the involved cement mortars, Applied Clay Science, 132 (2016) 711-721. DOI: 10.1016/j.clay.2016.08.027
/Mou01/	E. Moulin, P. Blanc, Properties of Artificial Pozzolan Blended Cements as a Function of Clay Precursor Mineralogy and Cement Chemical Parameters, Special Publication 199 (2001) 361-378.
/Msi20/	N. S. Msinjili, P. Sturm, H.C. Kühne, G.J. Gluth, Comparison of brick clays and a kaolinitic clay regarding calcination and performance in blended cement mortars. Calcined Clays for Sustainable Concrete, RILEM Bookseries 25 (2020) 85-93. DOI: 10.1007/978-981-15-2806-4_10
/O'Fa06/	M. O'Farrell, B.B. Sabir, S. Wild, Strength and chemical resistance of mortars containing brick manufacturing clays subjected to different treatments, Cement Concrete Composition 28 (2006) 790-799. DOI: 10.1016/j.cemconcomp.2006.05.014
/Tay15/	S.C. Taylor-Lange, E.L. Lamon, K.A. Riding, K. A., M.C. Juenger, (2015), Calcined kaolinite–bentonite clay blends as supplementary cementitious materials, Applied Clay Science, 108 (2015) 84-93. DOI: 10.1016/j.clay.2015.01.025
/Tir14/	A. Tironi, M.A. Trezza, A.N. Scian, E.F. Irassar, Potential use of Argentine kaolinitic clays as pozzolanic material, Applied Clay Science 101 (2014) 468-476. DOI: 10.1016/j.clay.2014.09.009
/Tol07/	R. D. Toledo Filho, J. P. Gonçalves, B. B. Americano, & E. M. R. Fairbairn . Potential for use of crushed waste calcined-clay brick as a supplementary cementitious material in Brazil. Cement and Concrete Research, 37(9) (2007) 1357–1365. DOI:10.1016/j.cemconres.2007.06.005
/Tre18/	M.A. Trezza, A. Tironi, E.F. Irassar, Thermal activation of two complex clays (kaolinite-pyrophillite-illite) from tandilia system, Buenos Aires, Argentina, Calcined Clays for Sustainable Concrete, RILEM Bookseries 16 (2018) 469-474. DOI: 10.1007/978-94-024-1207-9_75
/Trü19/	A.Trümer, Calcinierte Tone als Puzzolane der Zukunft – Von den Rohstoffen bis zur Wirkung im Beton, dissertation, Weimar, 2019.
